# Supplementary material for: Brønsted acid and Pd–PHOX dual-catalysed enantioselective addition of activated C-pronucleophiles to internal dienes
Source: PubMed Central journal article supplement (PMC6524568; doi:10.1039/c9sc00633h), 2019-04-17

## Supporting Information

# Brønsted Acid and PHOX–Pd Dual-Catalyzed Enantioselective Addition of Activated C-Pronucleophiles to Internal Dienes

Sangjune Park and Steven J. Malcolmson\*

*Department of Chemistry, Duke University  
Durham, North Carolina 27708 USA*

*E-mail: steven.malcolmson@duke.edu*

### Table of Contents

|                                                                                |            |
|--------------------------------------------------------------------------------|------------|
| <b>I. General Information .....</b>                                            | <b>S2</b>  |
| <b>II. Preparation of Preparation of Catalyst, Ligands and Substrates.....</b> | <b>S4</b>  |
| <b>III. Supplemental Screening Data.....</b>                                   | <b>S6</b>  |
| <b>IV. Substrate Scope.....</b>                                                | <b>S9</b>  |
| <b>V. Additional Experiments .....</b>                                         | <b>S29</b> |
| <b>VI. Product Derivatizations.....</b>                                        | <b>S30</b> |
| <b>VII. Reaction Outcome Dependence on Diene Stereochemistry .....</b>         | <b>S32</b> |
| <b>VIII. Deuterium Labelling Studies.....</b>                                  | <b>S33</b> |
| <b>IX. References .....</b>                                                    | <b>S34</b> |
| <b>X. NMR Spectra.....</b>                                                     | <b>S35</b> |

## I. General Information

**General Procedures.** All reactions were carried out in oven- (120 °C) or flame-dried glassware under an inert atmosphere of dry N<sub>2</sub> unless otherwise noted. Oven-dried (60 °C or 120 °C) stainless steel cannulas and/or glass syringes (or N<sub>2</sub>-flushed plastic syringes) were used for reagent transfer. Organic solutions were concentrated under reduced pressure using a rotary evaporator (Büchi). Flash column chromatography was performed using SiliCycle SiliaFlash<sup>®</sup> P60 Silica Gel.

### Reagents.

*trans*-1-Bromo-1-propene (Sigma-Aldrich),  $\beta$ -bromostyrene (Sigma-Aldrich), 1,3-bis(trifluoromethyl)-5-bromobenzene (Chem-Impex), *n*-BuLi in cyclohexane 2.0 M (Sigma-Aldrich), (*n*-butyl)triphenylphosphonium bromide (Acros), carbon tetrabromide (TCI), catecholborane (Sigma-Aldrich), chlorobis[3,5-bis(trifluoromethyl)phenyl]phosphine (Alfa Aesar), chlorobis[4-(trifluoromethyl)phenyl]phosphine (Alfa Aesar), cesium carbonate (Sigma-Aldrich), 4-chlorocinnamaldehyde (Sigma-Aldrich), 4-chlorocinnamic acid (Matrix), *trans*-cinnamaldehyde (Alfa Aesar), diisobutylaluminum hydride (Sigma-Aldrich), ethylenediamine (Sigma-Aldrich), ethyltriphenylphosphonium bromide (Acros), lithium carbonate (Sigma-Aldrich), magnesium monoperoxyphthalate (Sigma-Aldrich), 4-methylcinnamic acid (Sigma-Aldrich), *trans-p*-methoxycinnamaldehyde (Acros), potassium tert-butoxide (Strem), potassium phthalimide (Sigma-Aldrich), 1-propynyl magnesium bromide in THF 0.5 M (Sigma-Aldrich), potassium carbonate (Alfa Aesar), sodium borohydride (VWR), *o*-tolualdehyde (TCI) and triphenylphosphine (Sigma-Aldrich) were used as received. Sodium tetrakis[3,5-bis(trifluoromethyl)phenyl]borate (NaBAR<sup>F</sup><sub>4</sub>) was prepared according to a reported procedure.<sup>1</sup>

**Solvents.** Solvents were sparged with dry N<sub>2</sub> and purified under a positive pressure of dry N<sub>2</sub> by an Innovative Technologies PureSolve solvent purification system: tetrahydrofuran (Sigma-Aldrich), dichloromethane (Sigma-Aldrich) and diethyl ether (Sigma-Aldrich), and toluene (Sigma-Aldrich) were passed through two consecutive alumina columns. Acetonitrile (Fisher) and ethanol (200 proof, Koptec) used for reactions were distilled over CaH<sub>2</sub> prior to use. Benzene (*anhyd.*, EMD Millipore), methanol (Sigma-Aldrich), DMF (*anhyd.*, Alfa Aesar), and *tert*-butanol were used as received. Hexanes (Fisher) and ethyl acetate (Fisher) were used for flash column chromatography and used as

received. HPLC-grade hexanes (Sigma-Aldrich), methanol (Sigma-Aldrich), acetonitrile (Sigma-Aldrich) and isopropanol (Sigma-Aldrich) were used as received.

**Instrumentation.**  $^1\text{H}$  NMR spectra were recorded on a Varian INOVA (400 MHz) and Bruker Advance Neo (500 MHz) spectrometer. Chemical shifts are reported in ppm from tetramethylsilane with the solvent resonance resulting from incomplete deuteration as the internal reference ( $\text{CDCl}_3$ :  $\delta$  7.24). Data are reported as follows: chemical shift, integration, multiplicity (s = singlet, d = doublet, t = triplet, q = quartet, br = broad, m = multiplet, app. = apparent), coupling constant(s) (Hz).  $^{13}\text{C}$  NMR spectra were recorded on a Varian/Agilent VNMRS (500 MHz) or Bruker Advance Neo (500 MHz) spectrometer with complete proton decoupling. Chemical shifts are reported in ppm from tetramethylsilane with the signal from chloroform as the internal reference ( $\text{CDCl}_3$ :  $\delta$  77.08).  $^{19}\text{F}$  NMR spectra were recorded on a Varian INOVA (400 MHz) or Bruker Advance Neo (500 MHz) spectrometer. Enantiomer ratios (er) were determined by HPLC (Phenomenex<sup>TM</sup> Lux<sup>®</sup> Cellulose I, III or Phenomenex<sup>TM</sup> Lux<sup>®</sup> Amylose I, II) in comparison with authentic racemic materials on a Shimadzu Prominence Modular HPLC. High-resolution mass spectrometry was performed on an Agilent (1200 Series) LCMS-TOF-DART at the Duke University Mass Spectrometry Facility. MALDI-MS data were recorded on a Bruker Autoflex Speed LRF MALDI-TOF. Specific rotation values were recorded on a Rudolph Autopol IV Polarimeter. Infrared (IR) spectra were collected on a Nicolet 6700 FT-IR spectrometer,  $\nu_{\text{max}}$  in  $\text{cm}^{-1}$ . Bands are characterized as broad (br), strong (s), medium (m), or weak (w). Melting points were measured on an Electrothermal MelTemp<sup>®</sup> capillary melting point apparatus and are uncorrected.

HRMS data are an average of 3–4 runs. Polarimetry data are an average of 5–6 trials. Melting point data are an average of 3 runs.

## II. Preparation of Catalyst, Ligands and Substrates

**1. Preparation of Catalyst and Ligands:** Pd-1 complex and ligands (**L2** and **L3**) were prepared as previously described.<sup>2,3</sup>

### 2. Preparation of Internal Diene Substrates

The following internal diene substrates were prepared as previously described:<sup>2</sup> ((*E*)-Penta-1,3-dien-1-yl)benzene (**1a**), 1-methoxy-4-((*E*,*E*)-penta-1,3-dien-1-yl)benzene (**1b**), 1-methyl-4-((*E*)-penta-1,3-dien-1-yl)benzene (**1c**), 1-chloro-4-((*E*)-penta-1,3-dien-1-yl)benzene (**1d**), 1-methyl-3-((*E*)-penta-1,3-dien-1-yl)benzene (**1e**), 1-methyl-2-((*E*)-penta-1,3-dien-1-yl)benzene (**1f**), ((*E*)-hepta-1,3-dien-1-yl)benzene (**1g**), ethyl (6*E*)-7-phenylhepta-4,6-dienoate (**1h**), ((*E*)-6-(benzyloxy)hexa-1,3-dien-1-yl)benzene (**1i**), *tert*-butyldimethyl(((6*E*)-7-phenylhepta-4,6-dien-1-yl)oxy)silane (**1j**), ((*E*)-penta-1,3-dien-1-yl)cyclohexane (**1l**) and (6*E*)-7-Phenylhepta-4,6-dien-1-ol (**A**).

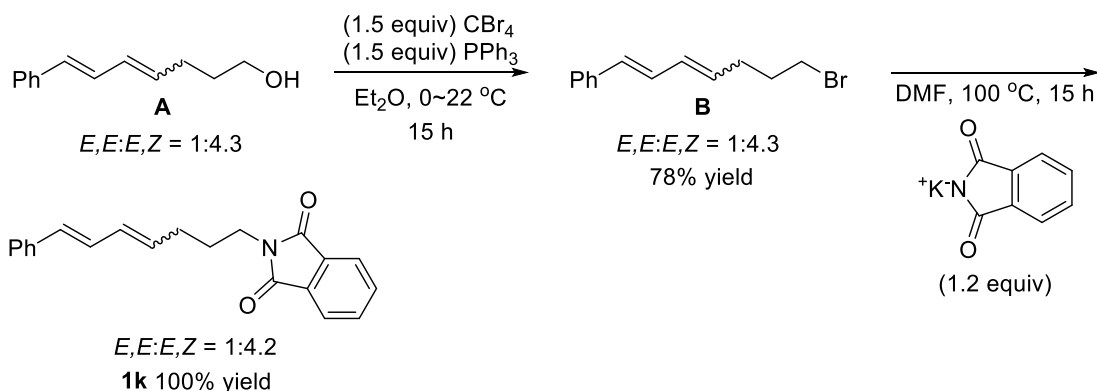

**((*E*)-7-Bromohepta-1,3-dien-1-yl)benzene (B):** To a dry 100-mL round-bottom flask equipped with a magnetic stirring rod was added carbon tetrabromide (4.97 g, 15.0 mmol, 1.50 equiv), triphenylphosphine (3.93 g, 15.0 mmol, 1.50 equiv) and Et<sub>2</sub>O (25 mL). The mixture was allowed to stir at 0 °C. After 15 min, **A** (1.88 g, 10.0 mmol, 1.00 equiv) was added and the reaction mixture was then allowed to stir and warm to ambient temperature. After 15 h, the mixture was poured into a separatory funnel filled with water (100 mL). The organics were extracted with EtOAc (3 X 50 mL). The combined organic fractions were dried over MgSO<sub>4</sub>, filtered, and concentrated. The residue was purified by silica gel column chromatography (100% hexanes to 90:10 hexanes:EtOAc) to give **B** (2.15 g, 8.56 mmol, 85.6% yield) as a colorless oil. *E,Z*-Major isomer: <sup>1</sup>H NMR (400 MHz, CDCl<sub>3</sub>) δ



7.41 (2H, d,  $J = 7.9$  Hz), 7.31 (2H, t,  $J = 7.5$  Hz), 7.21 (1H, t,  $J = 7.7$  Hz), 7.08 (1H, dd,  $J = 15.5, 11.2$  Hz), 6.54 (1H, d,  $J = 15.6$  Hz), 6.21 (1H, t,  $J = 10.8$  Hz), 5.50–5.41 (1H, m), 2.45 (2H, q,  $J = 7.4$  Hz), 2.02–1.94 (2H, m); ***E,E*-Minor isomer**:  $^1\text{H NMR}$  (400 MHz,  $\text{CDCl}_3$ )  $\delta$  7.36 (2H, d,  $J = 8.0$  Hz), 7.35–7.16 (1H, m), 6.73 (1H, dd,  $J = 15.7, 10.6$  Hz), 6.46 (1H, d,  $J = 15.6$  Hz), 6.28–6.19 (1H, m), 5.75 (1H, dt,  $J = 15.0, 7.3$  Hz), 3.46–3.40 (2H, m), 2.30 (2H, q,  $J = 7.2$  Hz), 2.02–1.94 (2H, m). Spectral data matched those previously reported.<sup>4</sup>

**2-((6*E*)-7-Phenylhepta-4,6-dien-1-yl)isoindoline-1,3-dione (1k)**: To a dry 100-mL round-bottom flask equipped with a magnetic stirring rod was added **B** (1.00 g, 3.98 mmol, 1.00 equiv), potassium phthalimide (885 mg, 4.78 mmol, 1.20 equiv) and DMF (60 mL). The mixture was allowed to stir and then heated to 100 °C for 15 h. The reaction mixture was then allowed to cool to ambient temperature and poured into a separatory funnel filled with water (100 mL). The organics were extracted with EtOAc (3 X 50 mL). The combined organic fractions were dried over  $\text{MgSO}_4$ , filtered, and concentrated. The residue was purified by silica gel column chromatography (100% hexanes to 80:20 hexanes:EtOAc) to give **1k** (1.27 g, 3.98 mmol, >98% yield) as a white solid. ***E,Z*-Major isomer**:  $^1\text{H NMR}$  (500 MHz,  $\text{CDCl}_3$ )  $\delta$  7.81 (2H, dd,  $J = 5.4, 3.0$  Hz), 7.67 (2H, dd,  $J = 5.5, 3.0$  Hz), 7.38 (2H, d,  $J = 7.3$  Hz), 7.35–7.14 (3H, m), 7.00 (1H, dd,  $J = 15.5, 11.2$  Hz), 6.49 (1H, d,  $J = 15.5$  Hz), 6.15 (1H, t,  $J = 11.0$  Hz), 5.50 (1H, dt,  $J = 10.5, 7.6$  Hz), 3.72 (2H, t,  $J = 7.2$  Hz), 2.35 (2H, q,  $J = 7.5$  Hz), 1.86–1.80 (2H, m);  $^{13}\text{C NMR}$  (125 MHz,  $\text{CDCl}_3$ )  $\delta$  168.4, 134.5, 133.9, 132.7, 132.2, 131.2, 130.0, 128.6, 127.5, 126.4, 124.1, 123.2, 37.7, 28.4, 25.4; ***E,E*-Minor isomer**:  $^1\text{H NMR}$  (500 MHz,  $\text{CDCl}_3$ )  $\delta$  7.82–7.79 (2H, m), 7.70–7.65 (2H, m), 7.35–7.14 (4H, m), 6.67 (1H, dd,  $J = 15.6, 10.4$  Hz), 6.40 (1H, d,  $J = 15.7$  Hz), 6.24–6.12 (1H, m), 5.78 (1H, dd,  $J = 14.7, 7.0$  Hz), 3.74–3.69 (2H, m), 2.20 (2H, q,  $J = 7.3$  Hz), 1.86–1.79 (2H, m);  $^{13}\text{C NMR}$  (125 MHz,  $\text{CDCl}_3$ )  $\delta$  168.5, 137.6, 133.8, 131.4, 130.6, 129.1, 128.6, 127.2, 126.2, 37.7, 30.2, 28.0; **IR** (neat,  $\text{cm}^{-1}$ ) 3028 (m), 2968 (m), 2931 (m), 1494 (m), 1450 (m), 1280 (m), 967 (s), 748 (s), 694 (s); **MP** 69–71 °C; **HRMS** (ESI<sup>+</sup>)  $[\text{M}+\text{H}]^+$  calc'd for  $\text{C}_{21}\text{H}_{20}\text{NO}_2$ : 318.1489, found: 318.1493.

### 3. Preparation of substituted malononitrile derivatives

2-methylmalononitrile (**4a**), 2-benzylmalononitrile (**4b**), and 2-cinnamylmalononitrile (**4c**) were prepared by the alkylation of malononitrile as previously described.<sup>5</sup>

### III. Supplemental Screening Data

**Table S1.** Other bases screened

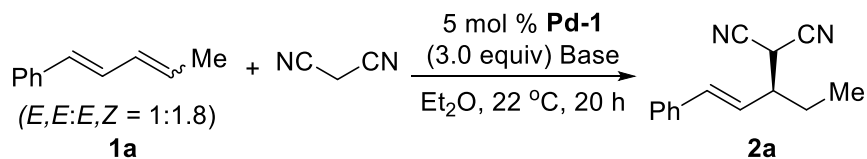

| entry | Base                             | yield (%) <sup>a</sup> | er <sup>b</sup> |
|-------|----------------------------------|------------------------|-----------------|
| 1     | Et <sub>3</sub> N                | 24                     | 99.5:0.5        |
| 2     | DBU                              | <5                     | -               |
| 3     | ( <i>i</i> -Pr) <sub>2</sub> NEt | <5                     | -               |
| 4     | pyridine                         | <5                     | -               |
| 5     | LiOt-Bu                          | 0                      | -               |
| 6     | K <sub>2</sub> CO <sub>3</sub>   | 0                      | -               |

Reaction conditions: **1a** (0.4 mmol), malononitrile (0.2 mmol), Et<sub>3</sub>N (0.6 mmol) and **Pd-1** were allowed to stir in solvent (0.2 mL, 1.0 M) at room temperature under N<sub>2</sub>.<sup>a</sup>Isolated yield. <sup>b</sup>Enantiomeric ratio determined by HPLC analysis of purified products in comparison with authentic racemic standards.

**Table S2.** Equivalents of **Pd-1** and Et<sub>3</sub>N·HBAr<sup>F</sup><sub>4</sub>

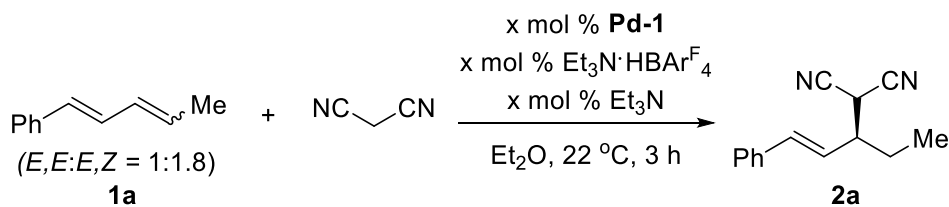

| entry | <b>Pd-1</b> (mol %) | Et <sub>3</sub> N (equiv) | Et <sub>3</sub> N·HBAr <sup>F</sup> <sub>4</sub> (mol %) | yield (%) <sup>a,b</sup> | er <sup>b</sup> |
|-------|---------------------|---------------------------|----------------------------------------------------------|--------------------------|-----------------|
| 1     | 5                   | 0                         | 0                                                        | <5                       | -               |
| 2     | 5                   | 1.0                       | 5                                                        | 39                       | 99.99:0.01      |
| 3     | 5                   | 3.0                       | 5                                                        | 67                       | 99.5:0.5        |
| 4     | 7                   | 3.0                       | 7                                                        | 93                       | 99.5:0.5        |
| 5     | 10                  | 3.0                       | 10                                                       | 93                       | 98.5:1.5        |

Reaction conditions: **1a** (0.4 mmol), malononitrile (0.2 mmol), Et<sub>3</sub>N (0.6 mmol) and **Pd-1** were allowed to stir in solvent (0.2 mL, 1.0 M) at room temperature under N<sub>2</sub>.<sup>a</sup>Isolated yield. <sup>b</sup>Enantiomeric ratio determined by HPLC analysis of purified products in comparison with authentic racemic standards.

**Table S3.** Further examination of equivalents of  $\text{Et}_3\text{N}\cdot\text{HBAr}^{\text{F}_4}$ 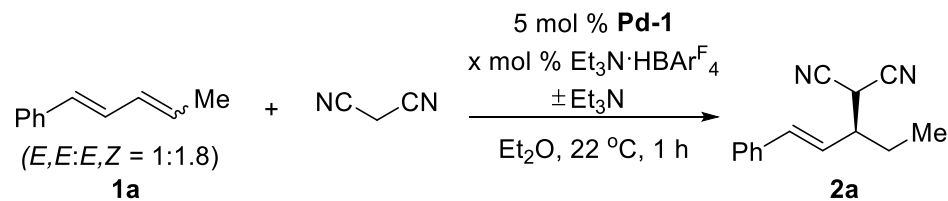

| entry | $\text{Et}_3\text{N}$ (equiv) | $\text{Et}_3\text{N}\cdot\text{HBAr}^{\text{F}_4}$ (mol %) | yield (%) <sup>a</sup> | er <sup>b</sup> |
|-------|-------------------------------|------------------------------------------------------------|------------------------|-----------------|
| 1     | 3.0                           | 5                                                          | 67                     | 99.5:0.5        |
| 2     | 3.0                           | 10                                                         | 67                     | 99:1            |
| 3     | 3.0                           | 20                                                         | 74                     | 99:1            |
| 4     | 3.0                           | 100                                                        | 91(9) <sup>c</sup>     | 99.5:0.5        |
| 5     | 0                             | 100                                                        | N.R.                   | -               |

Reaction conditions: **1a** (0.4 mmol), malononitrile (0.2 mmol),  $\text{Et}_3\text{N}$  (0.6 mmol) and **Pd-1** were allowed to stir in solvent (0.2 mL, 1.0 M) at room temperature under  $\text{N}_2$ . <sup>a</sup>Isolated yield. <sup>b</sup>Enantiomeric ratio determined by HPLC analysis of purified products in comparison with authentic racemic standard. <sup>c</sup>Yield of bis-alkylated product.

**Table S4.** Equivalents of  $\text{Et}_3\text{N}$ 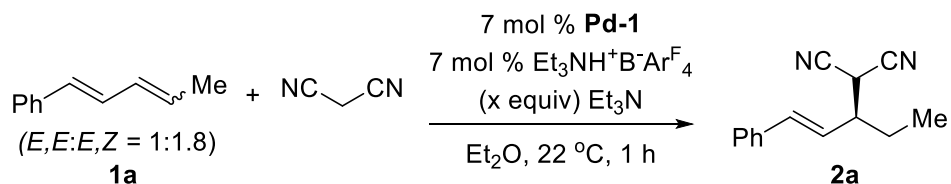

| entry | $\text{Et}_3\text{N}$ (equiv) | yield (%) <sup>a</sup> | er <sup>b</sup> |
|-------|-------------------------------|------------------------|-----------------|
| 1     | 0.07                          | 52(4) <sup>c</sup>     | 99.5:0.5        |
| 2     | 0.20                          | 71(11) <sup>c</sup>    | 99:1            |
| 3     | 0.50                          | 62(14) <sup>c</sup>    | 98.5:1.5        |
| 4     | 1.0                           | 62(17) <sup>c</sup>    | 98.5:1.5        |
| 5     | 2.0                           | 93(3) <sup>c</sup>     | 99.5:0.5        |
| 6     | 3.0                           | 93                     | 99.5:0.5        |

Reaction conditions: **1a** (0.4 mmol), malononitrile (0.2 mmol),  $\text{Et}_3\text{N}$  (0.6 mmol) and **Pd-1** were allowed to stir in solvent (0.2 mL, 1.0 M) at room temperature under  $\text{N}_2$ . <sup>a</sup>Isolated yield. <sup>b</sup>Enantiomeric ratio determined by HPLC analysis of purified products in comparison with authentic racemic standard. <sup>c</sup>Yield of bis-alkylated product.

An additional experiment was performed using 5.0 equiv of **1a** and 1.0 equiv of Et<sub>3</sub>N in an attempt to force conversion to the bis-alkylated product **3a**; however, the mono-alkylated product **2a** was still isolated as the major product.

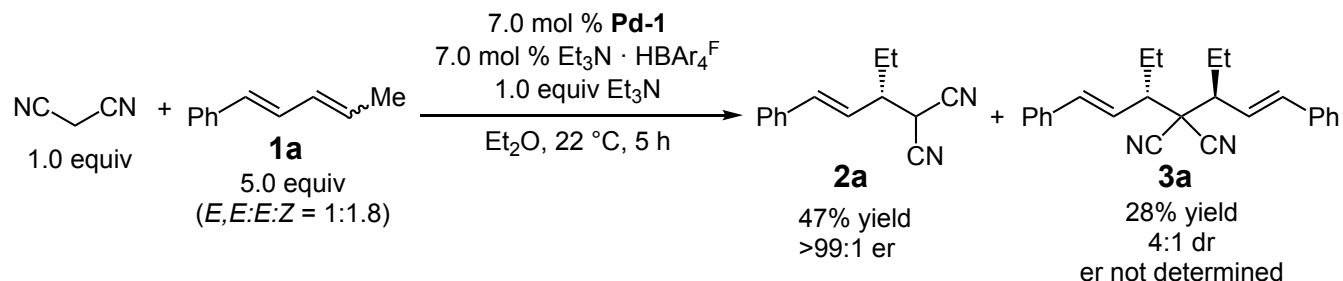

**Table S5.** Other PHOX ligands screened

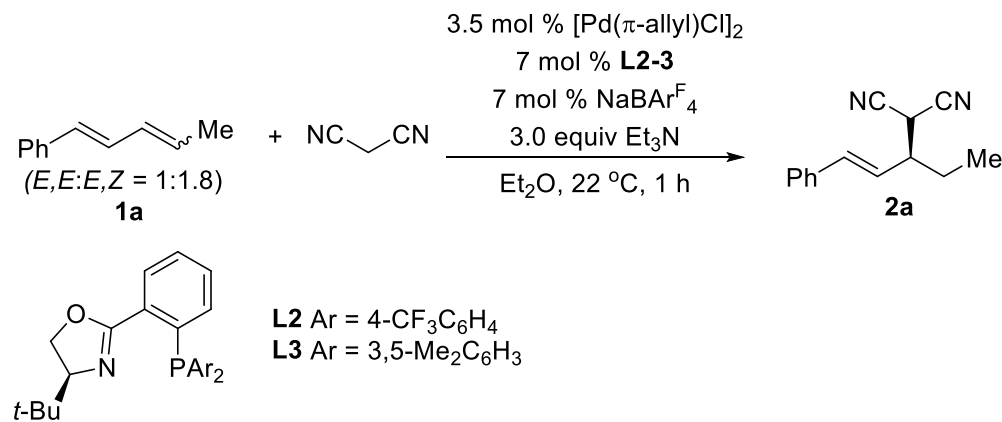

| entry | PHOX ligands | yield (%) <sup>a</sup> | er <sup>b</sup> |
|-------|--------------|------------------------|-----------------|
| 1     | <b>L2</b>    | 62(30) <sup>c</sup>    | 93:7            |
| 2     | <b>L3</b>    | 12                     | 85.5:14.5       |

Reaction conditions: **1a** (0.4 mmol), malononitrile (0.2 mmol) and Et<sub>3</sub>N (0.6 mmol) in the presence of [Pd( $\pi$ -allyl)Cl]<sub>2</sub> (3.5 mol %), PHOX ligands (7 mol %) and NaBAR<sub>4</sub>F (7 mol %) were allowed to stir in Et<sub>2</sub>O (0.2 mL) under N<sub>2</sub>. <sup>a</sup>Isolated yield. <sup>b</sup>Enantiomeric ratio determined by HPLC analysis of purified products in comparison with authentic racemic standard. <sup>c</sup>Yield of bis-alkylated product.

## IV. Substrate Scope

### Hydroalkylation of Internal Dienes

General Method: Inside an N<sub>2</sub>-filled glovebox, to a microwave vial equipped with a magnetic stirring rod were added successively: **Pd-1** (0.014 mmol, 7.0 mol %), appropriate nucleophile (0.20 mmol, 1.0 equiv), Et<sub>2</sub>O (0.2 mL), appropriate diene (0.40 mmol, 2.0 equiv), and lastly Et<sub>3</sub>N (84 μL, 0.60 mmol, 3.0 equiv). Reactions were allowed to stir at room temperature for the specified amount of time. The solution was then concentrated in vacuo and the unpurified material was analyzed by <sup>1</sup>H NMR to determine the regiomer ratio and diastereomer ratio when appropriate. The material was purified by flash silica gel chromatography.

The results for the substrate scope in the manuscript are an average of two runs, but for clarity, the results shown below are one of the two runs.

Products **2** and **5** contain <5% of the allylated starting material pronucleophile that is generated upon precatalyst activation and could not be separated from the desired product.<sup>6</sup>

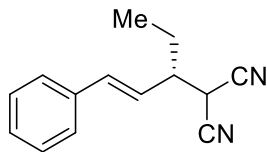**2a**

**(*S,E*)-2-(1-phenylpent-1-en-3-yl)malononitrile (2a):** Prepared by the General Method using **Pd-1** at 22 °C for 1 h. The material was purified by flash silica gel chromatography (100% hexanes to 80:20 hexanes:EtOAc) to yield **2a** as a colorless oil (39.2 mg, 0.186 mmol, 93.0% yield).  $^1\text{H NMR}$  (400 MHz,  $\text{CDCl}_3$ )  $\delta$  7.40 (2H, d,  $J = 8.0$  Hz), 7.37–7.25 (3H, m), 6.67 (1H, d,  $J = 15.7$  Hz), 5.99 (1H, dd,  $J = 15.7, 9.3$  Hz), 3.78 (1H, d,  $J = 5.3$  Hz), 2.76–2.69 (1H, m), 1.90–1.80 (1H, m), 1.77–1.65 (1H, m), 1.01 (3H, t,  $J = 7.3$  Hz);  $^{13}\text{C NMR}$  (125 MHz,  $\text{CDCl}_3$ )  $\delta$  136.4, 135.6, 128.8, 128.5, 126.7, 124.6, 111.9, 111.7, 46.4, 28.8, 25.5, 11.5; **IR** (neat,  $\text{cm}^{-1}$ ) 3028 (m), 2968 (m), 2931 (m), 1494 (m), 1450 (m), 1280 (m), 967 (s), 748 (s), 694 (s); **HRMS** ( $\text{ESI}^+$ )  $[\text{M}+\text{H}]^+$  calc'd for  $\text{C}_{14}\text{H}_{15}\text{N}_2$ : 211.1230, found: 211.1231.  $[\alpha]_{\text{D}}^{27} = -15.0$  ( $c = 1.0$ ,  $\text{CHCl}_3$ ) for a sample of 99.5:0.5 er.

**HPLC:** Column: Lux Amylose-2 (3  $\mu\text{m}$ , 4.60 mm X 250 mm). Mobile phase: 10:90 *i*-PrOH:Hexanes, 1.0 mL/min. Detection wavelength: 254 nm. Er = 99.5:0.5.

<Chromatogram>  
mV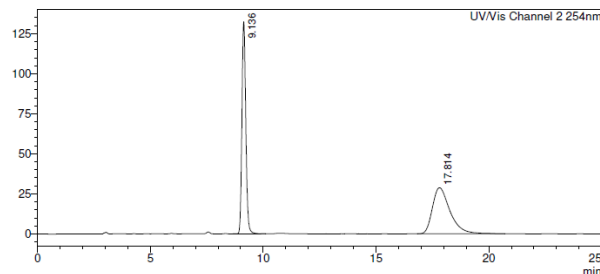

&lt;Peak Table&gt;

| UV/Vis Channel 2 254nm |           |         |         |
|------------------------|-----------|---------|---------|
| Peak#                  | Ret. Time | Area    | Area%   |
| 1                      | 9.136     | 1585693 | 50.407  |
| 2                      | 17.814    | 1560103 | 49.593  |
| Total                  |           | 3145796 | 100.000 |

<Chromatogram>  
mV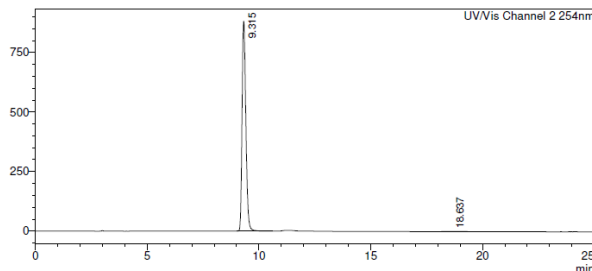

&lt;Peak Table&gt;

| UV/Vis Channel 2 254nm |           |          |         |
|------------------------|-----------|----------|---------|
| Peak#                  | Ret. Time | Area     | Area%   |
| 1                      | 9.315     | 10414359 | 99.403  |
| 2                      | 18.637    | 62537    | 0.597   |
| Total                  |           | 10476897 | 100.000 |

**Bis-alkylated side product:**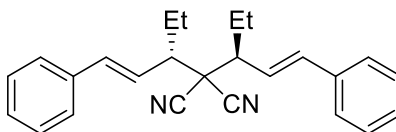**3a**

**2,2-Bis((*S,E*)-1-phenylpent-1-en-3-yl)malononitrile (3a):** The material was purified by flash silica gel chromatography (100% hexanes to 80:20 hexanes:EtOAc) to yield **3a** as a colorless oil. **<sup>1</sup>H NMR** (500 MHz, CDCl<sub>3</sub>)  $\delta$  7.41–7.30 (10H, m), 6.45 (2H, d,  $J$  = 15.8 Hz), 5.89 (2H, dd,  $J$  = 15.7, 9.9 Hz), 2.60–2.54 (2H, m), 2.09–2.04 (2H, m), 1.77–1.67 (2H, m), 0.92 (6H, t,  $J$  = 7.3 Hz); **<sup>13</sup>C NMR** (125 MHz, CDCl<sub>3</sub>)  $\delta$  137.1, 135.8, 129.0, 128.6, 126.6, 123.3, 114.7, 50.3, 47.0, 25.1, 11.7; **IR** (neat, cm<sup>-1</sup>) 3026 (w), 2965 (m), 2930 (m), 2875 (m), 1492 (m), 1451 (s), 967 (s), 751 (s), 691 (s); **HRMS** (ESI<sup>+</sup>) [M+H]<sup>+</sup> calc'd for C<sub>25</sub>H<sub>27</sub>N<sub>2</sub>: 355.2169, found: 355.2172.

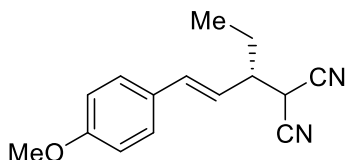**2b**

**(*S,E*)-2-(1-(4-methoxyphenyl)pent-1-en-3-yl)malononitrile (2b):** Prepared by The General Method using **Pd-1** at 22 °C for 1 h. The material was purified by flash silica gel chromatography (100% hexanes to 90:10 hexanes:EtOAc) to yield **2b** as a colorless oil (32.0 mg, 0.133 mmol, 66.6 yield). **<sup>1</sup>H NMR** (400 MHz, CDCl<sub>3</sub>) δ 7.33 (2H, d, *J* = 8.7 Hz), 6.86 (2H, d, *J* = 8.7 Hz), 6.60 (1H, d, *J* = 15.7 Hz), 5.83 (1H, dd, *J* = 15.7, 9.3 Hz), 3.80 (3H, s), 3.76 (1H, d, *J* = 5.3 Hz), 2.75–2.62 (1H, m), 1.91–1.77 (1H, m), 1.76–1.60 (1H, m), 0.99 (3H, t, *J* = 7.4 Hz); **<sup>13</sup>C NMR** (125 MHz, CDCl<sub>3</sub>) δ 159.9, 135.7, 128.4, 128.0, 122.3, 114.1, 112.0, 111.8, 55.4, 46.4, 28.9, 25.5, 11.5; **IR** (neat, cm<sup>-1</sup>) 2966 (m), 2933 (m), 2838 (w), 1577 (s), 1606 (w), 1511 (s), 1462 (m), 1248 (s), 1175 (s), 1030 (s), 968 (s), 819 (s); **HRMS** (ESI<sup>+</sup>) [M+H]<sup>+</sup> calc'd for C<sub>15</sub>H<sub>17</sub>N<sub>2</sub>O: 241.1337, found: 241.1337. [α]<sub>D</sub><sup>27</sup> = -15.1 (*c* = 1.0, CHCl<sub>3</sub>) for a sample of 99:1 er.

**HPLC:** Column: Lux Amylose-2 (3 μm, 4.60 mm X 250 mm). Mobile phase: 10:90 *i*-PrOH:Hexanes, 0.3 mL/min. Detection wavelength: 254 nm. Er = 99:1.

<Chromatogram>  
mV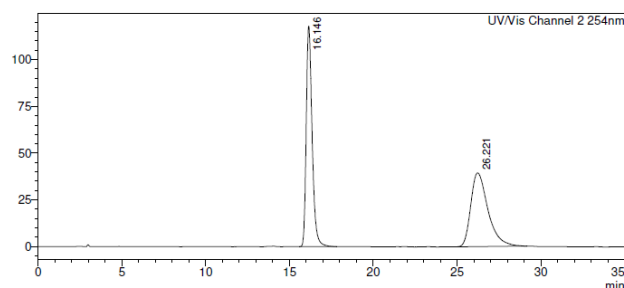

&lt;Peak Table&gt;

| UV/Vis Channel 2 254nm |           |         |         |
|------------------------|-----------|---------|---------|
| Peak#                  | Ret. Time | Area    | Area%   |
| 1                      | 16.146    | 2875505 | 50.489  |
| 2                      | 26.221    | 2819776 | 49.511  |
| Total                  |           | 5695281 | 100.000 |

<Chromatogram>  
mV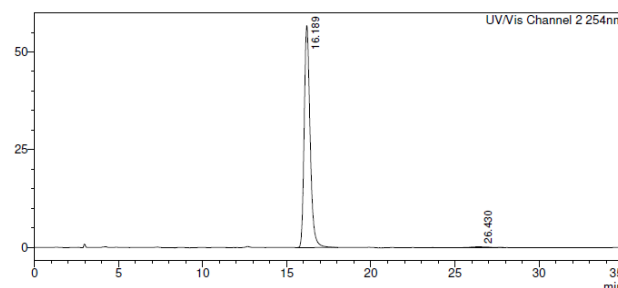

&lt;Peak Table&gt;

| UV/Vis Channel 2 254nm |           |         |         |
|------------------------|-----------|---------|---------|
| Peak#                  | Ret. Time | Area    | Area%   |
| 1                      | 16.189    | 1386012 | 98.797  |
| 2                      | 26.430    | 16880   | 1.203   |
| Total                  |           | 1402892 | 100.000 |



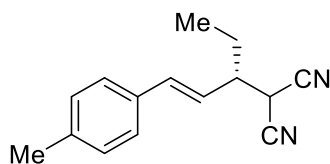**2c**

**(*S,E*)-2-(1-(*p*-tolyl)pent-1-en-3-yl)malononitrile (2c):** Prepared by The General Method using **Pd-1** at 22 °C for 1 h. The material was purified by flash silica gel chromatography (100% hexanes to 80:20 hexanes:EtOAc) to yield **2c** as a colorless oil (24.0 mg, 0.107 mmol, 54.0% yield). <sup>1</sup>H NMR (400 MHz, CDCl<sub>3</sub>) δ 7.29 (2H, d, *J* = 8.1 Hz), 7.14 (2H, d, *J* = 7.9 Hz), 6.63 (1H, d, *J* = 15.7 Hz), 5.93 (1H, dd, *J* = 15.7, 9.3 Hz), 3.76 (1H, d, *J* = 5.3 Hz), 2.74–2.67 (1H, m), 2.34 (3H, s), 1.94–1.84 (1H, m), 1.80–1.69 (1H, m), 1.00 (3H, t, *J* = 7.4 Hz); <sup>13</sup>C NMR (125 MHz, CDCl<sub>3</sub>) δ 138.5, 136.2, 132.9, 129.4, 126.7, 123.6, 111.9, 111.8, 46.4, 28.9, 25.5, 21.3, 11.5; **IR** (neat, cm<sup>-1</sup>) 2967 (m), 2923 (m), 1513 (s), 1455 (m), 1114 (w), 968 (s), 804 (s); **HRMS** (ESI<sup>+</sup>) [M+H]<sup>+</sup> calc'd for C<sub>15</sub>H<sub>17</sub>N<sub>2</sub>: 225.1386, found: 225.1385.

[α]<sub>D</sub><sup>27</sup> = -15.1 (*c* = 1.0, CHCl<sub>3</sub>) for a sample of 98:2 er.

**HPLC:** Column: Lux Amylose-2 (3 μm, 4.60 mm X 250 mm). Mobile phase: 10:90 *i*-PrOH:Hexanes, 1.0 mL/min. Detection wavelength: 254 nm. Er = 98:2.

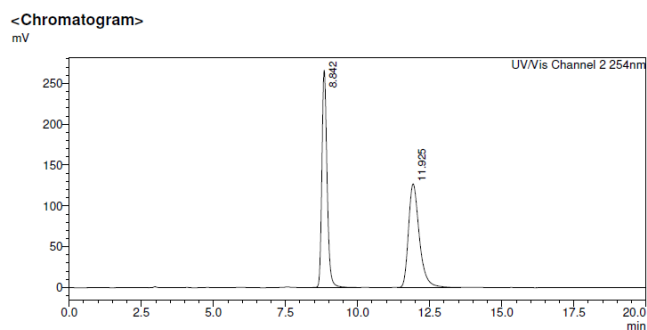

<Peak Table>  
UV/Vis Channel 2 254nm

| Peak# | Ret. Time | Area    | Area%   |
|-------|-----------|---------|---------|
| 1     | 8.842     | 3353676 | 50.275  |
| 2     | 11.925    | 3316926 | 49.725  |
| Total |           | 6670602 | 100.000 |

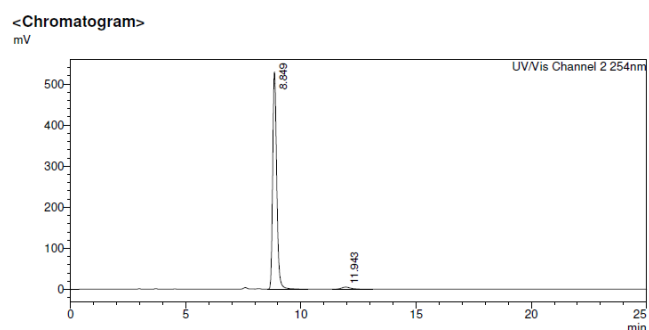

<Peak Table>  
UV/Vis Channel 2 254nm

| Peak# | Ret. Time | Area    | Area%   |
|-------|-----------|---------|---------|
| 1     | 8.849     | 6420840 | 97.938  |
| 2     | 11.943    | 135177  | 2.062   |
| Total |           | 6556016 | 100.000 |

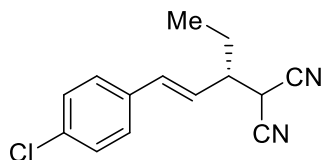**2d**

**(*S,E*)-2-(1-(4-chlorophenyl)pent-1-en-3-yl)malononitrile (2d):** Prepared by General Method using **Pd-1** at 22 °C for 1 h. The material was purified by flash silica gel chromatography (100% hexanes to 80:20 hexanes:EtOAc) to yield **2d** as a colorless oil (19.6 mg, 0.080 mmol, 40.0% yield). **<sup>1</sup>H NMR** (400 MHz, CDCl<sub>3</sub>) δ 7.38–7.27 (4H, m), 6.62 (1H, d, *J* = 15.7 Hz), 5.96 (1H, dd, *J* = 15.8, 9.3 Hz), 3.78 (1H, d, *J* = 5.3 Hz), 2.76–2.68 (1H, m), 1.91–1.79 (1H, m), 1.78–1.65 (1H, m), 1.00 (3H, t, *J* = 7.4 Hz); **<sup>13</sup>C NMR** (125 MHz, CDCl<sub>3</sub>) δ 135.2, 134.3, 134.1, 129.0, 128.0, 125.3, 111.9, 111.6, 46.4, 28.7, 25.5, 11.5; **IR** (neat, cm<sup>-1</sup>) 2962 (m), 2930 (m), 2912 (w), 2873 (w), 1491 (s), 1357 (m), 1113 (s), 993 (s), 946 (m), 812 (s); **HRMS** (ESI<sup>+</sup>) [M+H]<sup>+</sup> calc'd for C<sub>14</sub>H<sub>13</sub>ClN<sub>2</sub>: 245.0840, found: 245.0836. **[α]<sub>D</sub><sup>27</sup>** = −15.1 (*c* = 1.0, CHCl<sub>3</sub>) for a sample of 96:4 er.

**HPLC:** Column: Lux Amylose-2 (3 μm, 4.60 mm X 250 mm). Mobile phase: 10:90 *i*-PrOH:Hexanes, 1.0 mL/min. Detection wavelength: 254 nm. Er = 96:4.

<Chromatogram>  
mV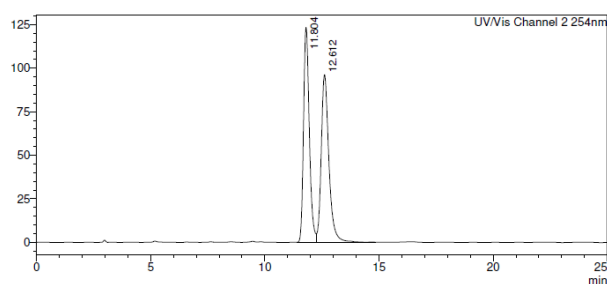

&lt;Peak Table&gt;

| UV/Vis Channel 2 254nm |           |         |         |
|------------------------|-----------|---------|---------|
| Peak#                  | Ret. Time | Area    | Area%   |
| 1                      | 11.804    | 2167621 | 49.183  |
| 2                      | 12.612    | 2239640 | 50.817  |
| Total                  |           | 4407261 | 100.000 |

<Chromatogram>  
mV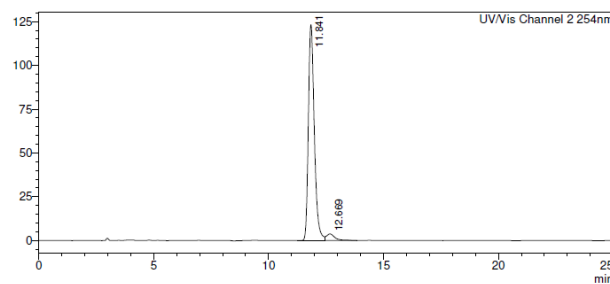

&lt;Peak Table&gt;

| UV/Vis Channel 2 254nm |           |         |         |
|------------------------|-----------|---------|---------|
| Peak#                  | Ret. Time | Area    | Area%   |
| 1                      | 11.841    | 2218480 | 95.710  |
| 2                      | 12.669    | 99446   | 4.290   |
| Total                  |           | 2317926 | 100.000 |

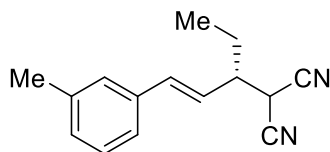**2e**

**(*S,E*)-2-(1-(*m*-Tolyl)pent-1-en-3-yl)malononitrile (**2e**):** Prepared by The General Method using **Pd-1** at 22 °C for 1 h. The material was purified by flash silica gel chromatography (100% hexanes to 90:10 hexanes:EtOAc) to yield **2e** as a colorless oil (40.0 mg, 0.178 mmol, 89.2% yield). **<sup>1</sup>H NMR** (400 MHz, CDCl<sub>3</sub>) δ 7.25–7.10 (3H, m), 7.11 (1H, d, *J* = 7.1 Hz), 6.64 (1H, d, *J* = 15.7 Hz), 5.97 (1H, dd, *J* = 15.7, 9.3 Hz), 3.77 (1H, d, *J* = 5.3 Hz), 2.74–2.67 (1H, m), 2.35 (3H, s), 1.90–1.79 (1H, m), 1.76–1.65 (1H, m), 1.00 (3H, t, *J* = 7.4 Hz); **<sup>13</sup>C NMR** (125 MHz, CDCl<sub>3</sub>) δ 138.4, 136.5, 135.6, 129.3, 128.7, 127.4, 124.4, 124.0, 111.9, 111.7, 46.4, 28.9, 25.5, 21.4, 11.5; **IR** (neat, cm<sup>-1</sup>) 2967 (m), 2924 (m), 1604 (m), 1460 (s), 1355 (w), 967 (s), 777 (s), 694 (s); **HRMS** (ESI<sup>+</sup>) [M+H]<sup>+</sup> calc'd for C<sub>15</sub>H<sub>16</sub>N<sub>2</sub>: 225.1386, found: 225.1381.

**[α]<sub>D</sub><sup>27</sup>** = −14.8 (*c* = 1.0, CHCl<sub>3</sub>) for a sample of 97.5:2.5 er.

**HPLC:** Column: Lux amylose-2 (3 μm, 4.60 mm X 250 mm). Mobile phase: 10:90 *i*-PrOH:Hexanes, 1.0 mL/min. Detection wavelength: 254 nm. Er = 97.5:2.5.

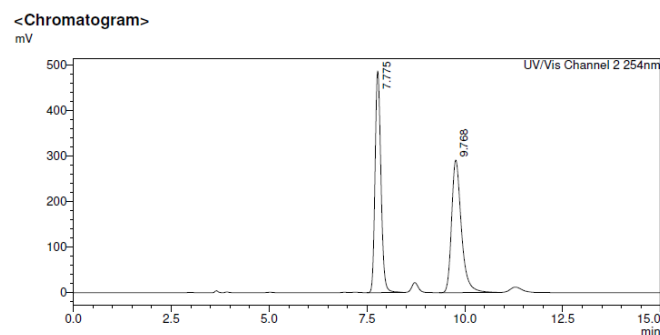

<Peak Table>  
UV/Vis Channel 2 254nm

| Peak# | Ret. Time | Area     | Area%   |
|-------|-----------|----------|---------|
| 1     | 7.775     | 5081417  | 50.026  |
| 2     | 9.768     | 5076036  | 49.974  |
| Total |           | 10157453 | 100.000 |

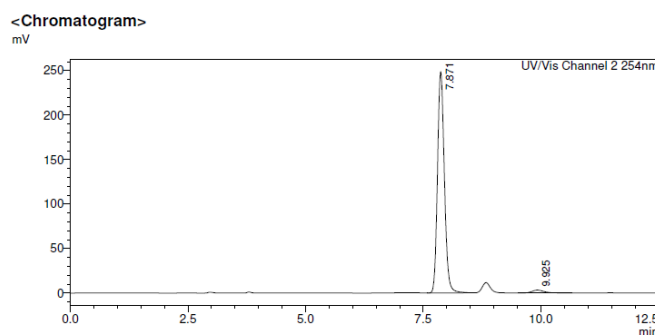

<Peak Table>  
UV/Vis Channel 2 254nm

| Peak# | Ret. Time | Area    | Area%   |
|-------|-----------|---------|---------|
| 1     | 7.871     | 2526611 | 97.712  |
| 2     | 9.925     | 59147   | 2.288   |
| Total |           | 2584758 | 100.000 |

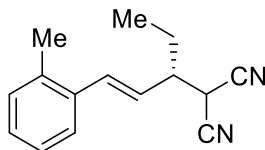**2f**

**(*S,E*)-2-(1-(*o*-Tolyl)pent-1-en-3-yl)malononitrile (2f):** Prepared by The General Method using **Pd-1** at 22 °C for 1 h. The material was purified by flash silica gel chromatography (100% hexanes to 90:10 hexanes:EtOAc) to yield **2f** as a colorless oil (39.0 mg, 0.174 mmol, 86.9 % yield). **<sup>1</sup>H NMR** (400 MHz, CDCl<sub>3</sub>)  $\delta$  7.46–7.40 (1H, m), 7.23–7.14 (3H, m), 6.90 (1H, d,  $J$  = 15.6 Hz), 5.85 (1H, dd,  $J$  = 15.6, 9.3 Hz), 3.78 (1H, d,  $J$  = 5.5 Hz, 1H), 2.83–2.76 (1H, m), 2.37 (3H, s), 1.96–1.86 (1H, m), 1.82–1.71 (1H, m), 1.03 (3H, t,  $J$  = 7.4 Hz); **<sup>13</sup>C NMR** (125 MHz, CDCl<sub>3</sub>)  $\delta$  135.7, 135.1, 134.6, 130.4, 128.4, 126.3, 126.1, 112.0, 111.7, 46.5, 28.9, 25.4, 19.8, 11.5; **IR** (neat, cm<sup>-1</sup>) 2967 (m), 2929 (m), 1484 (m), 1460 (s), 1356 (w), 968 (s), 750 (s); **HRMS** (ESI<sup>+</sup>) [M+H]<sup>+</sup> calc'd for C<sub>15</sub>H<sub>17</sub>N<sub>2</sub>: 225.1386, found: 225.1386.

$[\alpha]_D^{27} = -14.7$  ( $c = 1.0$ , CHCl<sub>3</sub>) for a sample of 96:4 er.

**HPLC:** Column: Lux amylose-2 (3  $\mu$ m, 4.60 mm X 250 mm). Mobile phase: 3:97 *i*-PrOH:Hexanes, 1.0 mL/min. Detection wavelength: 254 nm. Er = 96:4.

<Chromatogram>  
mV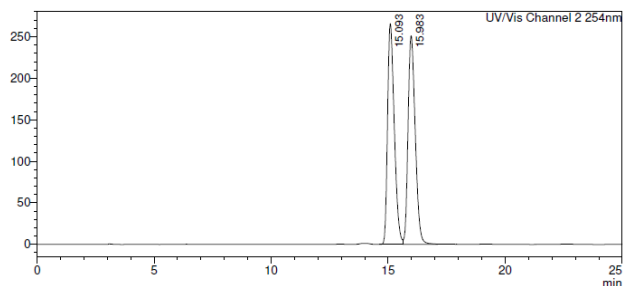

&lt;Peak Table&gt;

| UV/Vis Channel 2 254nm |           |          |         |
|------------------------|-----------|----------|---------|
| Peak#                  | Ret. Time | Area     | Area%   |
| 1                      | 15.093    | 5307988  | 49.652  |
| 2                      | 15.983    | 5382308  | 50.348  |
| Total                  |           | 10690295 | 100.000 |

<Chromatogram>  
mV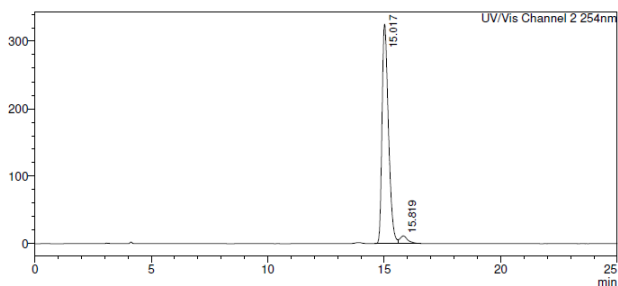

&lt;Peak Table&gt;

| UV/Vis Channel 2 254nm |           |         |         |
|------------------------|-----------|---------|---------|
| Peak#                  | Ret. Time | Area    | Area%   |
| 1                      | 15.017    | 6230733 | 95.886  |
| 2                      | 15.819    | 267344  | 4.114   |
| Total                  |           | 6498077 | 100.000 |

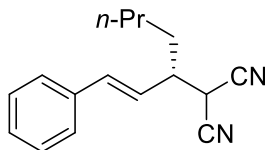**2g**

**(*S,E*)-2-(1-phenylhex-1-en-3-yl)malononitrile (2g):** Prepared by General Method using **Pd-1** at 22 °C for 1 h. The material was purified by flash silica gel chromatography (100% hexanes to 80:20 hexanes:EtOAc) to yield **2g** as a colorless oil (37.2 mg, 0.156 mmol, 78.0% yield). <sup>1</sup>H NMR (400 MHz, CDCl<sub>3</sub>) δ 7.40 (2H, d, *J* = 7.0 Hz), 7.34 (2H, dd, *J* = 7.3, 7.3 Hz), 7.31–7.26 (1H, m), 6.66 (1H, d, *J* = 15.7 Hz), 6.00 (1H, *J* = 15.7, 9.3 Hz), 3.77 (1H, d, *J* = 5.2 Hz), 2.80 (1H, tt, *J* = 9.7, 4.9 Hz), 1.83–1.64 (2H, m), 1.43–1.25 (4H, m), 0.91 (3H, t, *J* = 6.8 Hz); <sup>13</sup>C NMR (125 MHz, CDCl<sub>3</sub>) δ 136.1, 135.6, 128.8, 128.5, 126.8, 125.0, 111.9, 111.7, 44.8, 32.0, 29.1, 29.0, 22.3, 13.9; IR (neat, cm<sup>-1</sup>) 3028 (w), 2957 (m), 2930 (m), 2859 (m), 1495 (m), 1450 (m), 967 (s), 749 (s), 694 (s); HRMS (ESI<sup>+</sup>) [M+H]<sup>+</sup> calc'd for C<sub>16</sub>H<sub>19</sub>N<sub>2</sub>: 239.1543, found: 239.1541.

[α]<sub>D</sub><sup>27</sup> = −15.0 (*c* = 1.0, CHCl<sub>3</sub>) for a sample of 95.5:4.5 er.

**HPLC:** Column: Lux Amylose-2 (3 μm, 4.60 mm X 250 mm). Mobile phase: 10:90 *i*-PrOH:Hexanes, 1.0 mL/min. Detection wavelength: 254 nm. Er = 95.5:4.5.

<Chromatogram>  
mV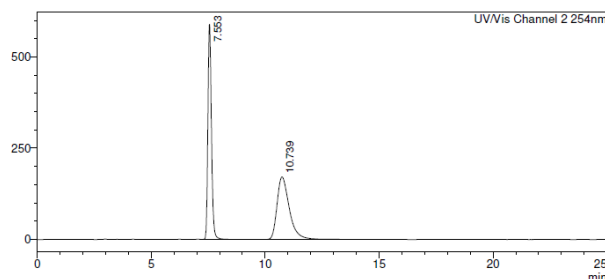

&lt;Peak Table&gt;

| UV/Vis Channel 2 254nm |           |          |         |
|------------------------|-----------|----------|---------|
| Peak#                  | Ret. Time | Area     | Area%   |
| 1                      | 7.553     | 6413052  | 49.993  |
| 2                      | 10.739    | 6414741  | 50.007  |
| Total                  |           | 12827794 | 100.000 |

<Chromatogram>  
mV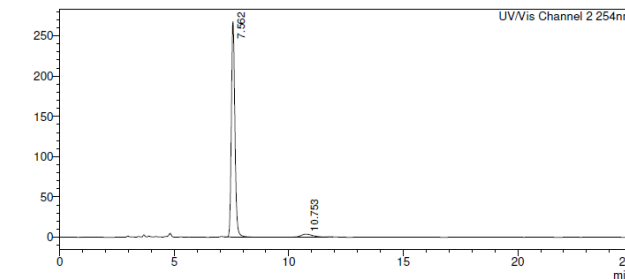

&lt;Peak Table&gt;

| UV/Vis Channel 2 254nm |           |         |         |
|------------------------|-----------|---------|---------|
| Peak#                  | Ret. Time | Area    | Area%   |
| 1                      | 7.562     | 2896427 | 95.628  |
| 2                      | 10.753    | 132406  | 4.372   |
| Total                  |           | 3028833 | 100.000 |

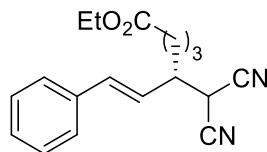**2h**

**Ethyl (*S,E*)-5-(dicyanomethyl)-7-phenylhept-6-enoate (**2h**):** Prepared by The General Method using **Pd-1** at 22 °C for 1 h. The material was purified by flash silica gel chromatography (100% hexanes to 80:20 hexanes:EtOAc) to yield **2h** as a colorless oil (37.0 mg, 0.125 mmol, 62.4% yield). <sup>1</sup>H NMR (500 MHz, CDCl<sub>3</sub>) δ 7.39 (2H, d, *J* = 7.2 Hz), 7.33 (2H, t, *J* = 7.3 Hz), 7.28 (1H, t, *J* = 7.2 Hz), 6.68 (1H, d, *J* = 15.7 Hz), 5.99 (1H, dd, *J* = 15.7, 9.3 Hz), 4.12 (2H, q, *J* = 7.1 Hz), 3.80 (1H, d, *J* = 5.2 Hz), 2.85–2.79 (1H, m), 2.34 (2H, td, *J* = 6.8, 2.9 Hz), 1.85–1.58 (4H, m), 1.24 (3H, t, *J* = 7.1 Hz); <sup>13</sup>C NMR (125 MHz, CDCl<sub>3</sub>) δ 172.8, 136.7, 135.5, 128.8, 128.7, 126.8, 124.3, 111.7, 60.7, 44.7, 33.6, 31.6, 29.1, 22.3, 14.3; IR (neat, cm<sup>-1</sup>) 2908 (m), 1724 (s), 1449 (m), 1184 (s), 1154 (s), 1028 (m), 968 (s), 750 (s), 695 (s); HRMS (ESI<sup>+</sup>) [M+H]<sup>+</sup> calc'd for C<sub>18</sub>H<sub>20</sub>N<sub>2</sub>O<sub>2</sub>: 297.1598, found: 297.1603. [α]<sub>D</sub><sup>27</sup> = -14.8 (*c* = 1.0, CHCl<sub>3</sub>) for a sample of 95.5:4.5 er.

**HPLC:** Column: Lux amylose-1 (3 μm, 4.60 mm X 250 mm). Mobile phase: 5:95 *i*-PrOH:Hexanes, 1.0 mL/min. Detection wavelength: 254 nm. Er = 95.5:4.5.

&lt;Chromatogram&gt;

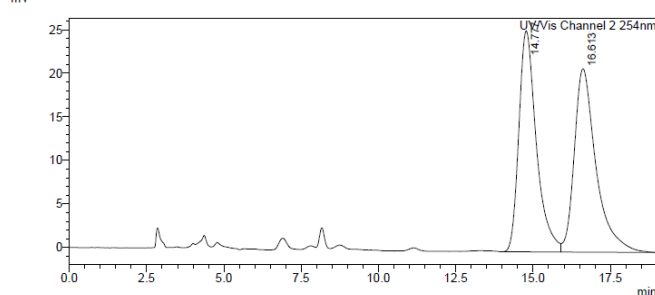

&lt;Peak Table&gt;

| Peak# | Ret. Time | Area    | Area%   |
|-------|-----------|---------|---------|
| 1     | 14.777    | 999355  | 49.230  |
| 2     | 16.613    | 1030616 | 50.770  |
| Total |           | 2029971 | 100.000 |

&lt;Chromatogram&gt;

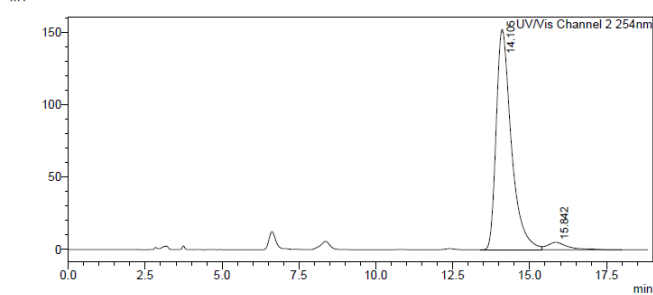

&lt;Peak Table&gt;

| Peak# | Ret. Time | Area    | Area%   |
|-------|-----------|---------|---------|
| 1     | 14.105    | 5200053 | 95.598  |
| 2     | 15.842    | 239446  | 4.402   |
| Total |           | 5439498 | 100.000 |

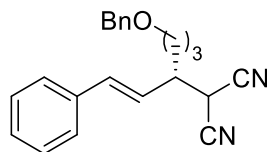**2i**

**(*S,E*)-2-(6-(Benzyloxy)-1-phenylhex-1-en-3-yl)malononitrile (2i):** Prepared by The General Method using **Pd-1** at 22 °C for 1 h. The material was purified by flash silica gel chromatography (100% hexanes to 80:20 hexanes:EtOAc) to yield **2i** as a colorless oil (50.0 mg, 0.151 mmol, 75.7% yield). **<sup>1</sup>H NMR** (500 MHz, CDCl<sub>3</sub>) δ 7.39–7.26 (10H, m), 6.62 (1H, d, *J* = 15.7 Hz), 5.98 (1H, dd, *J* = 15.7, 9.3 Hz), 4.43 (1H, d, *J*<sub>AB</sub> = 11.9 Hz), 4.42 (1H, d, *J*<sub>AB</sub> = 11.9 Hz), 3.82 (1H, d, *J* = 5.1 Hz), 3.49 (2H, t, *J* = 5.8 Hz), 2.86–2.80 (1H, m), 1.94–1.85 (1H, m), 1.82–1.69 (2H, m), 1.67–1.58 (1H, m); **<sup>13</sup>C NMR** (125 MHz, CDCl<sub>3</sub>) δ 138.2, 136.5, 135.6, 128.8, 128.6, 128.6, 127.8, 126.8, 124.6, 111.9, 111.6, 73.2, 69.3, 44.6, 29.4, 29.0, 27.1 (one sp<sup>2</sup> carbon missing due to overlap); **IR** (neat, cm<sup>-1</sup>) 2908 (m), 1724 (s), 1449 (m), 1184 (s), 1154 (s), 1028 (m), 968 (s), 750 (s), 695 (s); **HRMS** (ESI<sup>+</sup>) [M+H]<sup>+</sup> calc'd for C<sub>23</sub>H<sub>23</sub>N<sub>2</sub>O: 331.1805, found: 331.1811.

[α]<sub>D</sub><sup>27</sup> = -14.7 (*c* = 1.0, CHCl<sub>3</sub>) for a sample of 99.5:0.5 er.

**HPLC:** Column: Lux amylose-2 (3 μm, 4.60 mm X 250 mm). Mobile phase: 5:95 *i*-PrOH:Hexanes, 1.0 mL/min. Detection wavelength: 254 nm. Er = 99.5:0.5.

<Chromatogram>  
mV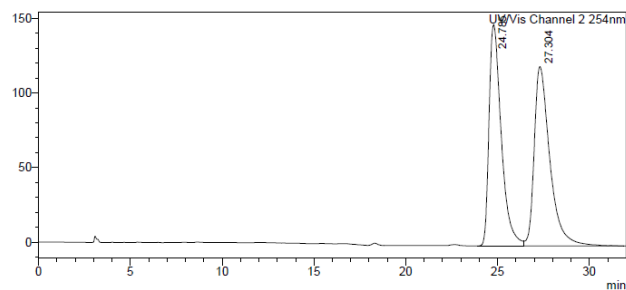

&lt;Peak Table&gt;

| UV/Vis Channel 2 254nm |           |          |         |
|------------------------|-----------|----------|---------|
| Peak#                  | Ret. Time | Area     | Area%   |
| 1                      | 24.785    | 6855604  | 49.029  |
| 2                      | 27.304    | 7127289  | 50.971  |
| Total                  |           | 13982894 | 100.000 |

<Chromatogram>  
mV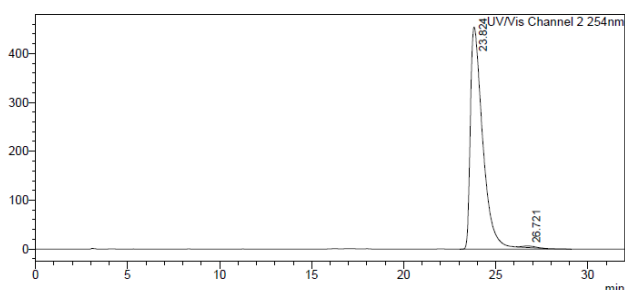

&lt;Peak Table&gt;

| UV/Vis Channel 2 254nm |           |          |         |
|------------------------|-----------|----------|---------|
| Peak#                  | Ret. Time | Area     | Area%   |
| 1                      | 23.824    | 21408564 | 99.310  |
| 2                      | 26.721    | 148823   | 0.690   |
| Total                  |           | 21557387 | 100.000 |

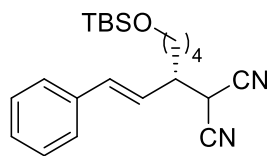**2j**

**(*S,E*)-2-(7-((*tert*-butyldimethylsilyloxy)-1-phenylhept-1-en-3-yl)malononitrile (**2j**):** Prepared by The General Method using **Pd-1** at 22 °C for 20 h. The material was purified by flash silica gel chromatography (100% hexanes to 90:10 hexanes:EtOAc) to yield **2j** as a colorless oil (60.0 mg, 0.163 mmol, 81.4% yield). <sup>1</sup>H NMR (400 MHz, CDCl<sub>3</sub>) δ 7.39 (2H, d, *J* = 6.9 Hz), 7.36–7.26 (3H, m), 6.66 (1H, d, *J* = 15.7 Hz), 5.99 (1H, dd, *J* = 15.8, 9.3 Hz), 3.78 (1H, d, *J* = 5.2 Hz), 3.59 (2H, t, *J* = 6.0 Hz), 2.85–2.78 (1H, m), 1.82–1.68 (2H, m), 1.58–1.34 (4H, m), 0.85 (9H, s), 0.01 (6H, s); <sup>13</sup>C NMR (125 MHz, CDCl<sub>3</sub>) δ 136.3, 135.6, 128.8, 128.6, 126.8, 124.8, 111.9, 111.7, 62.6, 44.9, 32.2, 32.1, 29.1, 26.0, 23.4, 18.4, -5.3; IR (neat, cm<sup>-1</sup>) 2928 (s), 2856 (m), 1462 (m), 1252 (s), 1097 (s), 967 (s), 834 (s), 774 (s), 748 (s), 694 (s); HRMS (ESI<sup>+</sup>) [M+H]<sup>+</sup> calc'd for C<sub>22</sub>H<sub>33</sub>N<sub>3</sub>OSi: 369.2357, found: 369.2360. [α]<sub>D</sub><sup>27</sup> = -15.1 (*c* = 1.0, CHCl<sub>3</sub>) for a sample of 96:4 er.

**HPLC:** Column: Lux Amylose-2 (3 μm, 4.60 mm X 250 mm). Mobile phase: 10:90 *i*-PrOH:Hexanes, 0.3 mL/min. Detection wavelength: 254 nm. Er = 96:4.

<Chromatogram>  
mV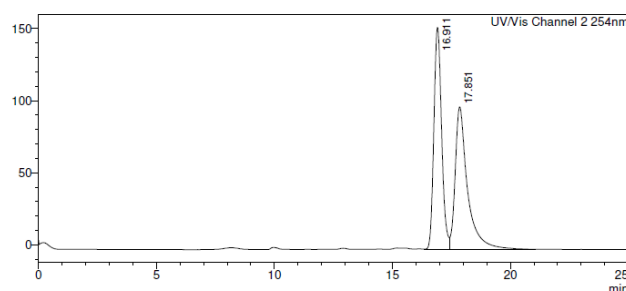

&lt;Peak Table&gt;

| UV/Vis Channel 2 254nm |           |         |         |
|------------------------|-----------|---------|---------|
| Peak#                  | Ret. Time | Area    | Area%   |
| 1                      | 16.911    | 3510119 | 49.486  |
| 2                      | 17.851    | 3583019 | 50.514  |
| Total                  |           | 7093139 | 100.000 |

<Chromatogram>  
mV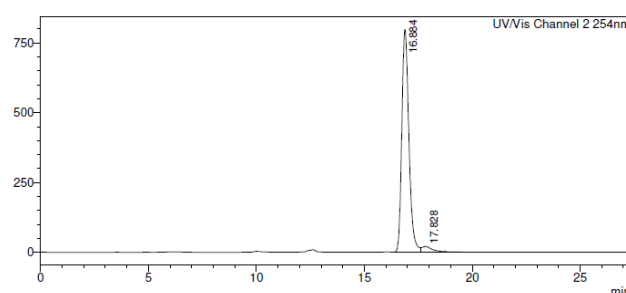

&lt;Peak Table&gt;

| UV/Vis Channel 2 254nm |           |          |         |
|------------------------|-----------|----------|---------|
| Peak#                  | Ret. Time | Area     | Area%   |
| 1                      | 16.884    | 18201887 | 95.999  |
| 2                      | 17.828    | 758604   | 4.001   |
| Total                  |           | 18960491 | 100.000 |



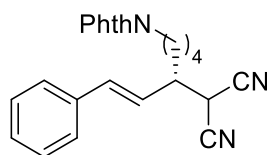**2k**

**(*S,E*)-2-(7-(1,3-dioxisoindolin-2-yl)-1-phenylhept-1-en-3-yl)malononitrile (2k)**: Prepared by The General Method using **Pd-1** at 22 °C for 20 h. The material was purified by flash silica gel chromatography (100% hexanes to 80:20 hexanes:EtOAc) to yield **2k** as a colorless oil (38.0 mg, 0.100 mmol, 49.6% yield). **<sup>1</sup>H NMR** (400 MHz, CDCl<sub>3</sub>) δ 7.78 (2H, dd, *J* = 5.4, 3.0 Hz), 7.67 (2H, dd, *J* = 5.5, 3.0 Hz), 7.35 (2H, dd, *J* = 8.0, 1.5 Hz), 7.33–7.25 (3H, m), 6.63 (1H, *J* = 15.7 Hz), 5.96 (1H, dd, *J* = 15.7, 9.4 Hz), 3.79 (1H, d, *J* = 5.3 Hz), 3.67 (2H, t, *J* = 7.0 Hz), 2.83–2.76 (1H, m), 1.87–1.62 (4H, m), 1.53–1.30 (2H, m); **<sup>13</sup>C NMR** (125 MHz, CDCl<sub>3</sub>) δ 168.4, 136.5, 135.5, 134.0, 132.0, 128.7, 128.5, 126.8, 124.5, 123.3, 111.8, 111.6, 44.7, 37.3, 31.6, 29.1, 28.0, 24.1; **IR** (neat, cm<sup>-1</sup>) 2937 (w), 1704 (s), 1437 (m), 1395 (s), 1371 (m), 1241 (m), 1044 (m), 968 (m), 718 (s); **HRMS** (ESI<sup>+</sup>) [M+H]<sup>+</sup> calc'd for C<sub>24</sub>H<sub>21</sub>N<sub>3</sub>O<sub>2</sub>: 384.1707, found: 384.1708.

[α]<sub>D</sub><sup>27</sup> = −15.2 (*c* = 1.0, CHCl<sub>3</sub>) for a sample of 90.5:9.5 er.

**HPLC**: Column: Lux Amylose-1 (3 μm, 4.60 mm X 250 mm). Mobile phase: 15:85 *i*-PrOH:Hexanes, 1.0 mL/min. Detection wavelength: 254 nm. Er = 90.5:9.5.

&lt;Chromatogram&gt;

mV

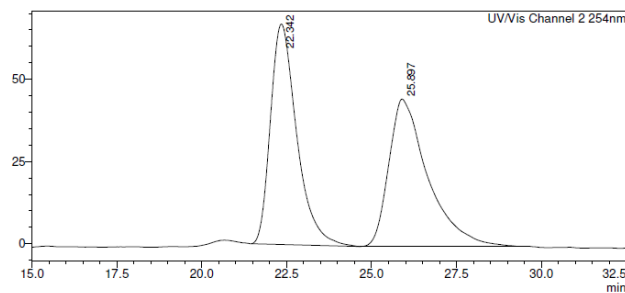

&lt;Peak Table&gt;

UV/Vis Channel 2 254nm

| Peak# | Ret. Time | Area    | Area%   |
|-------|-----------|---------|---------|
| 1     | 22.342    | 3607326 | 50.191  |
| 2     | 25.897    | 3579804 | 49.809  |
| Total |           | 7187130 | 100.000 |

&lt;Chromatogram&gt;

mV

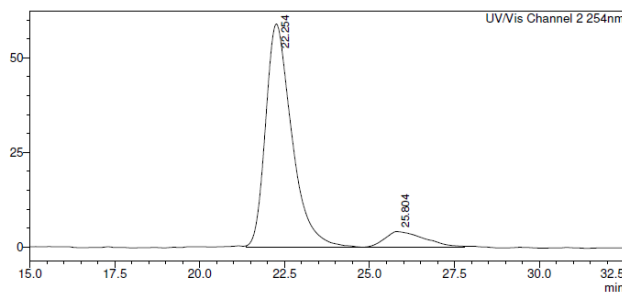

&lt;Peak Table&gt;

UV/Vis Channel 2 254nm

| Peak# | Ret. Time | Area    | Area%   |
|-------|-----------|---------|---------|
| 1     | 22.254    | 3173875 | 90.451  |
| 2     | 25.804    | 335068  | 9.549   |
| Total |           | 3508944 | 100.000 |

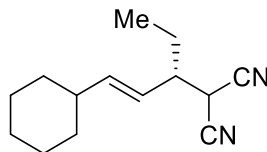**2I**

**(*S,E*)-2-(1-Cyclohexylpent-1-en-3-yl)malononitrile (2I):** Prepared by The General Method using **Pd-1** at 22 °C for 3 h. The material was purified by flash silica gel chromatography (100% hexanes to 90:10 hexanes:EtOAc) to yield **2I** as a colorless oil (31.0 mg, 0.143 mmol, 71.6 % yield). **<sup>1</sup>H NMR** (400 MHz, CDCl<sub>3</sub>) δ 5.71 (1H, dd, *J* = 15.4, 6.8 Hz), 5.19 (1H, dd, *J* = 15.4, 9.1 Hz), 3.65 (1H, d, *J* = 5.6 Hz), 2.49–2.42 (1H, m), 2.04–1.96 (1H, m), 1.78–1.46 (7H, m), 1.33–1.01 (6H, m), 0.93 (3H, t, *J* = 7.4 Hz); **<sup>13</sup>C NMR** (125 MHz, CDCl<sub>3</sub>) δ 144.1, 122.9, 112.1, 111.9, 46.0, 40.7, 32.8, 29.1, 26.1, 25.9, 25.3, 11.4; **IR** (neat, cm<sup>-1</sup>) 2966 (m), 2923 (s), 2851 (s), 1461 (s), 1350 (w), 970 (s), 891 (w); **HRMS** (ESI<sup>+</sup>) [M+H]<sup>+</sup> calc'd for C<sub>14</sub>H<sub>21</sub>N<sub>2</sub>: 217.1699, found: 217.1699.

[α]<sub>D</sub><sup>27</sup> = −14.8 (*c* = 1.0, CHCl<sub>3</sub>) for a sample of 94:6 er.

**HPLC:** Column: Lux amylose-2 (3 μm, 4.60 mm X 250 mm). Mobile phase: 10:90 *i*-PrOH:Hexanes, 1.0 mL/min. Detection wavelength: 200 nm. Er = 94:6.

<Chromatogram>  
mV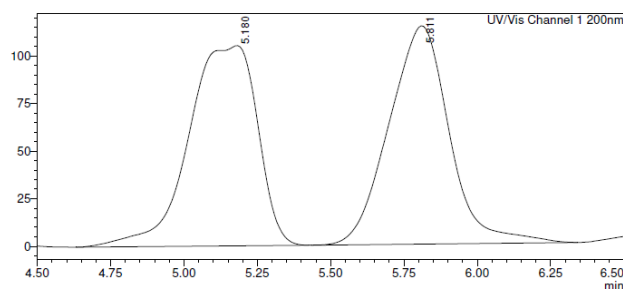

&lt;Peak Table&gt;

| UV/Vis Channel 1 200nm |           |         |         |
|------------------------|-----------|---------|---------|
| Peak#                  | Ret. Time | Area    | Area%   |
| 1                      | 5.180     | 1716708 | 51.085  |
| 2                      | 5.811     | 1643806 | 48.915  |
| Total                  |           | 3360514 | 100.000 |

<Chromatogram>  
mV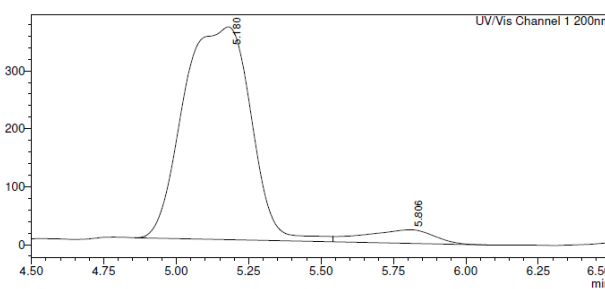

&lt;Peak Table&gt;

| UV/Vis Channel 1 200nm |           |         |         |
|------------------------|-----------|---------|---------|
| Peak#                  | Ret. Time | Area    | Area%   |
| 1                      | 5.180     | 5948483 | 93.968  |
| 2                      | 5.806     | 381832  | 6.032   |
| Total                  |           | 6330315 | 100.000 |

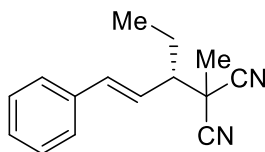**5a**

**(*S,E*)-2-Methyl-2-(1-phenylpent-1-en-3-yl)malononitrile (5a):** Prepared by The General Method using **Pd-1** at 22 °C for 1 h. The material was purified by flash silica gel chromatography (100% hexanes to 80:20 hexanes:EtOAc) to yield **5a** as a colorless oil (44.5 mg, 0.199 mmol, 99.2% yield). **<sup>1</sup>H NMR** (500 MHz, CDCl<sub>3</sub>) δ 7.39 (2H, dd, *J* = 6.7, 6.7 Hz), 7.34 (2H, d, *J* = 7.4, 7.4 Hz), 7.28 (1H, t, *J* = 7.2 Hz), 6.59 (1H, d, *J* = 15.7 Hz), 5.89 (1H, dd, *J* = 15.7, 9.7 Hz), 2.45–2.39 (1H, m), 2.09–2.00 (1H, m), 1.76 (3H, s), 1.73–1.62 (1H, m), 0.99 (3H, t, *J* = 7.4 Hz); **<sup>13</sup>C NMR** (125 MHz, CDCl<sub>3</sub>) δ 137.5, 135.7, 128.8, 128.6, 126.7, 123.7, 116.2, 115.4, 53.1, 36.4, 24.6, 23.6, 11.9; **IR** (neat, cm<sup>-1</sup>) 3028 (w), 2969 (m), 2933 (m), 2877 (w), 1451 (s), 1382 (m), 1129 (m), 970 (s), 910 (s), 755 (s), 691 (s); **HRMS** (ESI<sup>+</sup>) [M+H]<sup>+</sup> calc'd for C<sub>15</sub>H<sub>17</sub>N<sub>2</sub>: 225.1386, found: 225.1392.

[α]<sub>D</sub><sup>27</sup> = -14.8 (*c* = 1.0, CHCl<sub>3</sub>) for a sample of 96:4 er.

**HPLC:** Column: Lux amylose-1 (3 μm, 4.60 mm X 250 mm). Mobile phase: 5:95 *i*-PrOH:Hexanes, 0.7 mL/min. Detection wavelength: 254 nm. Er = 96:4.

<Chromatogram>  
mV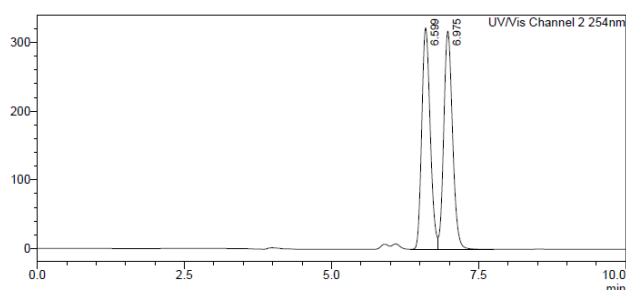

&lt;Peak Table&gt;

| UV/Vis Channel 2 254nm |           |         |         |
|------------------------|-----------|---------|---------|
| Peak#                  | Ret. Time | Area    | Area%   |
| 1                      | 6.599     | 3242115 | 49.427  |
| 2                      | 6.975     | 3317264 | 50.573  |
| Total                  |           | 6559380 | 100.000 |

<Chromatogram>  
mV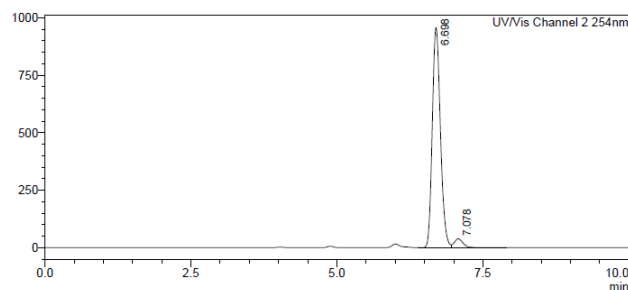

&lt;Peak Table&gt;

| UV/Vis Channel 2 254nm |           |         |         |
|------------------------|-----------|---------|---------|
| Peak#                  | Ret. Time | Area    | Area%   |
| 1                      | 6.698     | 9299039 | 95.803  |
| 2                      | 7.078     | 407406  | 4.197   |
| Total                  |           | 9706444 | 100.000 |

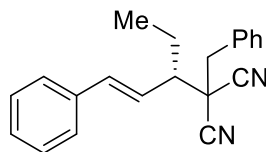**5b**

**(*S,E*)-2-Benzyl-2-(1-phenylpent-1-en-3-yl)malononitrile (5b):** Prepared by General Method C using **Pd-1** at 22 °C for 1 h. The material was purified by flash silica gel chromatography (100% hexanes to 90:10 hexanes:EtOAc) to yield **5b** as a white solid (54.0 mg, 0.180 mmol, 89.9% yield). <sup>1</sup>H NMR (400 MHz, CDCl<sub>3</sub>) δ 7.52–7.27 (10H, m), 6.64 (1H, d, *J* = 15.7 Hz), 6.03 (1H, dd, *J* = 15.7, 9.8 Hz), 3.27 (1H d, *J*<sub>AB</sub> = 13.8 Hz), 3.09 (1H d, *J*<sub>AB</sub> = 13.8 Hz), 2.61–2.51 (1H, m), 2.18–2.09 (1H, m), 1.82–71 (1H, m), 1.02 (3H, t, *J* = 7.4 Hz); <sup>13</sup>C NMR (125 MHz, CDCl<sub>3</sub>) δ 137.5, 135.6, 132.4, 130.2, 128.9, 128.8, 128.7, 128.6, 126.7, 123.9, 115.1, 114.4, 52.1, 44.6, 42.1, 24.8, 11.8. Spectral data matched those previously reported.<sup>7</sup>

$[\alpha]_D^{27} = -15.2$  (*c* = 1.0, CHCl<sub>3</sub>) for a sample of 95.5:4.5 er.

Compound **5b** was prepared in reference 7 in enantiomerically enriched form. The sign of the rotation in that reference is the opposite to what we observed for **2a** in this work. Thus, we have assigned **2a** as the (*R*)-enantiomer and make all other stereochemical assignments by inference. The observed enantiomer matches that in our terminal diene hydroalkylation as well; see reference 3.

**HPLC:** Column: Lux cellulose-1 (3 μm, 4.60 mm X 250 mm). Mobile phase: 10:90 *i*-PrOH:Hexanes, 1.0 mL/min. Detection wavelength: 254 nm. Er = 95.5:4.5.

<Chromatogram>  
mV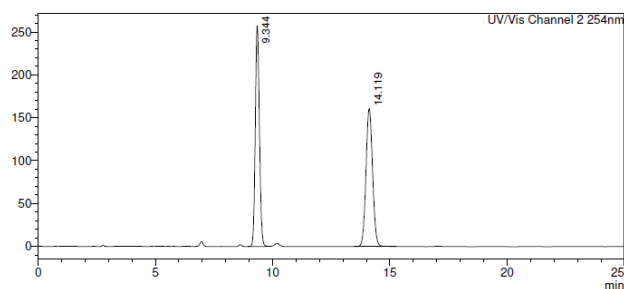

&lt;Peak Table&gt;

| UV/Vis Channel 2 254nm |           |         |         |
|------------------------|-----------|---------|---------|
| Peak#                  | Ret. Time | Area    | Area%   |
| 1                      | 9.344     | 3139523 | 49.876  |
| 2                      | 14.119    | 3155171 | 50.124  |
| Total                  |           | 6294694 | 100.000 |

<Chromatogram>  
mV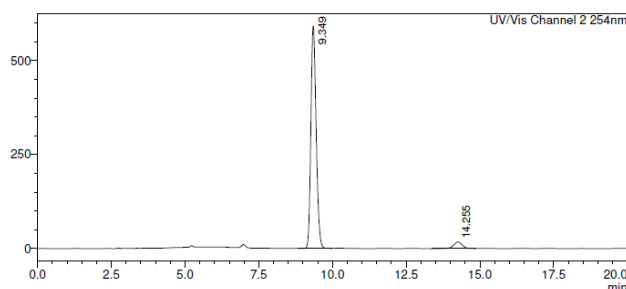

&lt;Peak Table&gt;

| UV/Vis Channel 2 254nm |           |         |         |
|------------------------|-----------|---------|---------|
| Peak#                  | Ret. Time | Area    | Area%   |
| 1                      | 9.349     | 7381907 | 95.532  |
| 2                      | 14.255    | 345226  | 4.468   |
| Total                  |           | 7727132 | 100.000 |

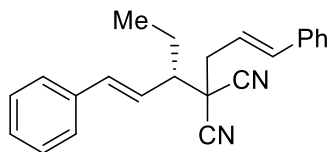**5c**

**2-Cinnamyl-2-((*S,E*)-1-(4-methoxyphenyl)pent-1-en-3-yl)malononitrile (5c):** Prepared by The General Method using **Pd-1** at 22 °C for 1 h. The material was purified by flash silica gel chromatography (100% hexanes to 90:10 hexanes:EtOAc) to yield **5c** as a colorless oil (51.0 mg, 0.156 mmol, 78.1% yield). <sup>1</sup>H NMR (400 MHz, CDCl<sub>3</sub>) δ 7.48–7.27 (10H, m), 6.67 (1H, d, *J* = 15.7 Hz), 6.62 (1H d, *J* = 15.7 Hz), 6.25 (1H, dt, *J* = 15.4, 7.4 Hz), 5.97 (1H, dd, *J* = 15.7, 9.8 Hz), 2.93 (1H, dd, *J*<sub>AB</sub> = 13.6, *J*<sub>AX</sub> = 6.6 Hz), 2.80 (1H, dd, *J*<sub>AB</sub> = 13.9, *J*<sub>AX</sub> = 7.8 Hz), 2.60–2.52 (1H, m), 2.15–2.04 (1H, m), 1.81–1.70 (1H, m), 1.01 (3H, t, *J* = 7.3 Hz); <sup>13</sup>C NMR (125 MHz, CDCl<sub>3</sub>) δ 137.6, 137.4, 135.9, 135.6, 128.8, 128.7, 128.6, 128.4, 126.69, 126.67, 123.7, 119.4, 115.2, 114.5, 51.3, 42.7, 39.8, 24.7, 11.8; IR (neat, cm<sup>-1</sup>) 3027 (m), 2967 (m), 2931 (m), 1494 (s), 1449 (s), 1355 (m), 966 (s), 908 (s), 731 (s), 691 (s); HRMS (ESI<sup>+</sup>) [M+NH<sub>4</sub>]<sup>+</sup> calc'd for C<sub>23</sub>H<sub>26</sub>N<sub>3</sub>: 344.2121, found: 344.2119.

[α]<sub>D</sub><sup>27</sup> = −15.7 (*c* = 1.0, CHCl<sub>3</sub>) for a sample of 95.5:4.5 er.

**HPLC:** Column: Lux cellulose-1 (3 μm, 4.60 mm X 250 mm). Mobile phase: 10:90 *i*-PrOH:Hexanes, 1.0 mL/min. Detection wavelength: 254 nm. Er = 95.5:4.5.

<Chromatogram>  
mV

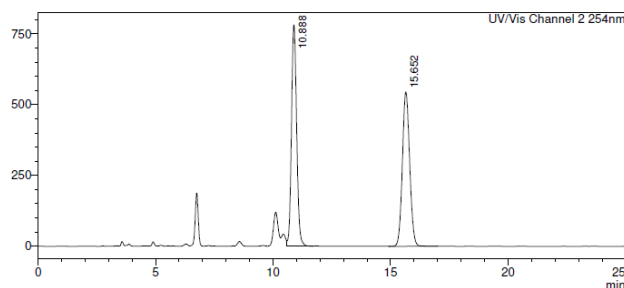

<Peak Table>

| UV/Vis Channel 2 254nm |           |          |         |
|------------------------|-----------|----------|---------|
| Peak#                  | Ret. Time | Area     | Area%   |
| 1                      | 10.888    | 11938209 | 50.416  |
| 2                      | 15.652    | 11741344 | 49.584  |
| Total                  |           | 23679553 | 100.000 |

<Chromatogram>  
mV

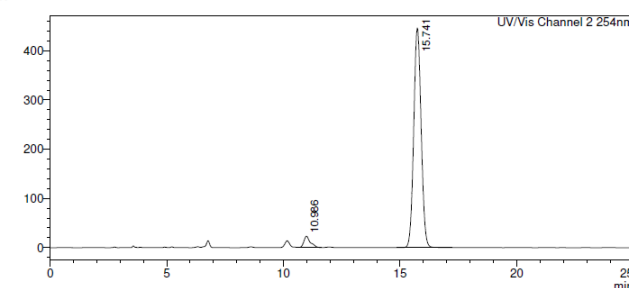

<Peak Table>

| UV/Vis Channel 2 254nm |           |          |         |
|------------------------|-----------|----------|---------|
| Peak#                  | Ret. Time | Area     | Area%   |
| 1                      | 10.986    | 447330   | 4.350   |
| 2                      | 15.741    | 9835190  | 95.650  |
| Total                  |           | 10282520 | 100.000 |

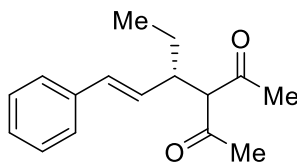**5d**

**(*S,E*)-3-(1-Phenylpent-1-en-3-yl)pentane-2,4-dione (5d):** Prepared by The General Method using **Pd-1** at 22 °C for 20 h. The material was purified by flash silica gel chromatography (100% hexanes to 90:10 hexanes:EtOAc) to yield **5d** as a white solid (25.0 mg, 0.102 mmol, 51.2 % yield). **<sup>1</sup>H NMR** (400 MHz, CDCl<sub>3</sub>)  $\delta$  7.36–7.25 (4H, m), 7.22–7.16 (1H, m), 6.42 (1H, d,  $J$  = 15.8 Hz), 5.82 (1H, dd,  $J$  = 15.8, 9.5 Hz), 3.76 (1H, d,  $J$  = 10.6 Hz), 2.98–2.89 (1H, m), 2.21 (3H, s), 2.09 (3H, s), 1.49–1.41 (1H, m), 1.30–1.20 (1H, m), 0.87 (3H, t,  $J$  = 7.4 Hz); **<sup>13</sup>C NMR** (125 MHz, CDCl<sub>3</sub>)  $\delta$  203.7, 203.6, 136.8, 133.0, 129.0, 128.6, 127.6, 126.3, 74.7, 45.4, 30.3, 29.7, 26.1, 11.6; **IR** (neat, cm<sup>-1</sup>) 2936 (m), 1688 (s), 1459 (m), 1356 (s), 1277 (s), 1198 (s), 1151 (s), 982 (s), 743 (s), 687 (s); **MP** = 37–38 °C; **HRMS** (ESI<sup>+</sup>) [M+NH<sub>4</sub>]<sup>+</sup> calc'd for C<sub>16</sub>H<sub>24</sub>NO<sub>2</sub>: 262.1802, found: 262.1801.

**[ $\alpha$ ]<sub>D</sub><sup>27</sup>** = -17.3 ( $c$  = 1.0, CHCl<sub>3</sub>) for a sample of 92.5:7.5 er.

**HPLC:** Column: Lux cellulose-3 (3  $\mu$ m, 4.60 mm X 250 mm). Mobile phase: 5:95 *i*-PrOH:Hexanes, 1.0 mL/min. Detection wavelength: 254 nm. Er = 92.5:7.5.

<Chromatogram>  
mV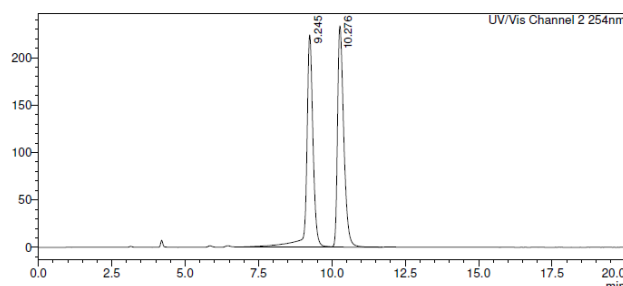

&lt;Peak Table&gt;

| UV/Vis Channel 2 254nm |           |         |         |
|------------------------|-----------|---------|---------|
| Peak#                  | Ret. Time | Area    | Area%   |
| 1                      | 9.245     | 3385379 | 49.595  |
| 2                      | 10.276    | 3440605 | 50.405  |
| Total                  |           | 6825984 | 100.000 |

<Chromatogram>  
mV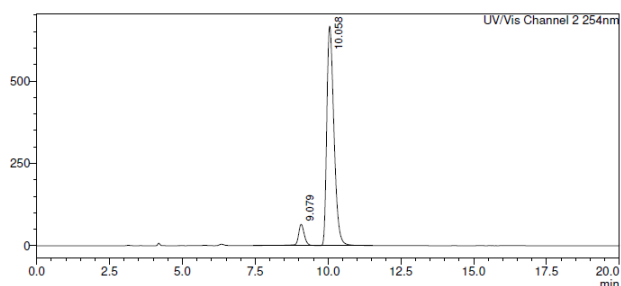

&lt;Peak Table&gt;

| UV/Vis Channel 2 254nm |           |          |         |
|------------------------|-----------|----------|---------|
| Peak#                  | Ret. Time | Area     | Area%   |
| 1                      | 9.079     | 933263   | 7.600   |
| 2                      | 10.058    | 11346803 | 92.400  |
| Total                  |           | 12280066 | 100.000 |

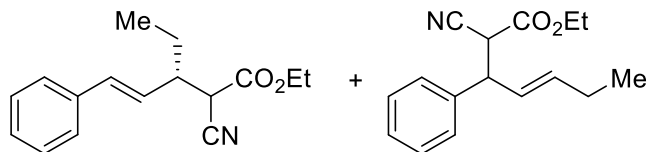**5e + 6e**

**Ethyl (3*S*,*E*)-2-cyano-3-ethyl-5-phenylpent-4-enoate (5e) and ethyl (*E*)-2-cyano-3-methyl-6-phenylhex-4-enoate (6e):** Prepared by General Method using **Pd-1** at 22 °C for 20 h. The material was purified by flash silica gel chromatography (100% hexanes to 90:10 hexanes:EtOAc) to yield (60:40 **5e:6e**) as a colorless oil (28.8 mg, 0.112 mmol, 56.0 % yield). **5e** (60:40 dr): **<sup>1</sup>H NMR** (500 MHz, CDCl<sub>3</sub>) δ 7.35–7.22 (5H, m), 6.52 (0.4H, d, *J* = 15.8 Hz), 6.48 (0.6H, d, *J* = 15.7 Hz), 6.04 (0.6H, dd, *J* = 15.7, 9.6 Hz), 5.97 (0.4H, dd, *J* = 15.7, 9.4 Hz), 4.26–4.11 (2.4H, m), 3.64 (0.6 H, d, *J* = 4.6 Hz), 3.53 (0.4H, d, *J* = 6.5 Hz), 2.84–2.78 (1H, m), 2.10–2.02 (0.6H, m), 1.80–1.54 (1.4H, m), 1.26 (1.2H, t, *J* = 7.1 Hz), 1.21 (1.8H, t, *J* = 7.1 Hz), 0.97 (1.8H, t, *J* = 7.3 Hz), 0.94 (1.2H, t, *J* = 7.4 Hz); **6e**: **<sup>1</sup>H NMR** (500 MHz, CDCl<sub>3</sub>) δ 7.35–7.22 (5H, m), 5.76–5.69 (2H, m), 4.26–4.11 (4H, m), 4.00–3.94 (1H, m), 3.78–3.74 (1H, m), 1.31–1.15 (3H, m), 1.00–0.93 (3H, m); **5e** and **6e** mixture: **<sup>13</sup>C NMR** (125 MHz, CDCl<sub>3</sub>) δ 165.6, 165.4, 165.1, 139.3, 138.7, 137.5, 136.4, 136.3, 134.3, 134.0, 129.0, 128.9, 127.8, 127.6, 126.7, 126.5, 125.3, 115.7, 115.6, 115.3, 62.8, 62.7, 49.2, 49.1, 46.0, 45.9, 45.2, 44.8, 43.7, 43.3, 26.4, 25.6, 25.5, 14.1, 14.0, 13.4, 11.8, 11.6; **5e** and **6e** mixture: **IR** (neat, cm<sup>-1</sup>) 2965 (m), 2932 (m), 2875 (w), 1740 (s), 1450 (m), 1368 (m), 1247 (s), 1189 (s), 1029 (s), 967 (s), 748 (s), 694 (s); **HRMS** (ESI<sup>+</sup>) [M+H]<sup>+</sup> calc'd for C<sub>16</sub>H<sub>20</sub>O<sub>2</sub>N: 258.1489, found: 258.1490.

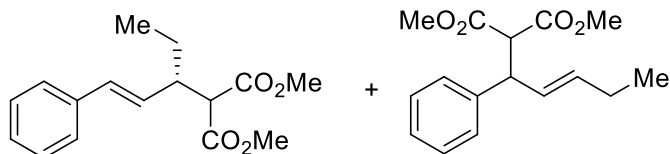**5f + 6f**

**Dimethyl (*S,E*)-2-(1-phenylpent-1-en-3-yl)malonate (5f) and dimethyl (*E*)-2-(5-phenylpent-3-en-2-yl)malonate (6f):** Prepared by The General Method using **Pd-1** at 22 °C for 20 h. The material was purified by flash silica gel chromatography (100% hexanes to 90:10 hexanes:EtOAc) to yield (57:43 **5f:6f**) as a colorless oil (27.1 mg, 0.0980 mmol, 49.0 % yield). **5f:**  $^1\text{H NMR}$  (500 MHz,  $\text{CDCl}_3$ )  $\delta$  7.38–7.23 (5H, m), 6.48 (1H, d,  $J = 15.8$  Hz), 6.03 (1H, dd,  $J = 15.8, 9.6$  Hz), 3.77 (3H, s), 3.51–3.49 (1H, m), 2.92–2.86 (1H, m), 1.65–1.38 (2H, m), 1.01–0.91 (3H, m). **6f:**  $^1\text{H NMR}$  (500 MHz,  $\text{CDCl}_3$ )  $\delta$  7.38–7.23 (5H, m), 5.64–5.58 (2H, m), 4.09–4.04 (1H, m), 3.85 (1H, d,  $J = 11.1$  Hz), 3.75 (3H, s), 3.51 (3H, s), 2.02–1.98 (2H, m), 0.98–0.92 (3H, m); **HRMS** (ESI $^+$ )  $[\text{M}+\text{H}]^+$  calc'd for  $\text{C}_{16}\text{H}_{20}\text{O}_4$ : 277.1434, found: 277.1437. Spectral data matched those previously reported.<sup>8</sup>



## V. Additional Experiments

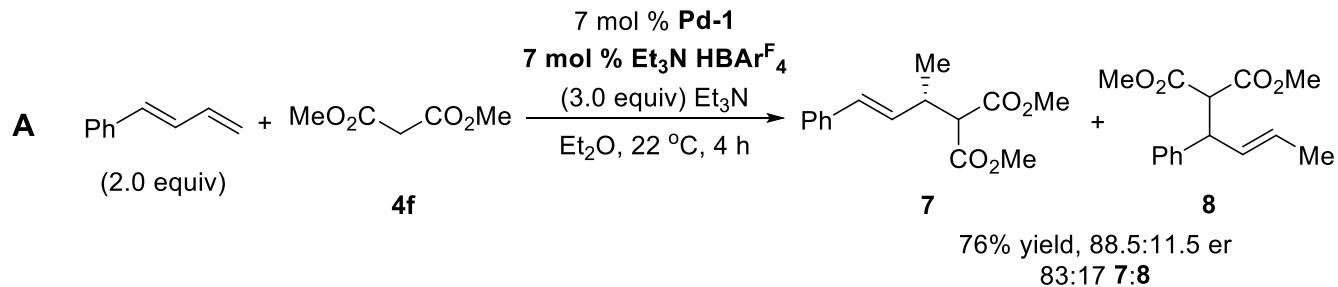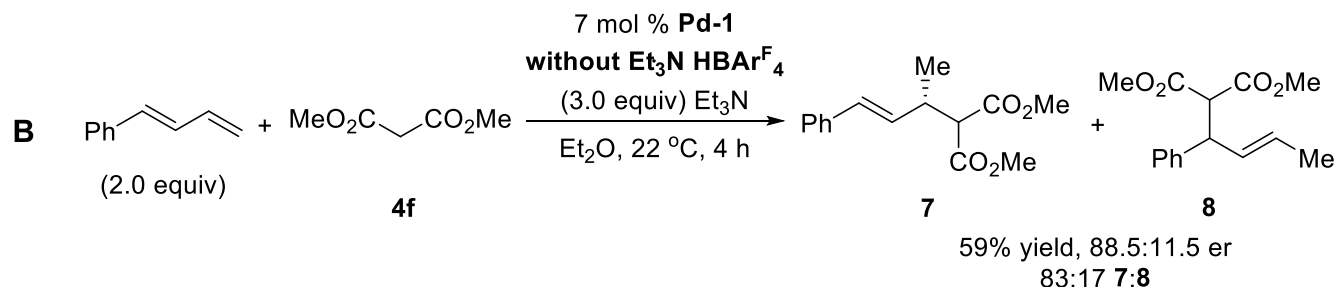

**Dimethyl (*S,E*)-2-(4-phenylbut-3-en-2-yl)malonate (7):** Prepared by The General Method using Pd-1 with dimethyl malonate (26.2 mg, 0.200 mmol, 1.0 equiv) at 22 °C for 4 h. The material was purified by flash silica gel chromatography (100% hexanes to 90:10 hexanes:EtOAc) to yield (83:17 **8:9**) as a colorless oil (40.0 mg, 0.152 mmol, 76.2% yield). **7**: <sup>1</sup>H NMR (500 MHz, CDCl<sub>3</sub>) δ 7.31 (2H, d, *J* = 7.2 Hz), 7.27 (2H, dd, *J* = 7.6, 7.6 Hz), 7.22–7.16 (1H, m), 6.43 (1H, d, *J* = 15.8 Hz), 6.10 (1H, dd, *J* = 15.8, 8.5 Hz), 3.73 (3H, s), 3.65 (3H, s), 3.38 (1H, d, *J* = 8.9 Hz), 3.15–3.06 (1H, m), 1.17 (3H, d, *J* = 6.8 Hz); **8**: <sup>1</sup>H NMR (500 MHz, CDCl<sub>3</sub>) δ 7.28–7.18 (5H, m), 5.63–5.50 (2H, m), 4.05–3.99 (1H, m), 3.80 (1H, d, *J* = 11.0 Hz), 3.71 (s, 3H), 3.46 (s, 3H), 1.61 (d, *J* = 5.3 Hz, 3H); **HRMS** (ESI<sup>+</sup>) [*M*+*H*]<sup>+</sup> calc'd for C<sub>15</sub>H<sub>19</sub>O<sub>4</sub>: 263.1278, found: 263.1282. Spectral data matched those previously reported.<sup>9</sup> [*α*]<sub>D</sub><sup>27</sup> = −15.8 (*c* = 1.0, CHCl<sub>3</sub>) for a sample of 88.5:11.5 er.

**HPLC:** Column: Lux amylose-1 (3 μm, 4.60 mm X 250 mm). Mobile phase: 97:3 *i*-PrOH: Hexanes, 0.8 mL/min. Detection wavelength: 254 nm. **A-2e**: Er = 88.5:11.5; **B-2e**: Er = 88.5:11.5.

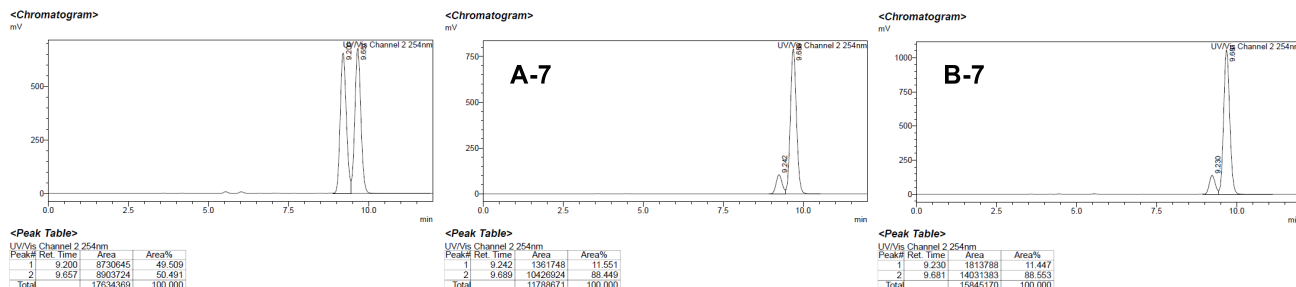

## VI. Product Derivatizations

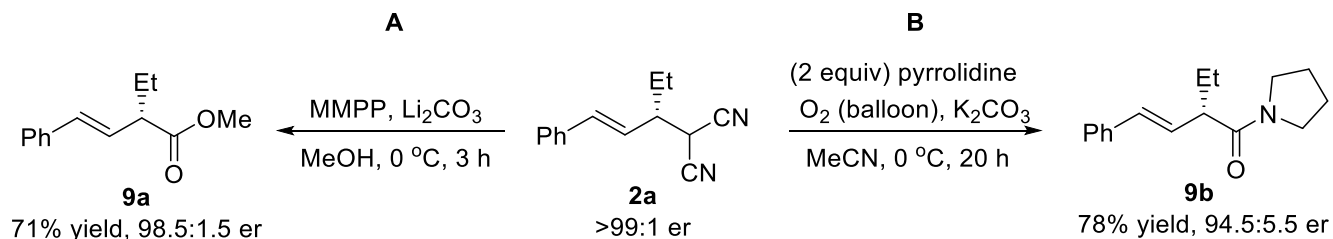

**Application A: Methyl (*S,E*)-2-ethyl-4-phenylbut-3-enoate (**9a**):** Compound **9a** was prepared according to a previously established method.<sup>10</sup> To a 2-dram vial equipped with a magnetic stirring rod were added **2a** (42.1 mg, 0.200 mmol, 1.00 equiv) and  $\text{Li}_2\text{CO}_3$  (22.0 mg, 0.300 mmol, 1.50 equiv). The mixture was suspended in MeOH (1.3 mL) and allowed to cool to 0 °C. To this mixture was added magnesium monoperoxyphthalate (MMPP, 80% tech grade, 72.5 mg, 0.150 mmol, 0.750 equiv). After allowing to stir vigorously at 0 °C for 3 h, the suspension was filtered through a pad of celite followed by a plug of silica gel (eluting with excess  $\text{Et}_2\text{O}$  in both cases) and then the filtrate was concentrated *in vacuo*. The material was purified by flash silica gel chromatography (100% hexanes to 95:5 hexanes:EtOAc) to yield **9a** as a colorless oil (29.0 mg, 0.142 mmol, 71.0% yield). **<sup>1</sup>H NMR** (500 MHz,  $\text{CDCl}_3$ )  $\delta$  7.35 (2H, d,  $J = 7.4$  Hz), 7.29 (2H, dd,  $J = 7.6, 7.6$  Hz), 7.21 (1H, t,  $J = 7.3$  Hz), 6.45 (1H, d,  $J = 15.9$  Hz), 6.17 (1H, dd,  $J = 15.9, 9.0$  Hz), 3.69 (3H, s), 3.07 (1H, ddd,  $J = 7.4, 7.4, 7.4$  Hz), 1.90–1.61 (1H, m), 1.70–1.60 (1H, m), 0.93 (3H, t,  $J = 7.4$  Hz); **<sup>13</sup>C NMR** (125 MHz,  $\text{CDCl}_3$ )  $\delta$  174.6, 136.9, 132.4, 128.6, 127.6, 127.6, 126.4, 51.9, 51.3, 26.0, 11.8; **IR** (neat,  $\text{cm}^{-1}$ ) 3026 (w), 2964 (m), 2932 (m), 2875 (w), 1732 (s), 1449 (m), 1160 (s), 965 (s), 742 (s), 692 (s); **HRMS** (ESI<sup>+</sup>)  $[\text{M}+\text{H}]^+$  calc'd for  $\text{C}_{13}\text{H}_{16}\text{O}_2$ : 205.1223 found: 205.1226.  $[\alpha]_{\text{D}}^{27} = -14.8$  ( $c = 1.0$ ,  $\text{CHCl}_3$ ) for a sample of 98.5:1.5 er.

**HPLC:** Column: Lux cellulose-1 (3  $\mu\text{m}$ , 4.60 mm X 250 mm). Mobile phase: 10:90 *i*-PrOH:Hexanes, 1.0 mL/min. Detection wavelength: 254 nm. Er = 98.5:1.5.

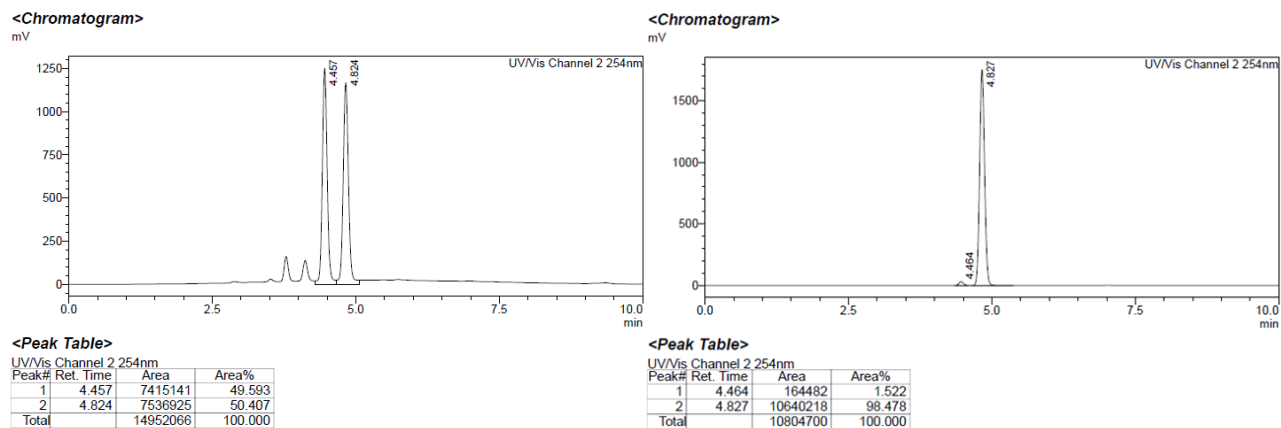

**Application B: (*S,E*)-2-Ethyl-4-phenyl-1-(pyrrolidin-1-yl)but-3-en-1-one (**9b**):** Compound **9b** was prepared according to a previously established method.<sup>11</sup> To a 2-dram vial equipped with a magnetic stirring rod was added a solution of **2a** (42.1 mg, 0.200 mmol, 1.00 equiv) in CH<sub>3</sub>CN (2.0 mL). Then, oxygen (balloon) was bubbled through the solution for 5 min at 0 °C. Pyrrolidine (28.5 mg, 0.400 mmol, 2.00 equiv) and K<sub>2</sub>CO<sub>3</sub> (55.3 mg, 0.400 mmol, 2.00 equiv) were added in one-portion sequentially. The atmosphere was refreshed under oxygen (balloon) at 0 °C. After allowing the mixture to stir for 20 h at 0 °C, CHCl<sub>3</sub> (2 mL) was added and the precipitate filtered through a short silica gel column and then the filtrate was concentrated *in vacuo*. The material was purified by flash silica gel chromatography (90:10 hexanes:EtOAc to 50:50 hexanes:EtOAc) to yield **9b** as a colorless oil (38.0 mg, 0.156 mmol, 78.0% yield). <sup>1</sup>H NMR (500 MHz, CDCl<sub>3</sub>) δ 7.34 (2H, d, *J* = 7.3 Hz), 7.27 (2H, dd, *J* = 7.6, 7.6 Hz), 7.19 (1H, t, *J* = 7.3 Hz), 6.40 (1H, d, *J* = 15.9 Hz), 6.21 (1H, dd, *J* = 15.9, 9.0 Hz), 3.56–3.43 (4H, m), 3.14–3.08 (1H, m), 1.97–1.77 (5H, m), 1.67–1.58 (1H, m), 0.91 (3H, t, *J* = 7.4 Hz); <sup>13</sup>C NMR (125 MHz, CDCl<sub>3</sub>) δ 171.9, 137.0, 131.5, 129.1, 128.5, 127.4, 126.3, 50.6, 46.4, 45.9, 26.1, 25.9, 24.3, 12.0; IR (neat, cm<sup>-1</sup>) 2964 (s), 2872 (s), 1624 (s), 1427 (s), 968 (m), 910 (m), 727 (s), 692 (s); HRMS (ESI<sup>+</sup>) [M+H]<sup>+</sup> calc'd for C<sub>16</sub>H<sub>21</sub>ON: 244.1696, found: 244.1701.

$[\alpha]_D^{27} = -14.9$  (*c* = 1.0, CHCl<sub>3</sub>) for a sample of 94.5:5.5 er.

**HPLC:** Column: Lux cellulose-1 (3 μm, 4.60 mm X 250 mm). Mobile phase: 10:90 *i*-PrOH:Hexanes, 1.0 mL/min. Detection wavelength: 254 nm. Er = 94.5:5.5.

<Chromatogram>

mV

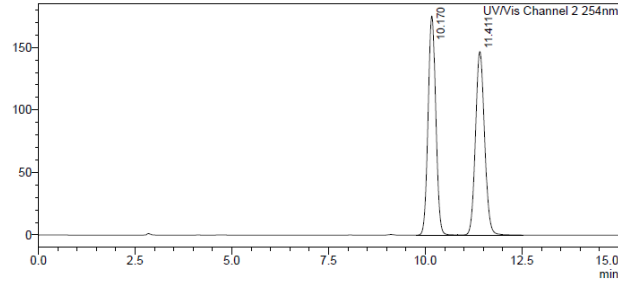

<Peak Table>

| Peak# | Ret. Time | Area    | Area%   |
|-------|-----------|---------|---------|
| 1     | 10.170    | 2416247 | 50.090  |
| 2     | 11.411    | 2407563 | 49.910  |
| Total |           | 4823810 | 100.000 |

<Chromatogram>

mV

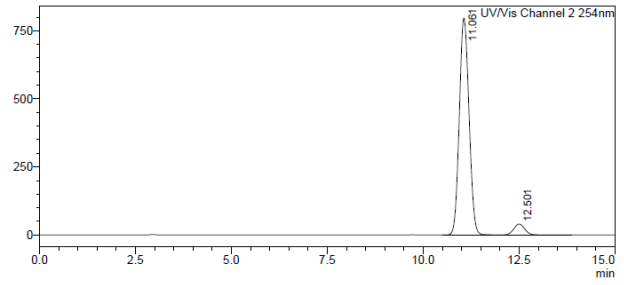

<Peak Table>

| Peak# | Ret. Time | Area     | Area%   |
|-------|-----------|----------|---------|
| 1     | 11.061    | 14059266 | 94.524  |
| 2     | 12.501    | 814479   | 5.476   |
| Total |           | 14873745 | 100.000 |

## VII. Reaction Outcome Dependence on Diene Stereochemistry

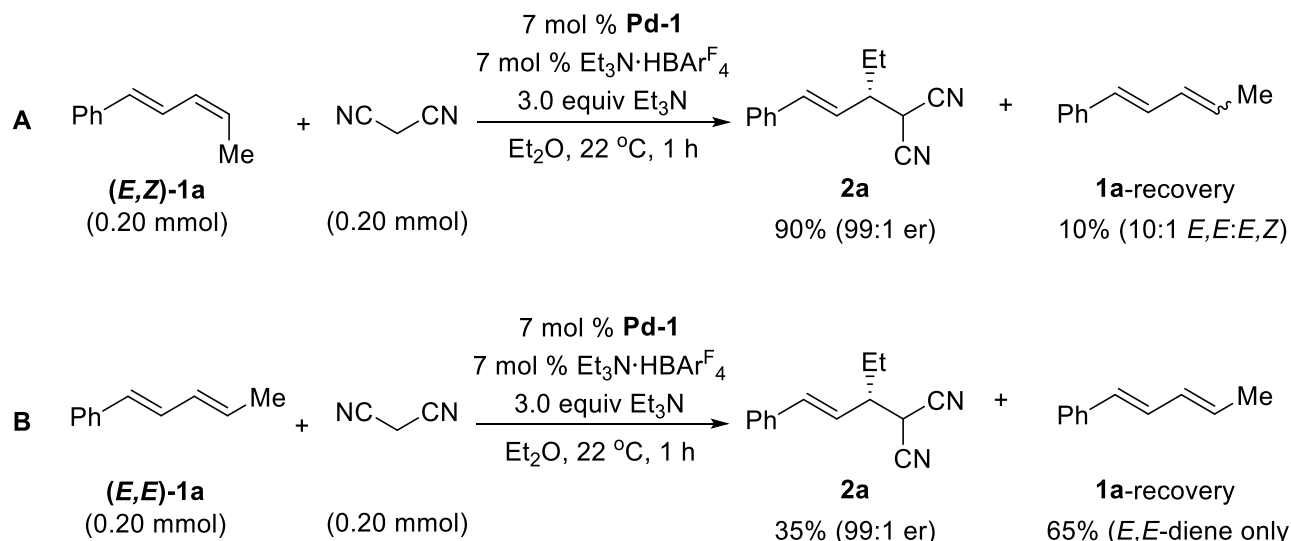

Reactions were carried as described in The General Method but with 0.20 mmol (1.0 equiv) **1a** at 22 °C for 1 h. Products **2a** and **1a-recovery** were then purified by flash silica gel chromatography (100% hexanes to 80:20 hexanes:EtOAc).

**HPLC:** Column: Lux amylose-2 (3 μm, 4.60 mm X 250 mm). Mobile phase: 90:10 *i*-PrOH: Hexanes, 1.0 mL/min. Detection wavelength: 254 nm. **A-2e:** Er = 99:1; **B-2e:** Er = 99:1.

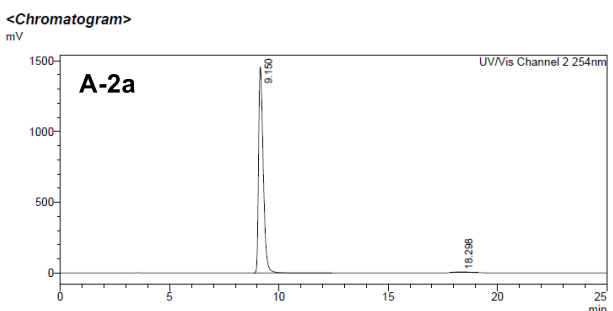

<Peak Table>

| Peak# | Ret. Time | Area     | Area%   |
|-------|-----------|----------|---------|
| 1     | 9.150     | 21519087 | 98.926  |
| 2     | 18.298    | 233553   | 1.074   |
| Total |           | 21752640 | 100.000 |

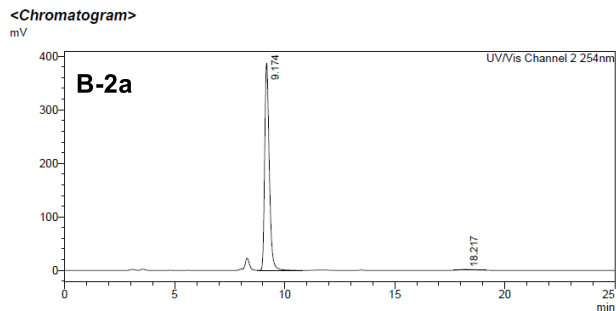

<Peak Table>

| Peak# | Ret. Time | Area    | Area%   |
|-------|-----------|---------|---------|
| 1     | 9.174     | 5610376 | 98.870  |
| 2     | 18.217    | 64095   | 1.130   |
| Total |           | 5674471 | 100.000 |

## VIII. Deuterium Labelling Studies

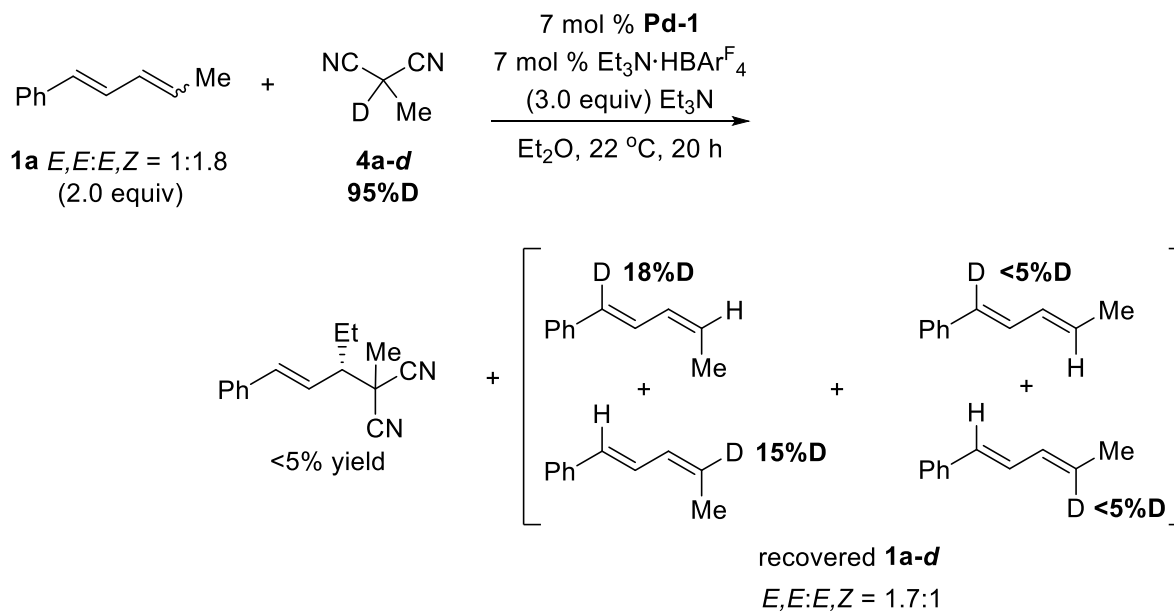

D-Methylmalononitrile was prepared by a known method.<sup>12</sup> Reactions were carried as described in The General Method at 22 °C. Recovered **1a-d** was then purified by flash silica gel chromatography (100% hexanes to 90:10 hexanes:EtOAc).

## IV. References

- (1) M. Brookhart, B. Grant and F. Volpe, A, *Organometallics* 1992, **11**, 3920–3922.
- (2) S. Park and S. J. Malcolmson, *ACS Catal.* 2018, **8**, 8468–8476.
- (3) N. J. Adamson, E. Hull, and S. J. Malcolmson, *J. Am. Chem. Soc.* 2017, **139**, 7180–7183; N. J. Adamson, K. C. E. Wibur and S. J. Malcolmson, *J. Am. Chem. Soc.* 2018, **140**, 2761–2764.
- (4) D.-Q. Shi and R.-Y. Chen, *Chinese Chemical Letters* 1999, **10**, 911–914.
- (5) M. K. Ghorai, R. Talukdar and D. P. Tiwari, *Org. Lett.* 2014, **16**, 2204–2207; G. Dickmeiss, K. L. Jensen, D. Worgull, P. T. Franke and K. A. Jørgensen, *Angew. Chem., Int. Ed.* 2011, **50**, 1580–1583.
- (6) M. Tiecco, L. Testaferri, M. Tingoli and D. Bartoli, *Tetrahedron* 1989, **45**, 6819–6832; A. Llevot, B. Monney, A. Sehlinger, S. Behrens and M. A. R. Meier, *Chem. Commun.* 2017, **53**, 5175–5178; X. Zhang, X. Jia, L. Fang, N. Liu, J. Wang and X. Fan, *Org. Lett.* 2011, **13**, 5024–5027.
- (7) Y. Wang, Y.-N. Xu, G.-S. Fang, H.-J. Kang, Y. Gu and S.-K. Tian, *Org. Biomol. Chem.* 2015, **13**, 5367–5371.
- (8) D. Laurenti, M. Feuerstein, G. Pèpe, H. Doucet, and M. Santelli, *J. Org. Chem.* 2001, **66**, 1633–1637.
- (9) K. Balaraman, R. Vasanthan and V. Kesavan, *Tetrahedron* 2013, **69**, 6162–6169.
- (10) S. Förster, O. Tverskoy, G. Helmchen, *Synlett* 2008, 2803–2806.
- (11) J. Li, M. J. Lear and Y. Hayashi, *Angew. Chem. Int. Ed.* 2016, **55**, 9060–9064.
- (12) B. H. Oh, I. Nakamura and Y. Yamamoto, *Tetrahedron Lett.* 2002, **43**, 9625–9628.

## X. NMR Spectra

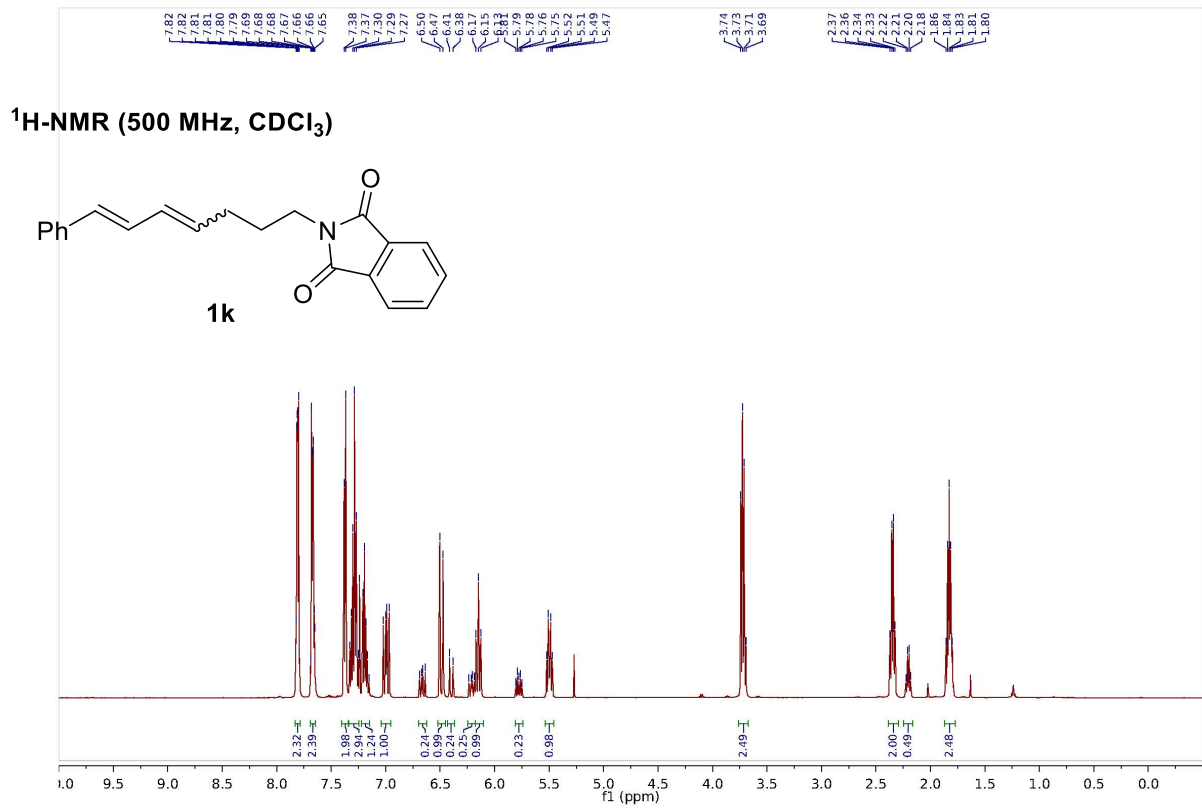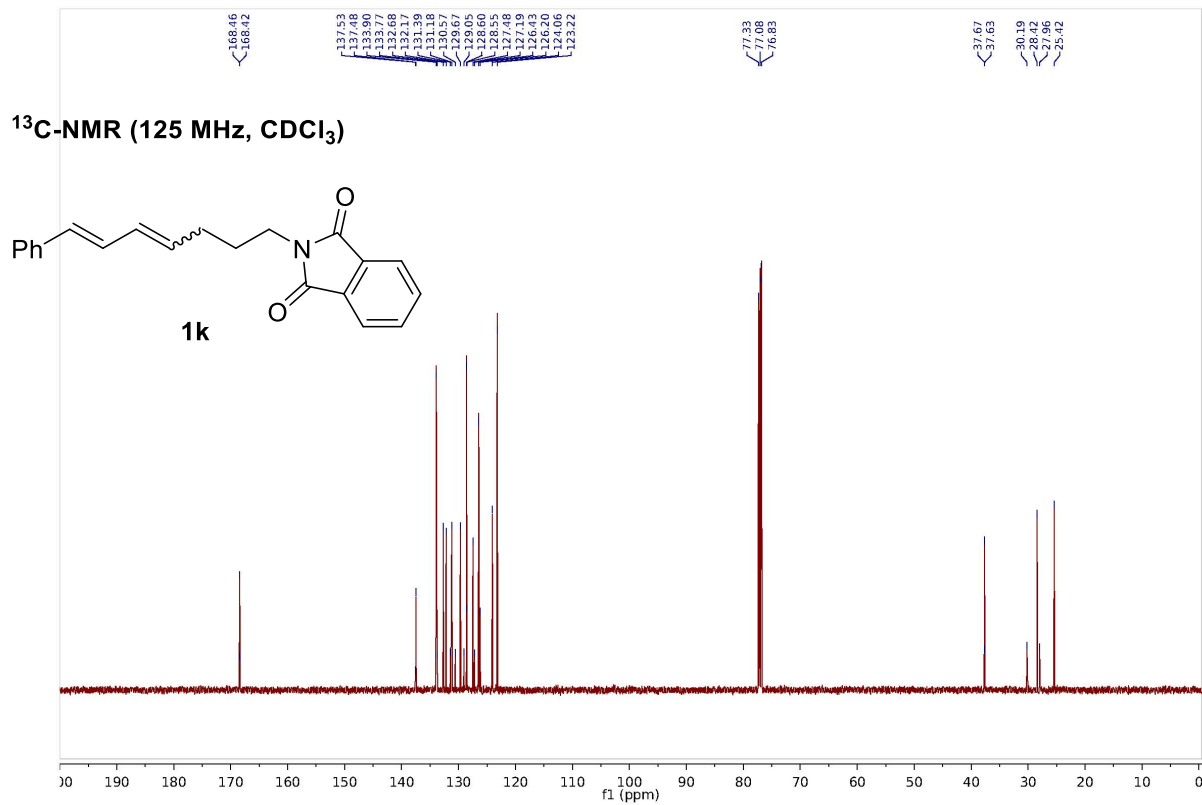



**<sup>1</sup>H-NMR (400 MHz, CDCl<sub>3</sub>)**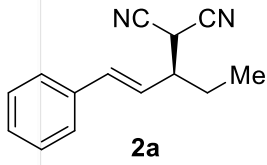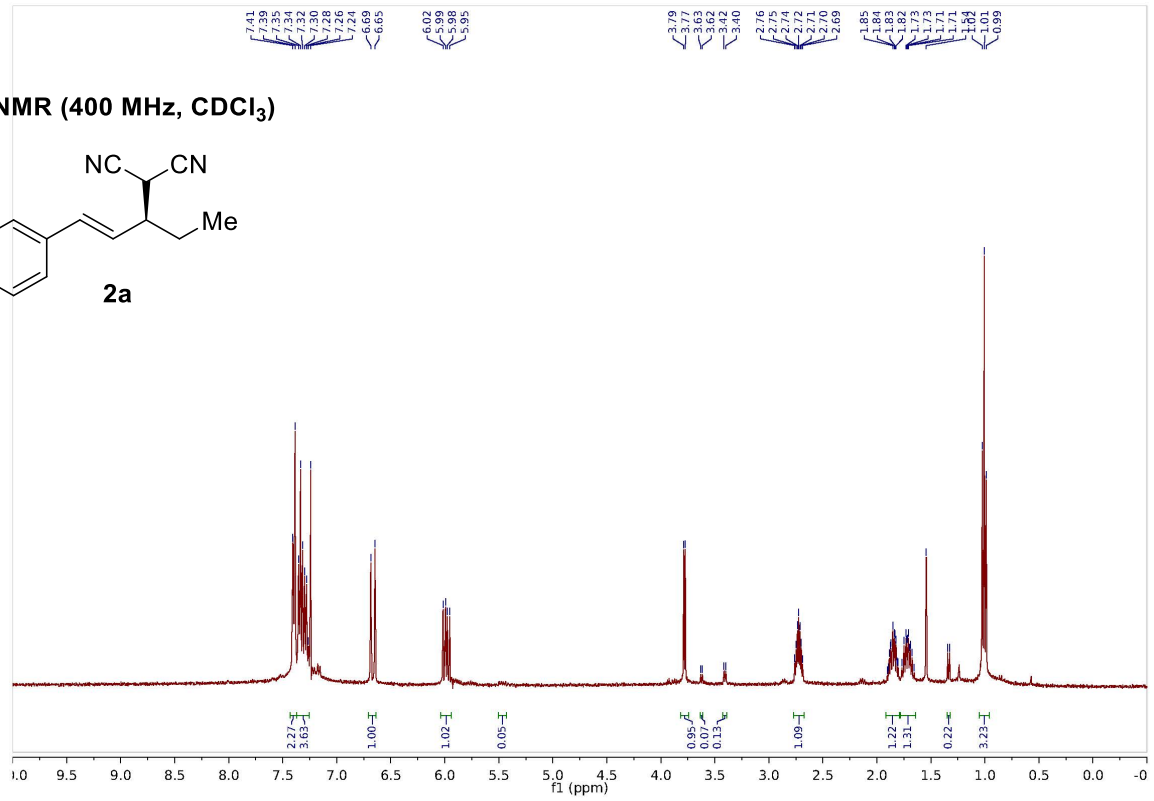**<sup>13</sup>C-NMR (125 MHz, CDCl<sub>3</sub>)**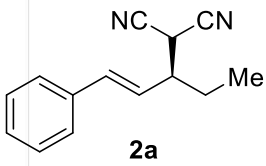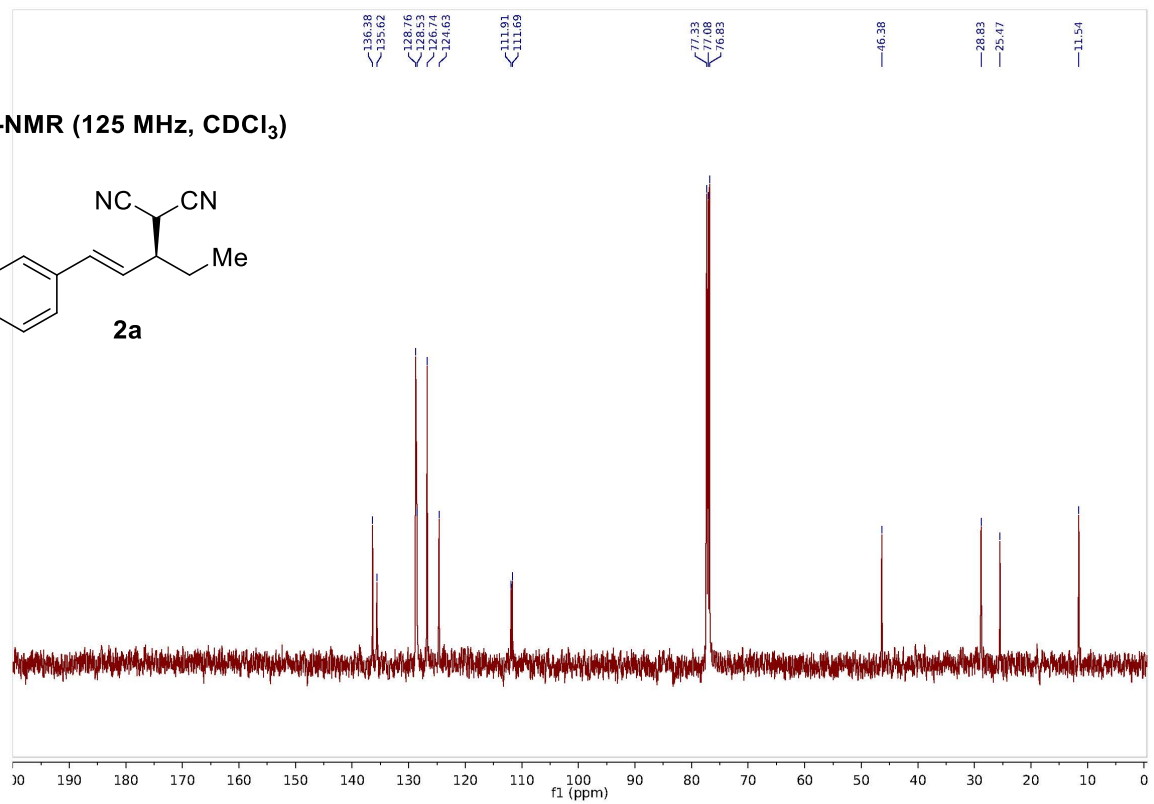

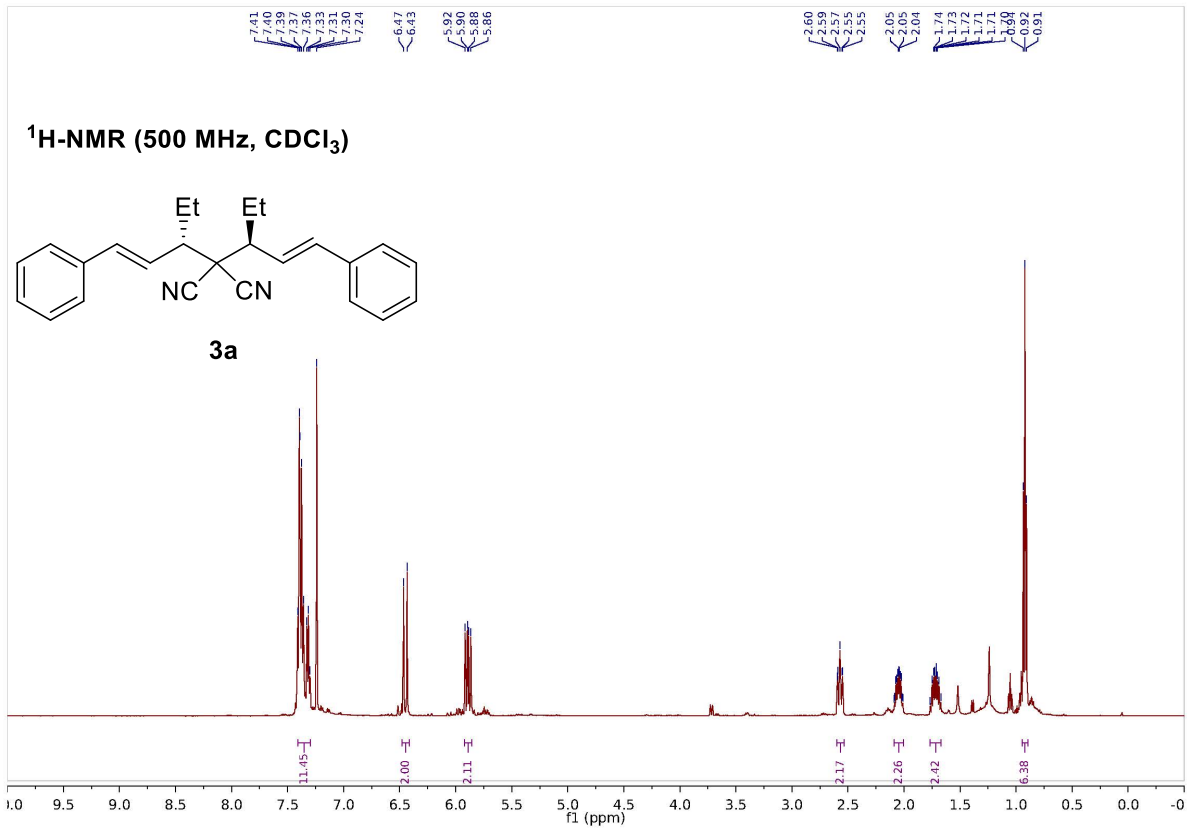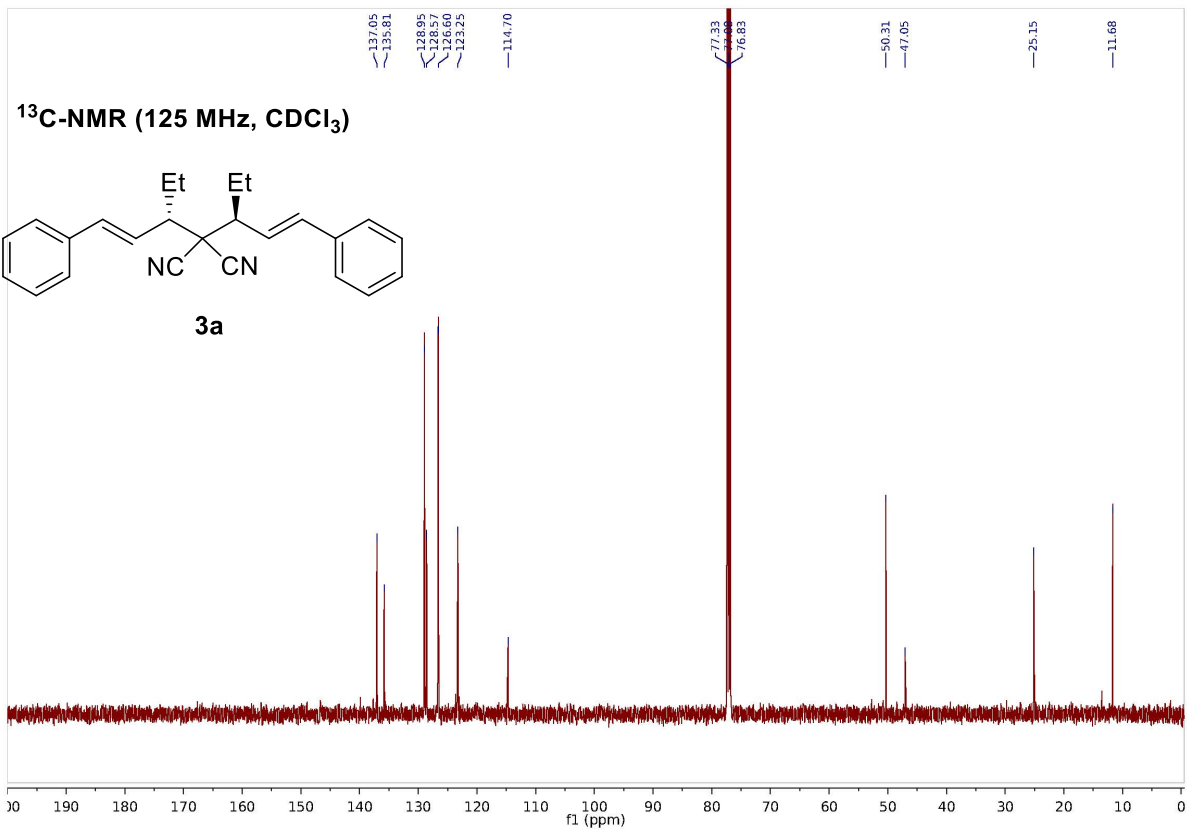

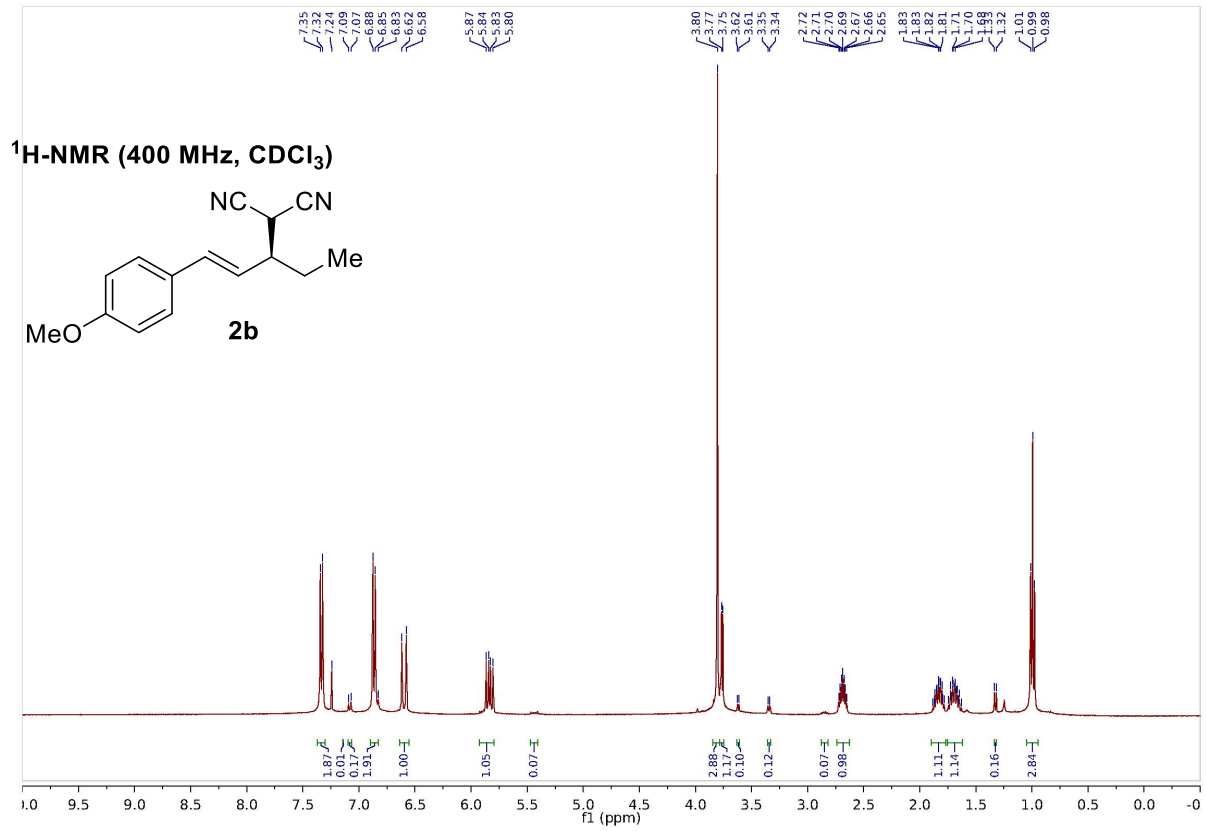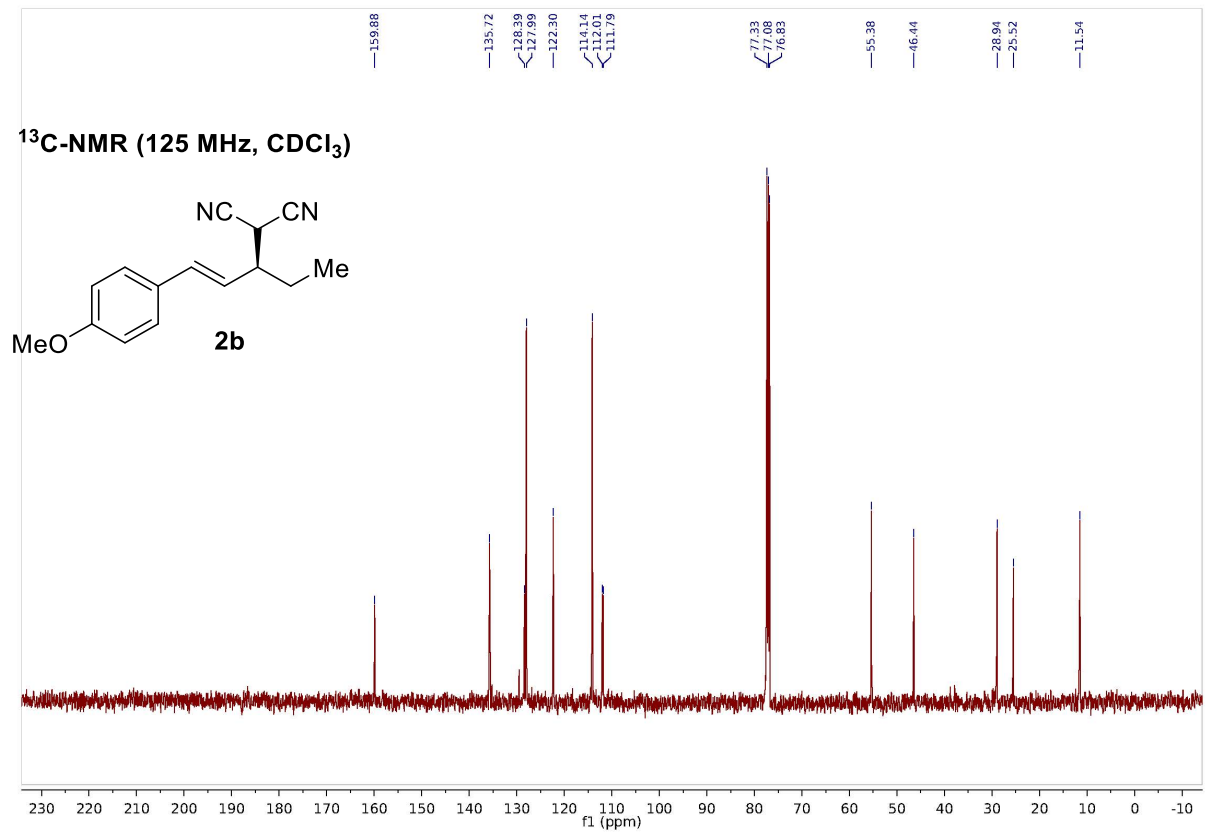

**<sup>1</sup>H-NMR (400 MHz, CDCl<sub>3</sub>)**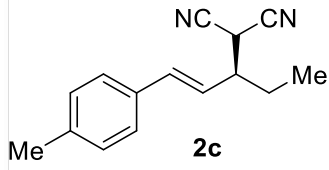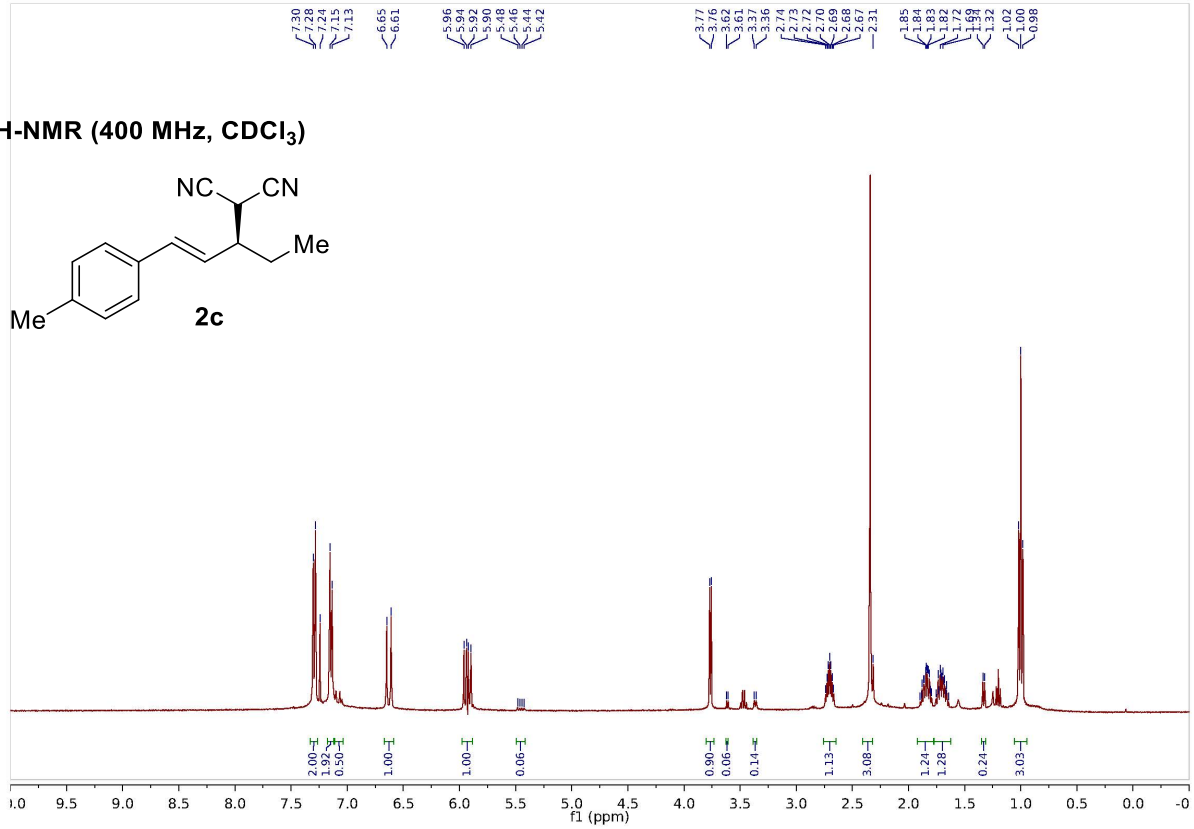**<sup>13</sup>C-NMR (125 MHz, CDCl<sub>3</sub>)**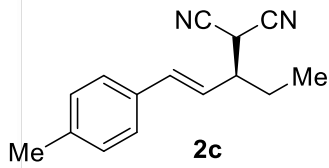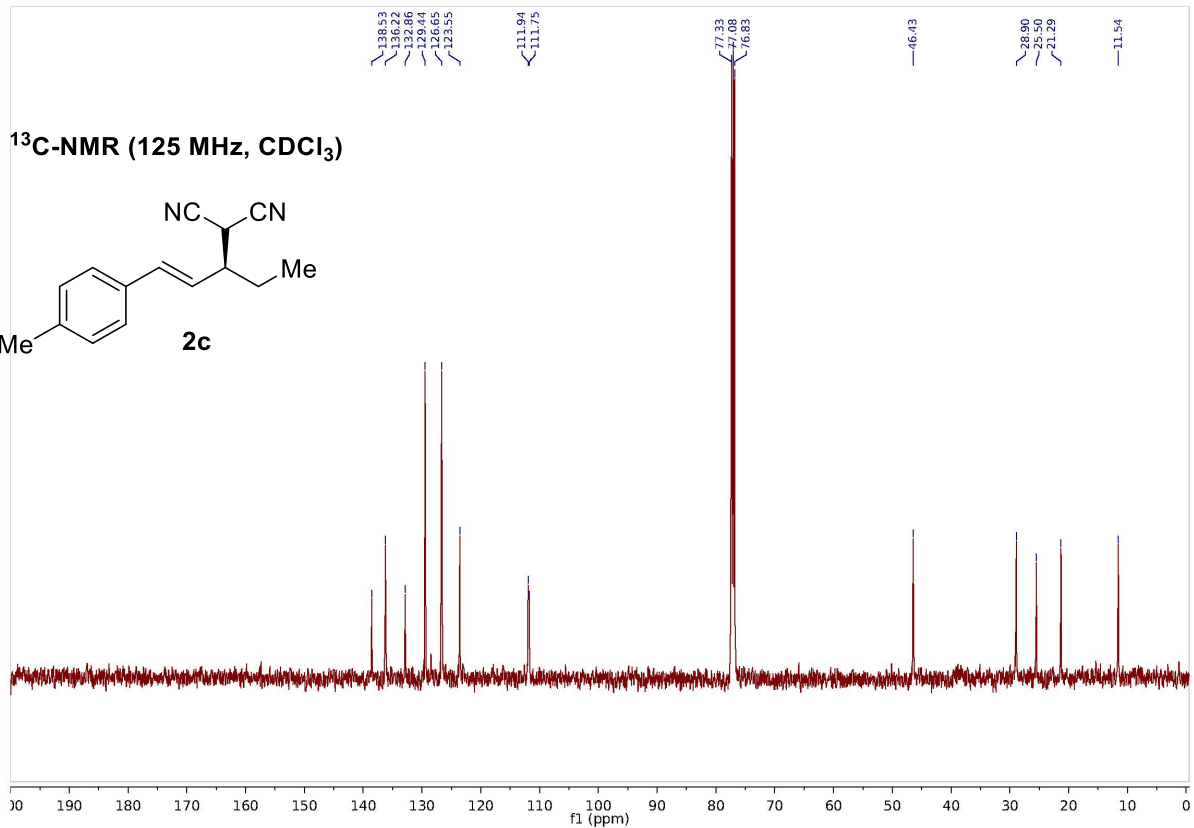

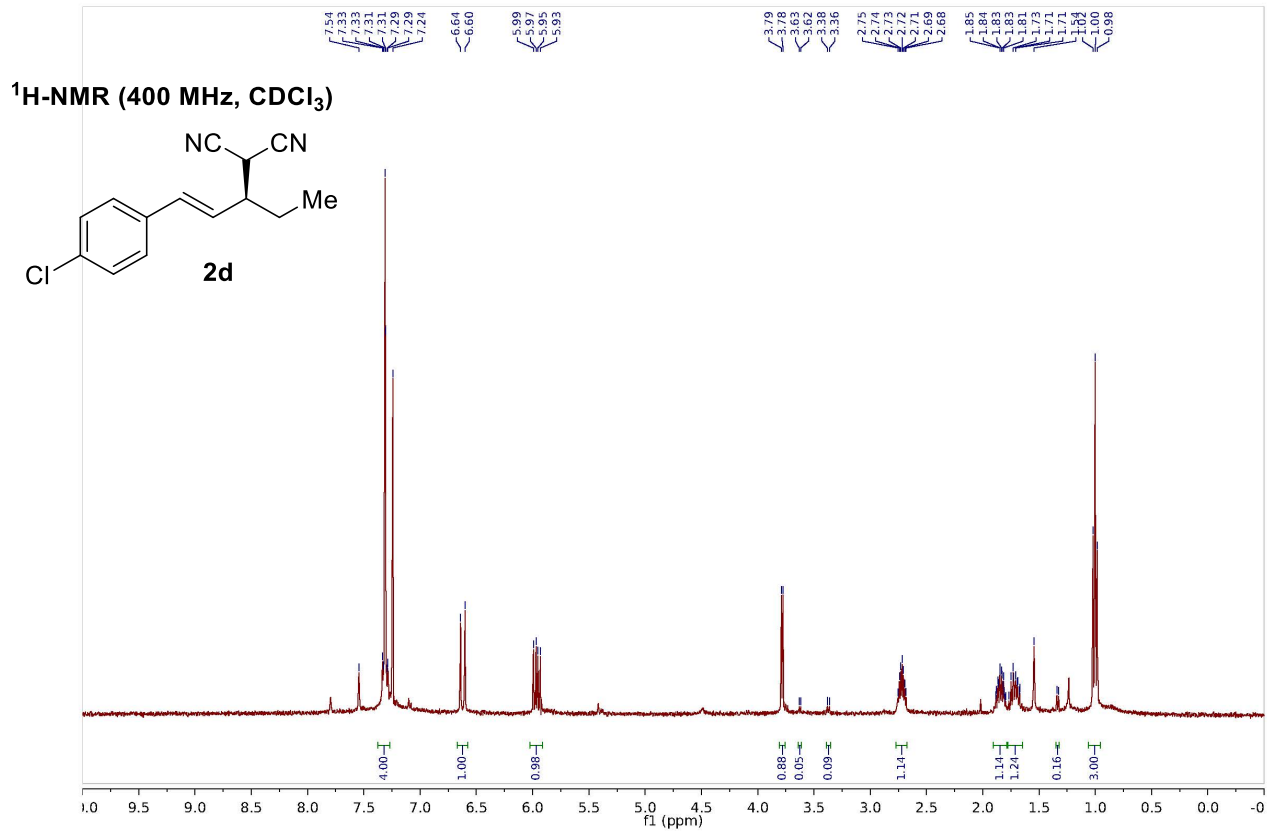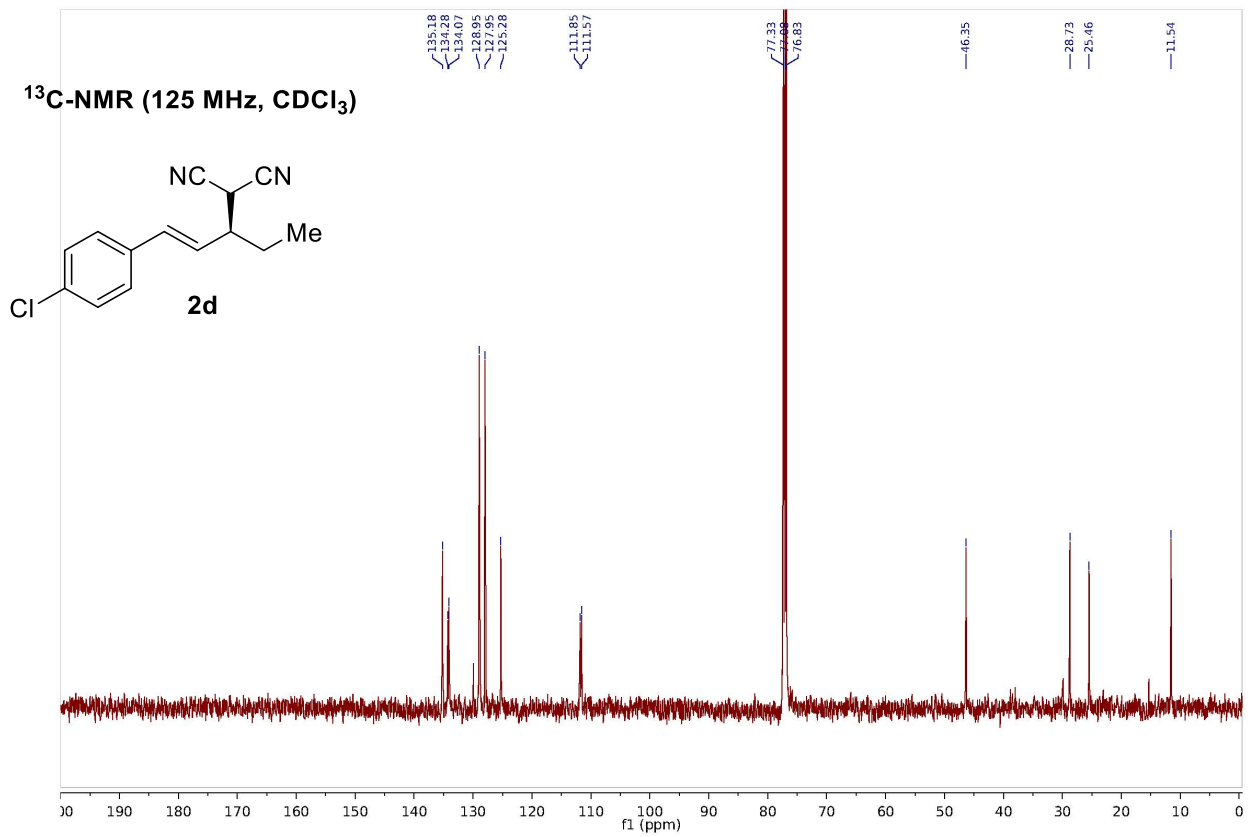

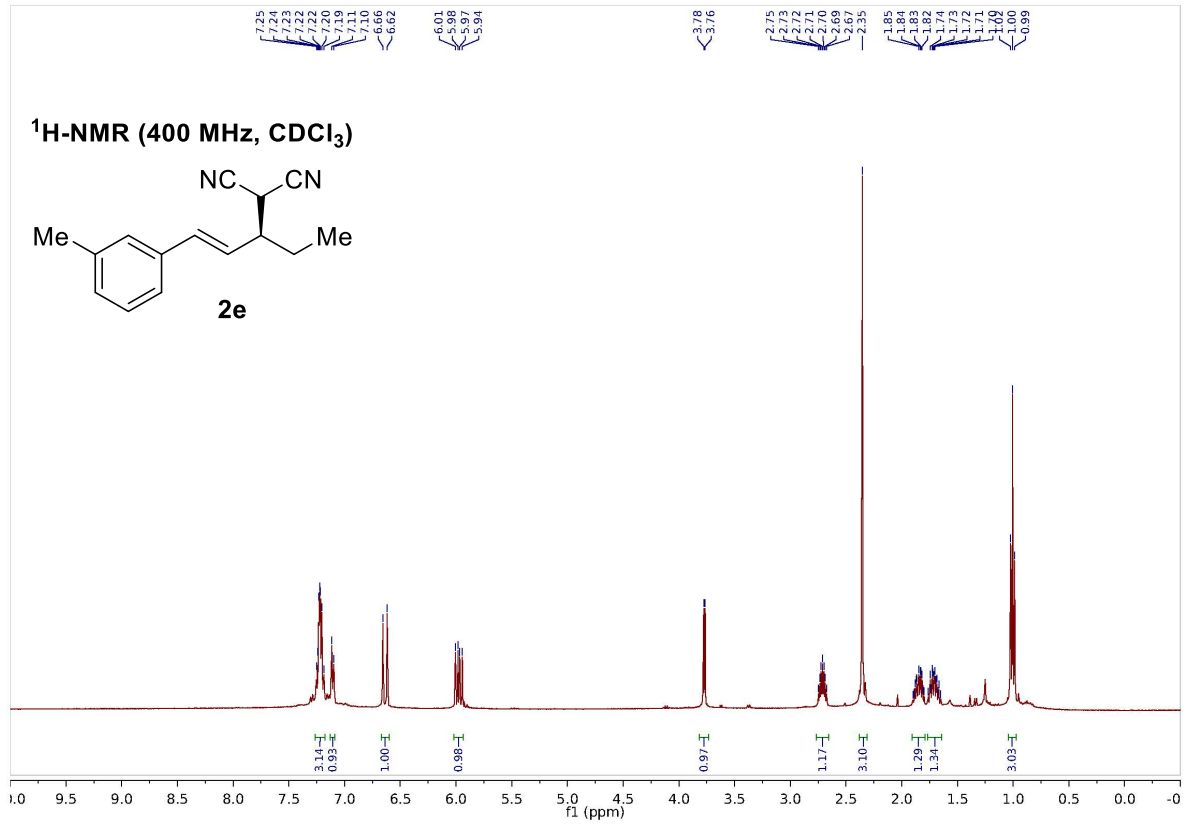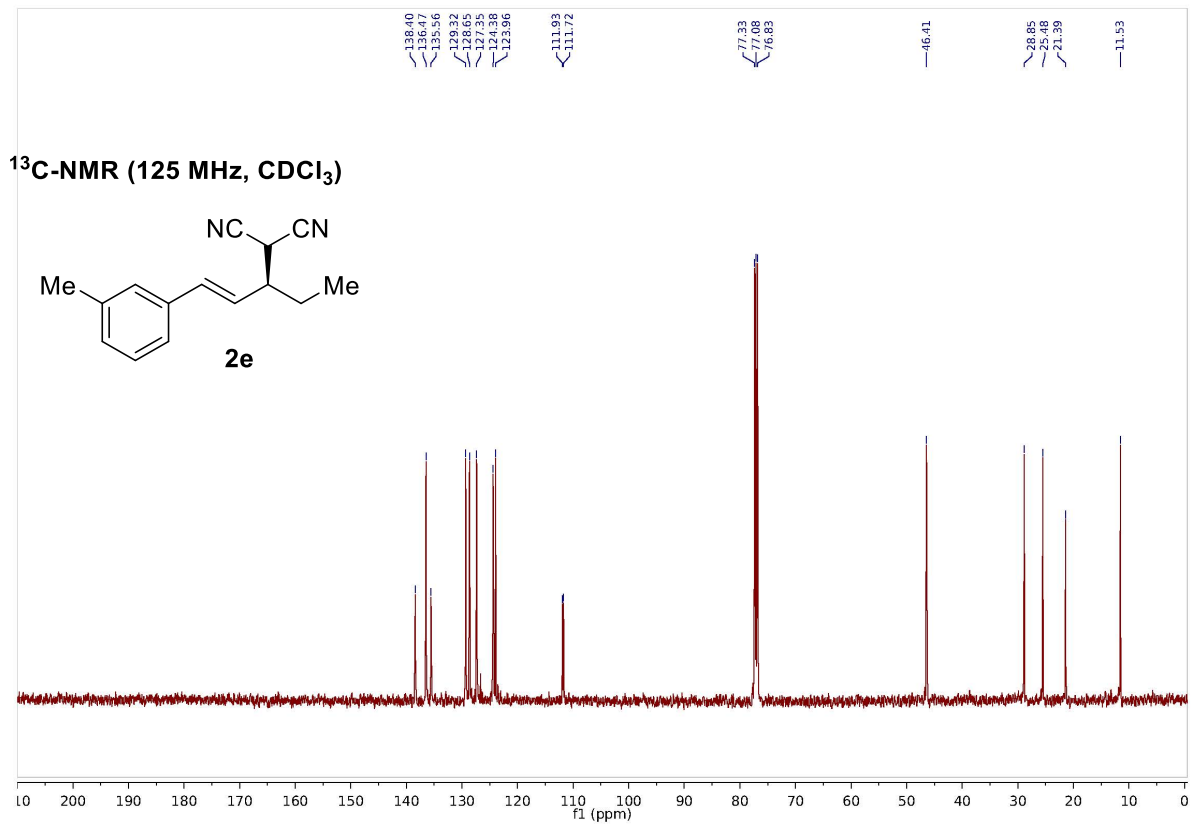

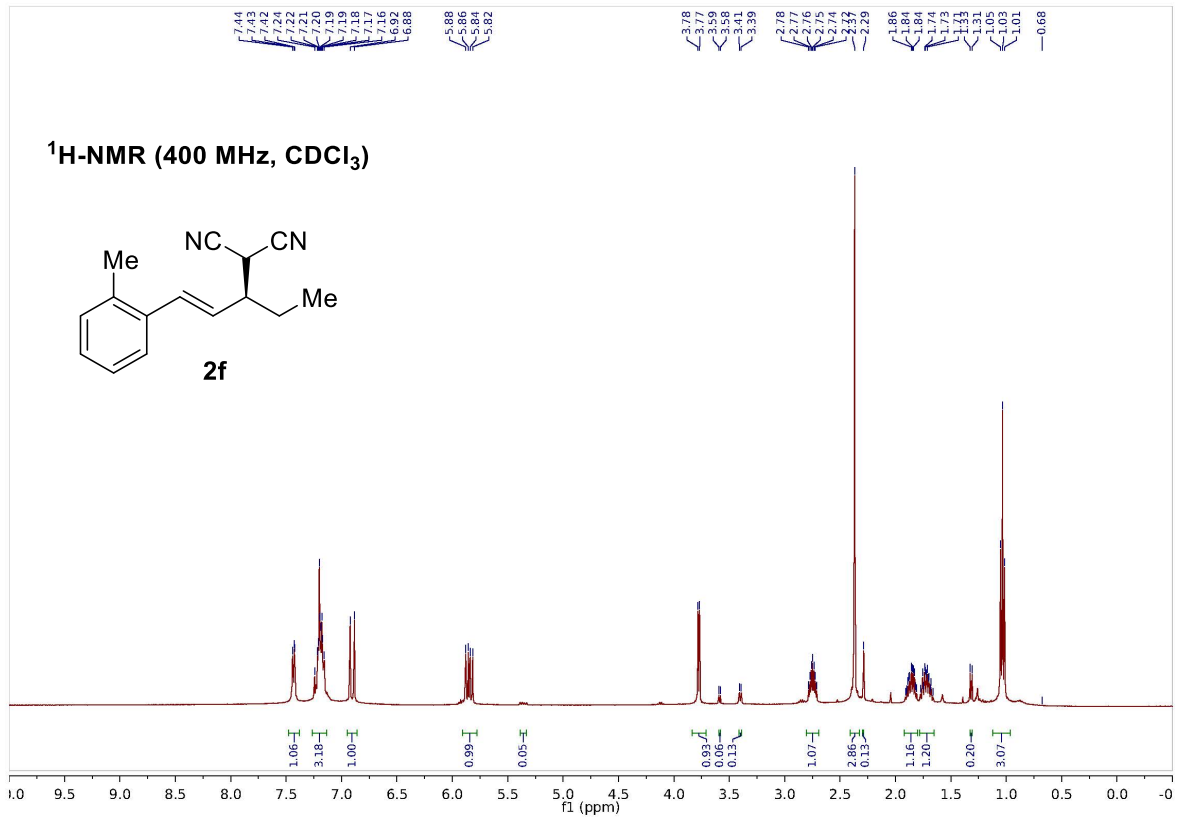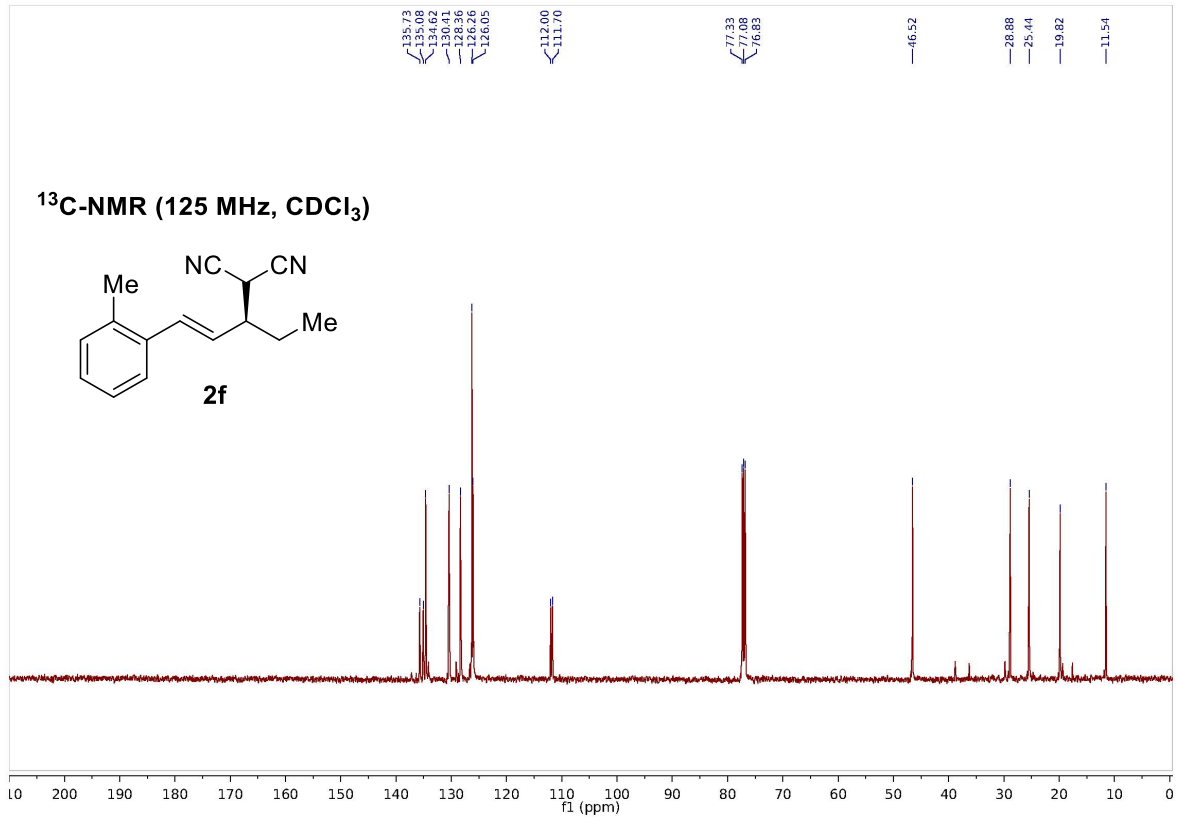

**<sup>1</sup>H-NMR (400 MHz, CDCl<sub>3</sub>)**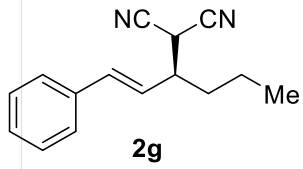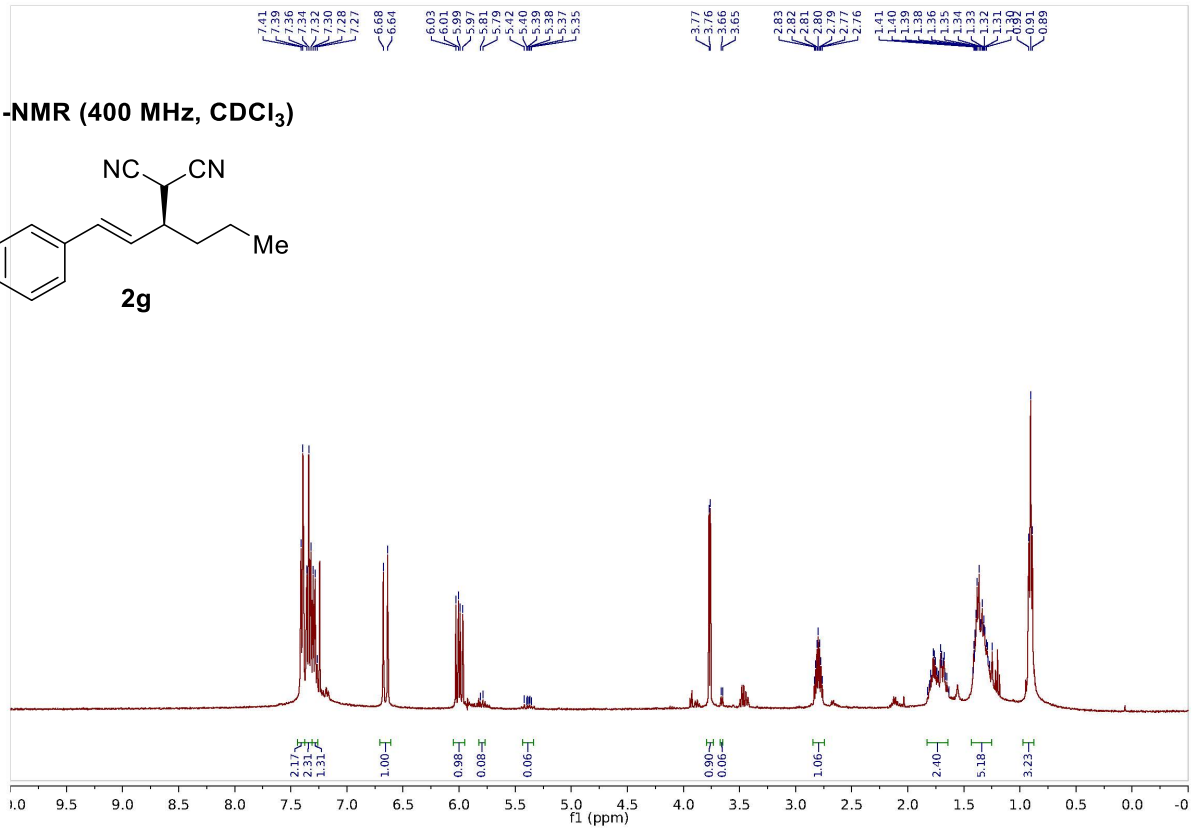**<sup>13</sup>C-NMR (125 MHz, CDCl<sub>3</sub>)**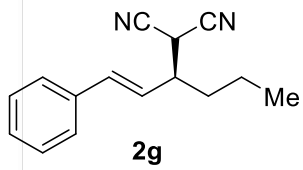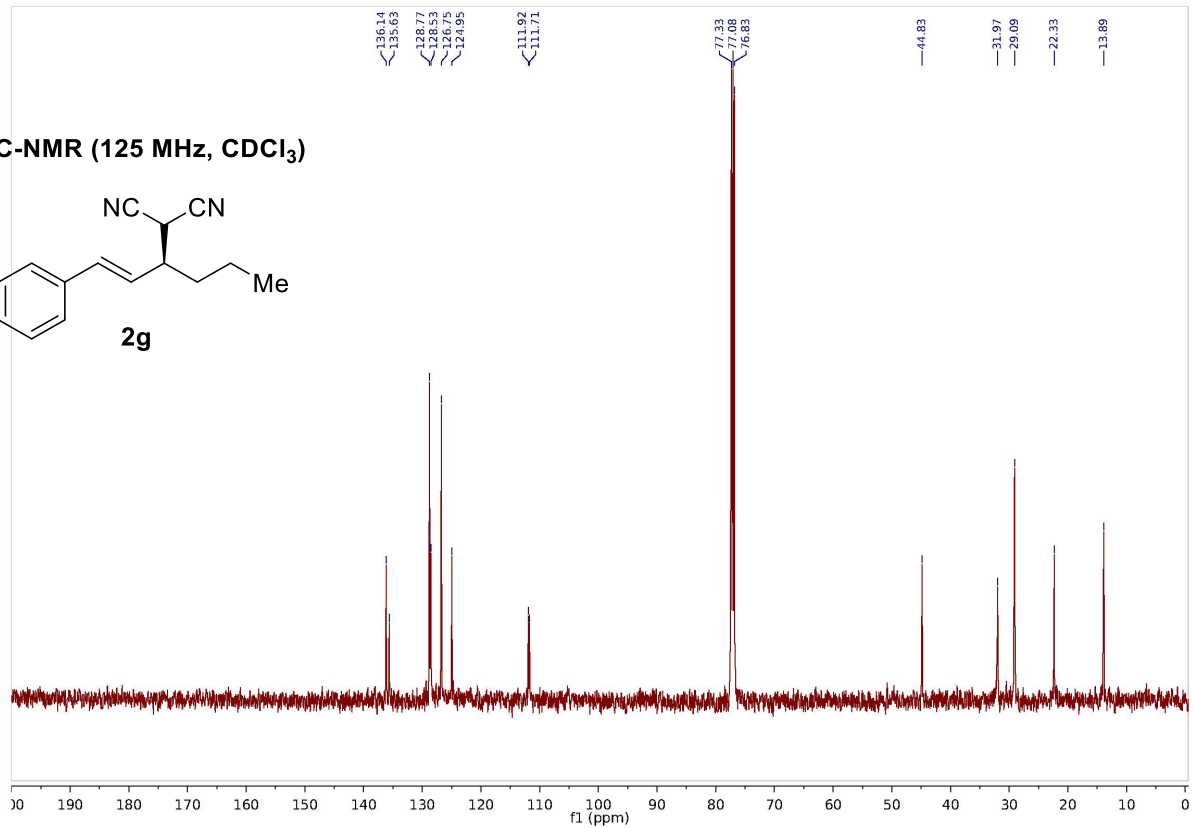



**<sup>1</sup>H-NMR (500 MHz, CDCl<sub>3</sub>)**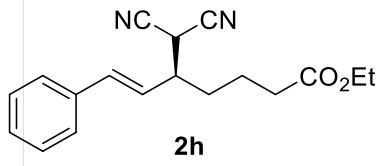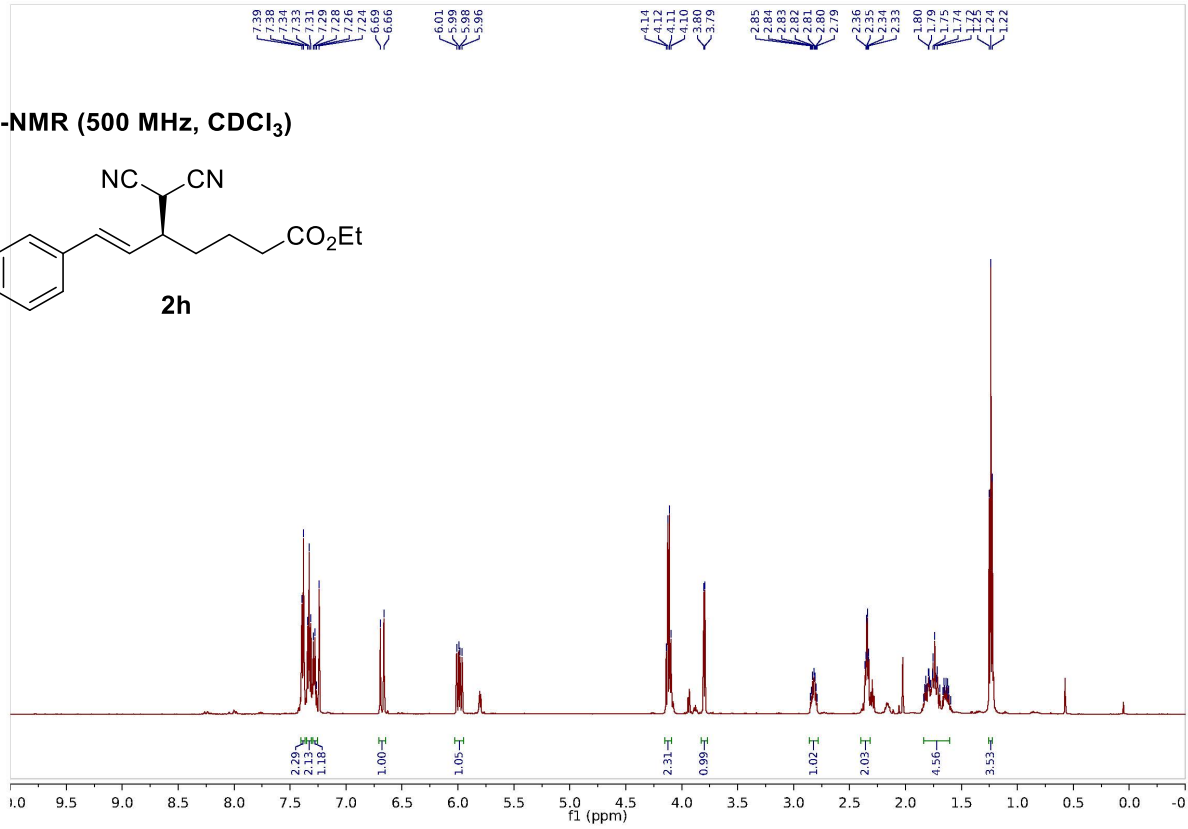**<sup>13</sup>C-NMR (125 MHz, CDCl<sub>3</sub>)**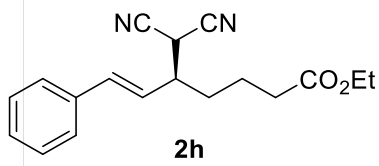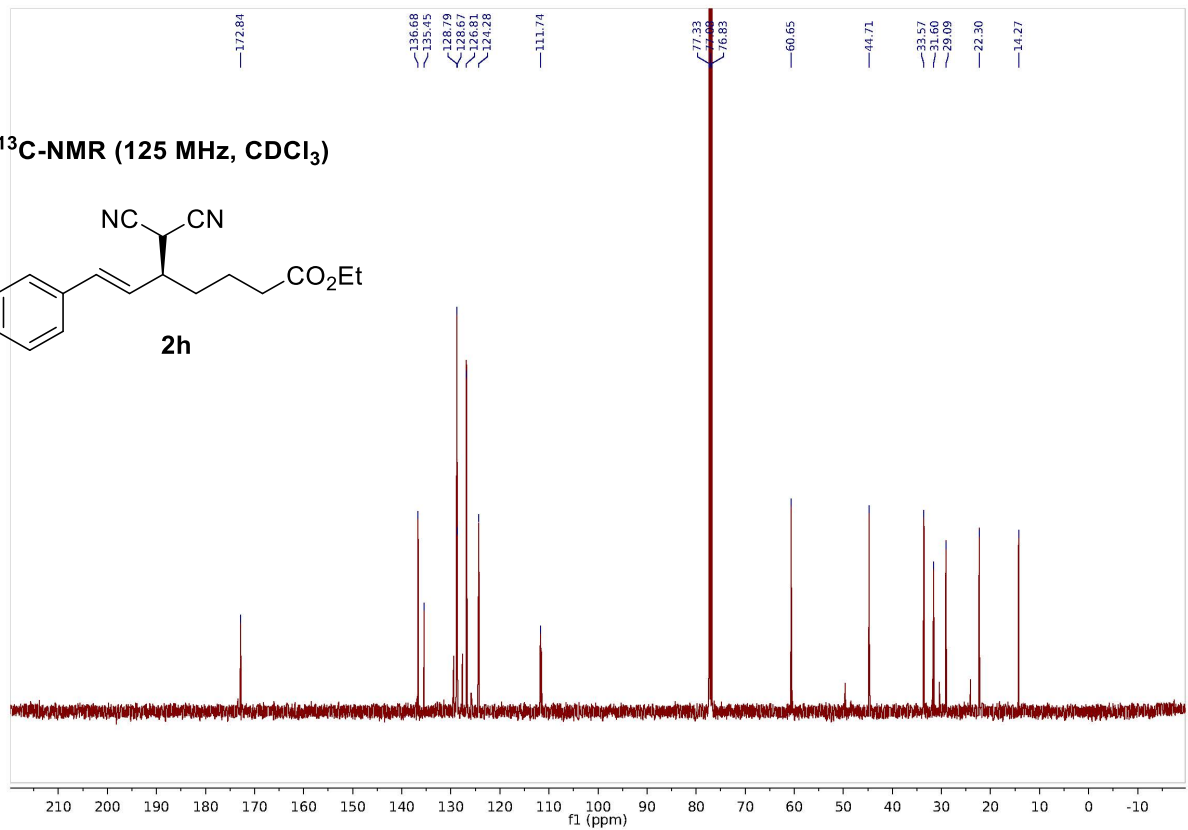

**<sup>1</sup>H-NMR (500 MHz, CDCl<sub>3</sub>)**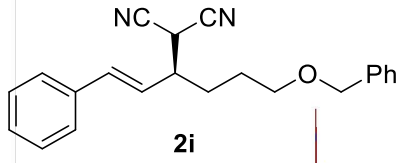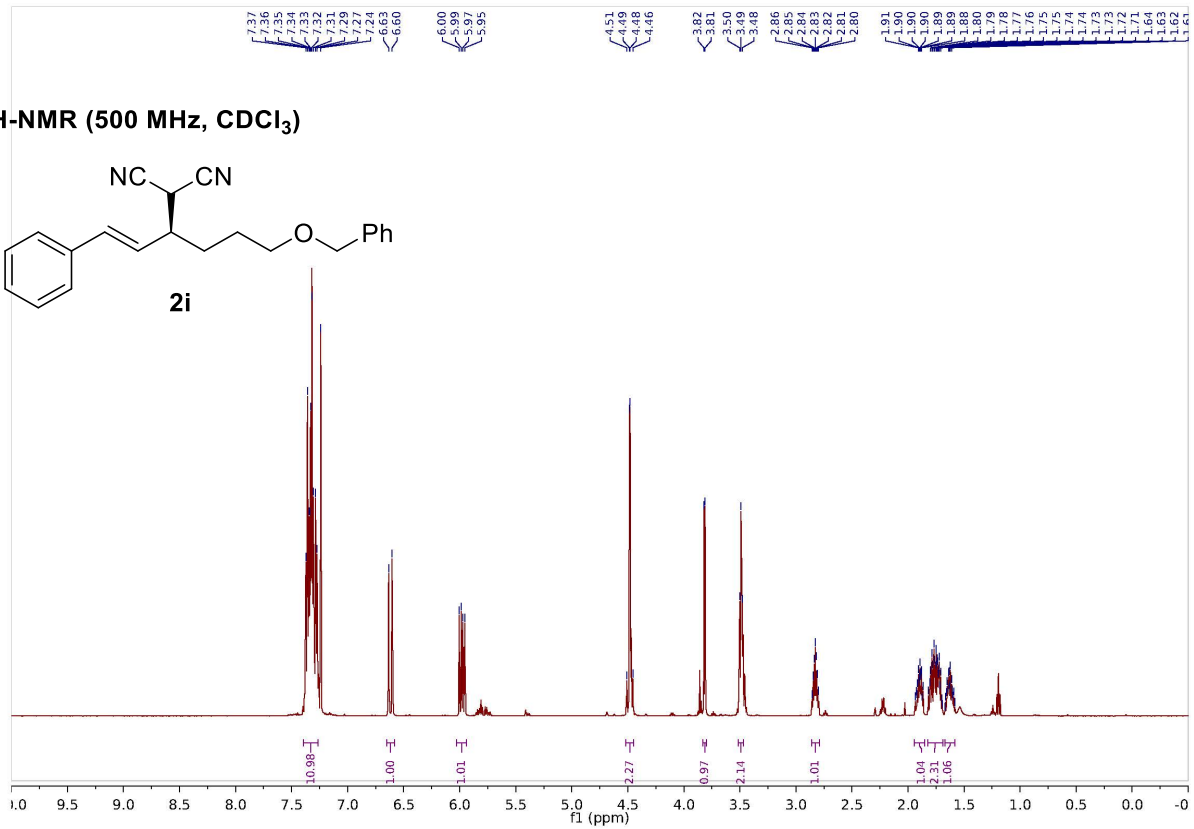**<sup>13</sup>C-NMR (125 MHz, CDCl<sub>3</sub>)**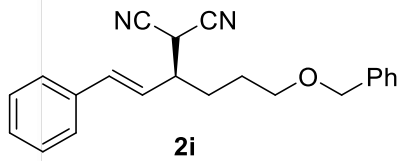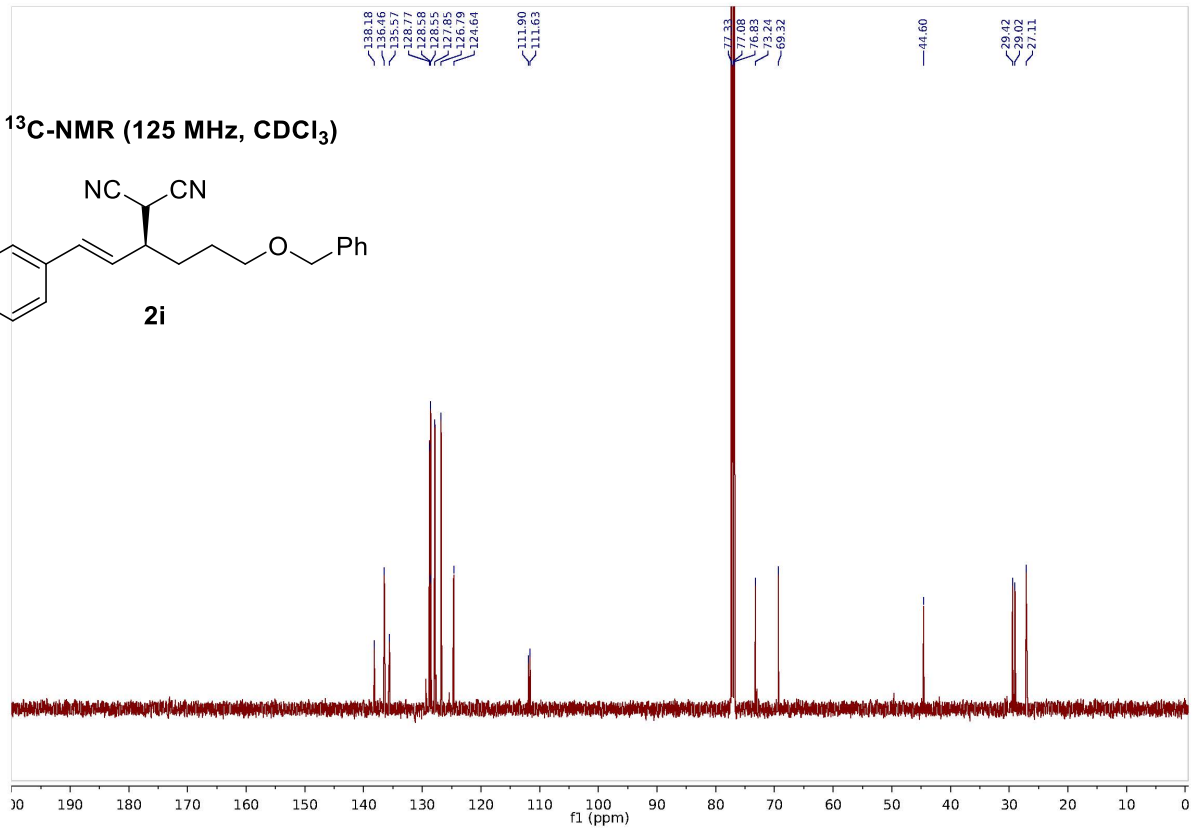

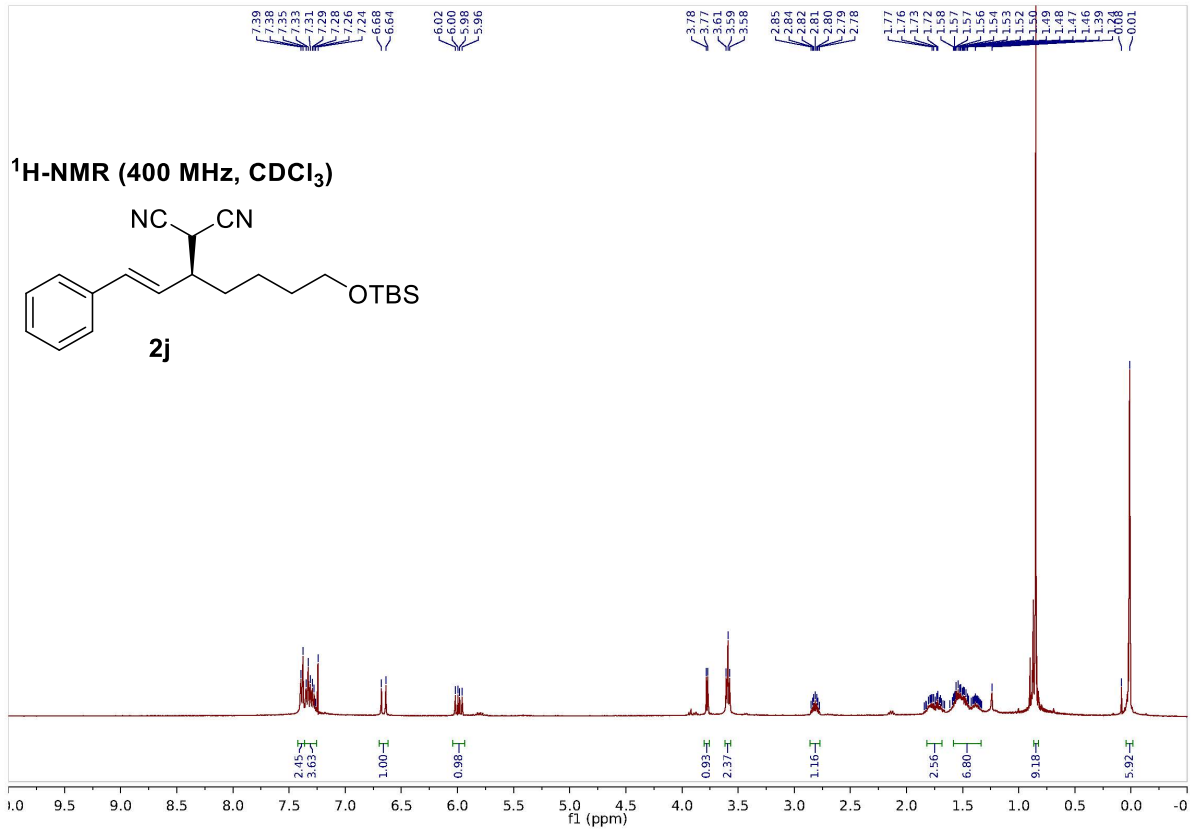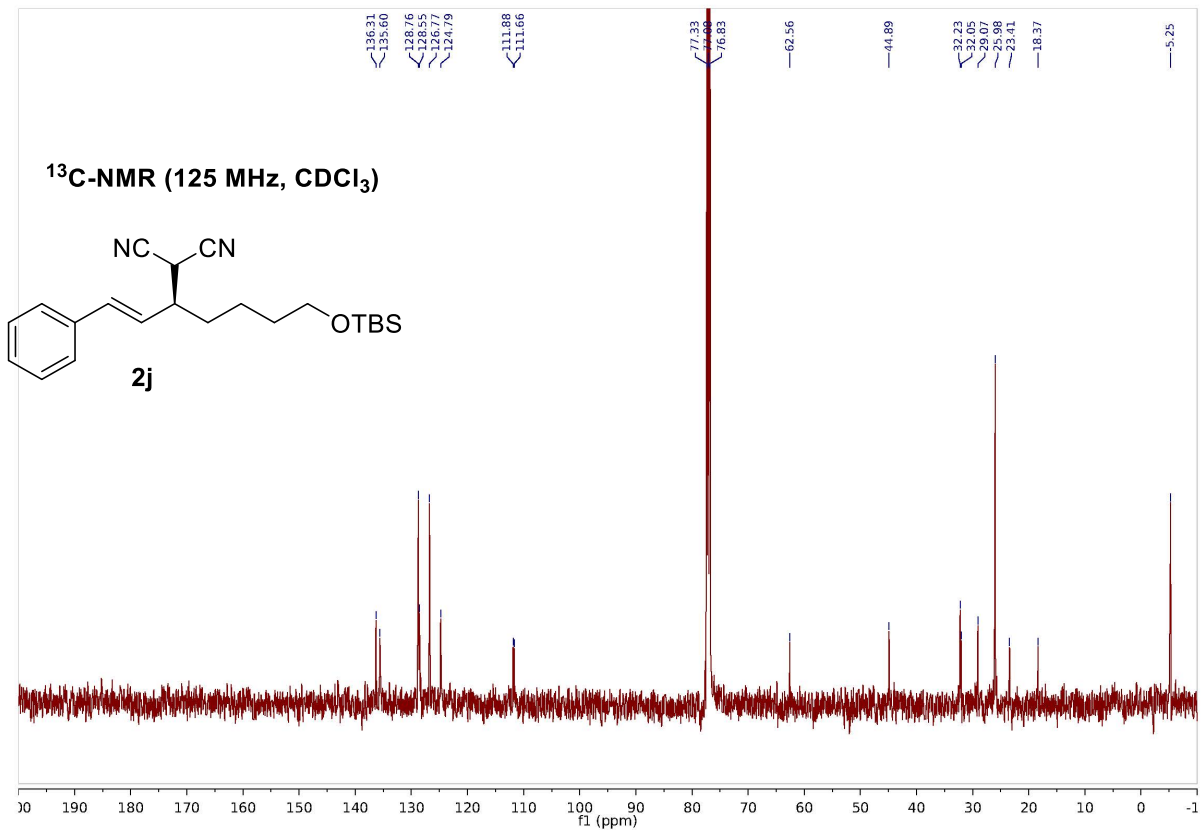

**<sup>1</sup>H-NMR (400 MHz, CDCl<sub>3</sub>)**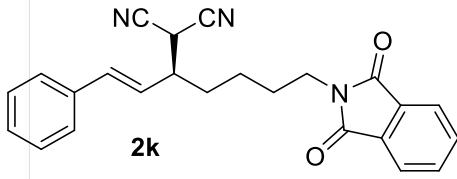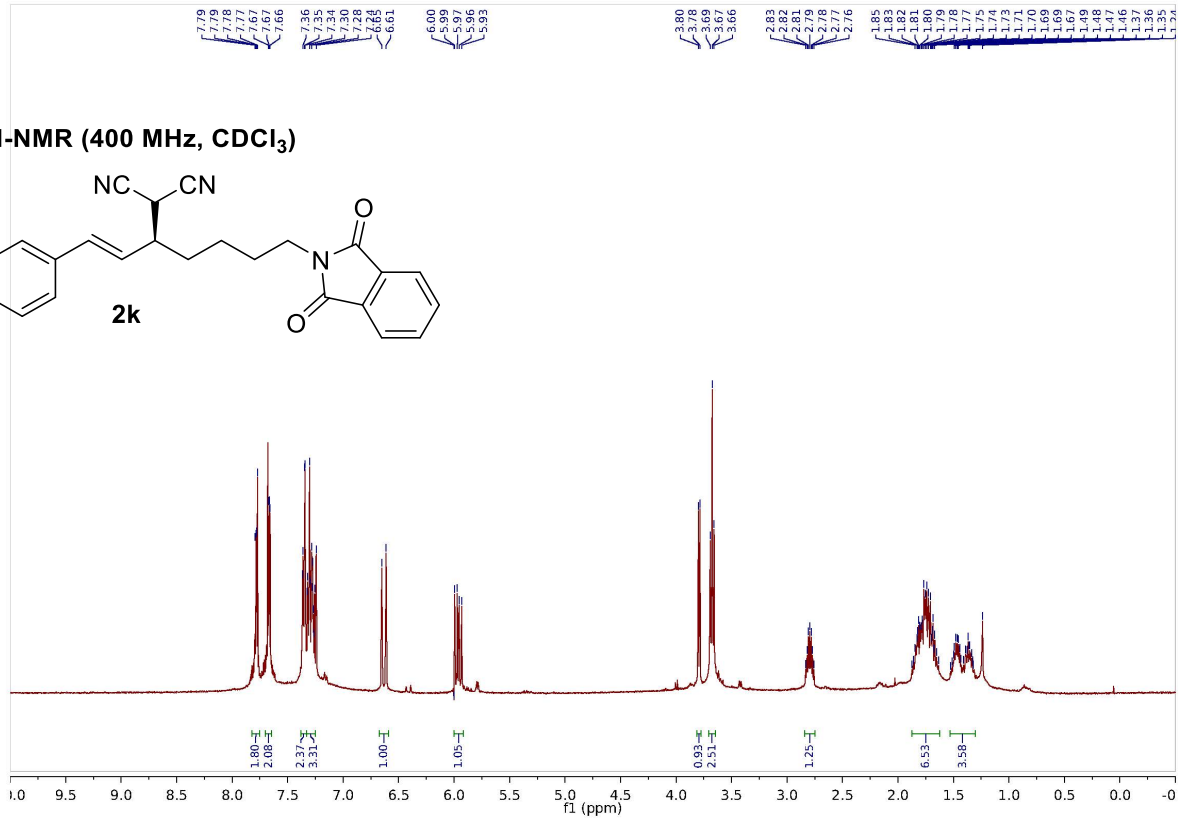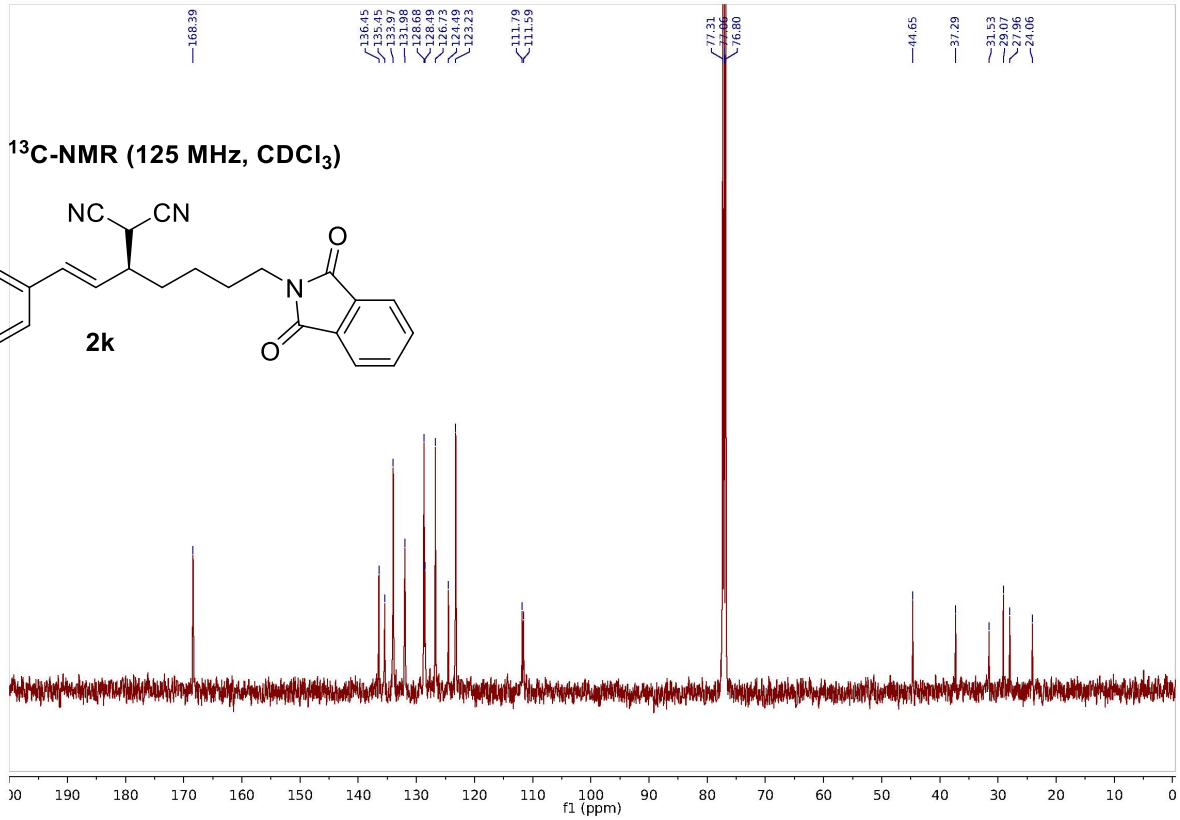

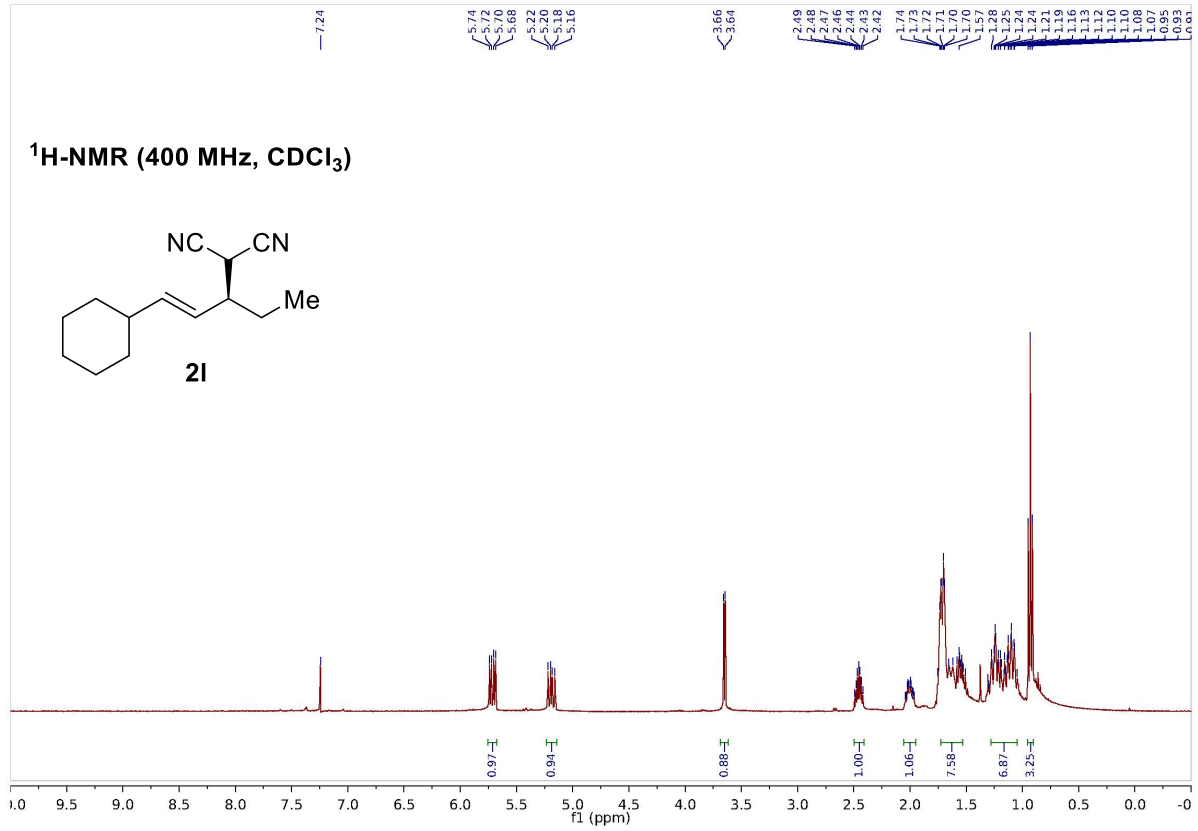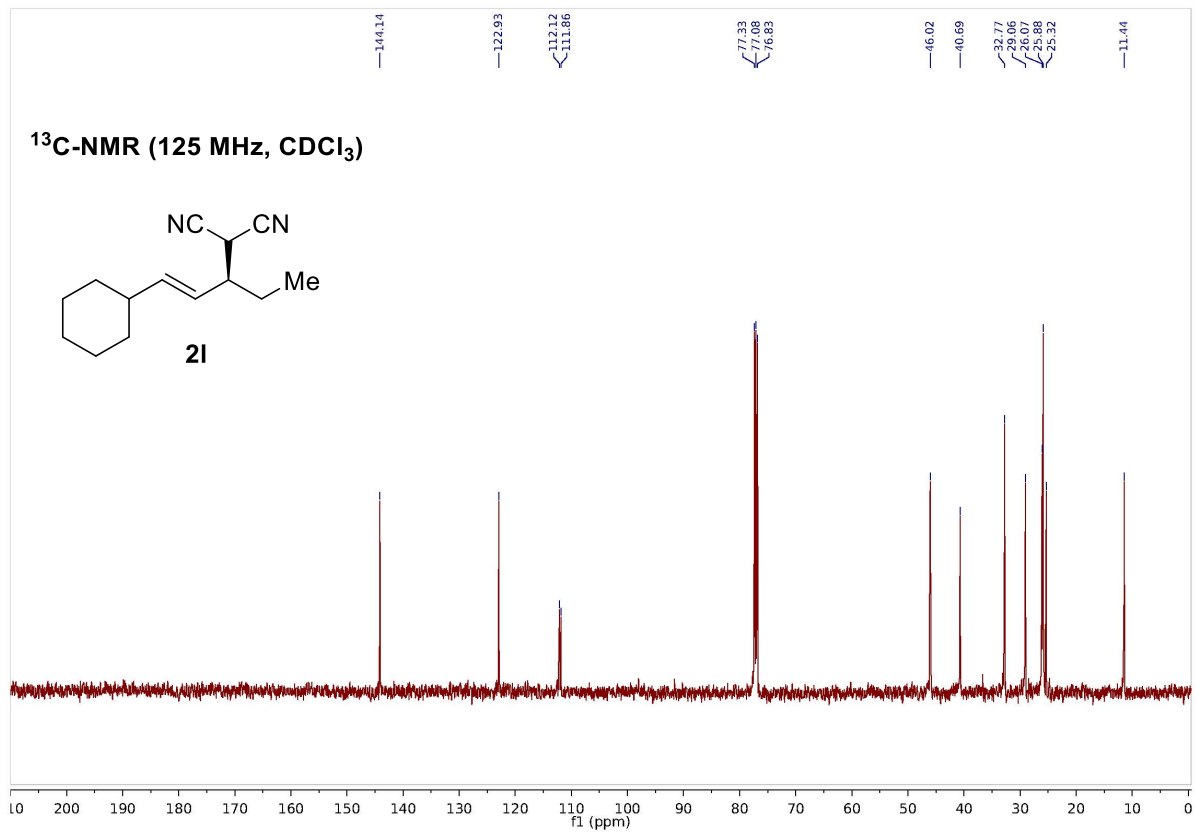

**<sup>1</sup>H-NMR (500 MHz, CDCl<sub>3</sub>)**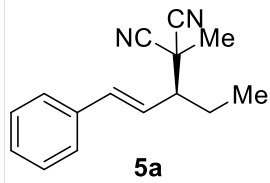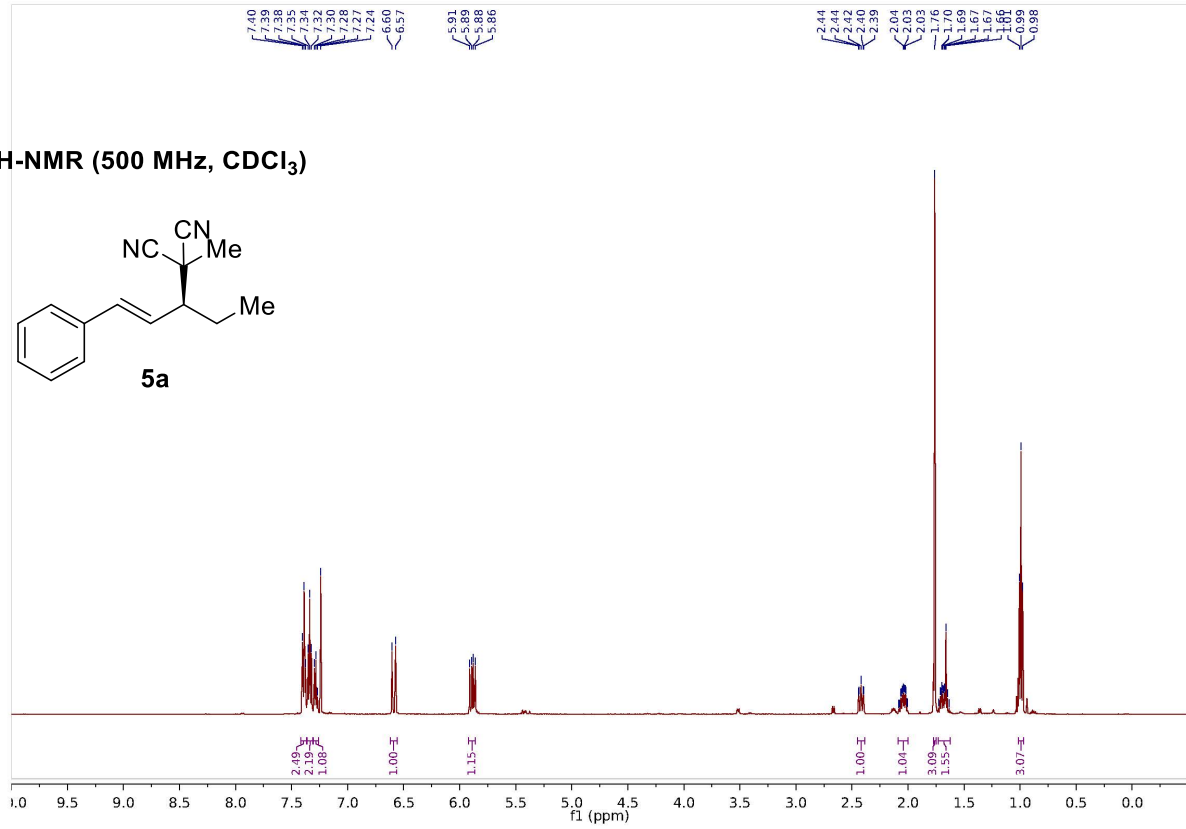**<sup>13</sup>C-NMR (125 MHz, CDCl<sub>3</sub>)**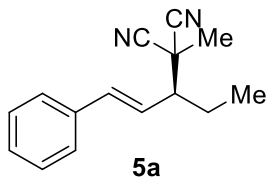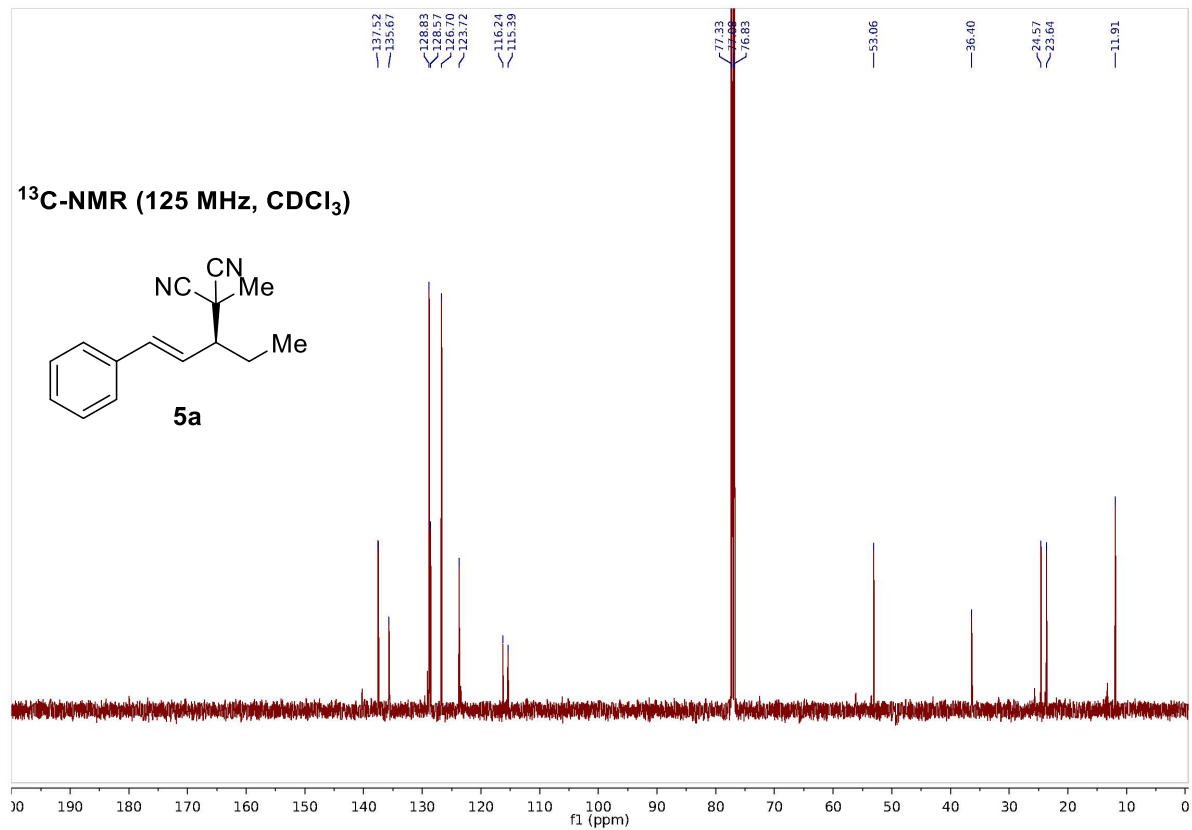

**<sup>1</sup>H-NMR (400 MHz, CDCl<sub>3</sub>)**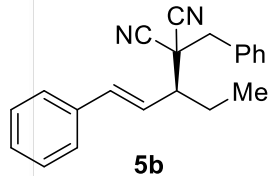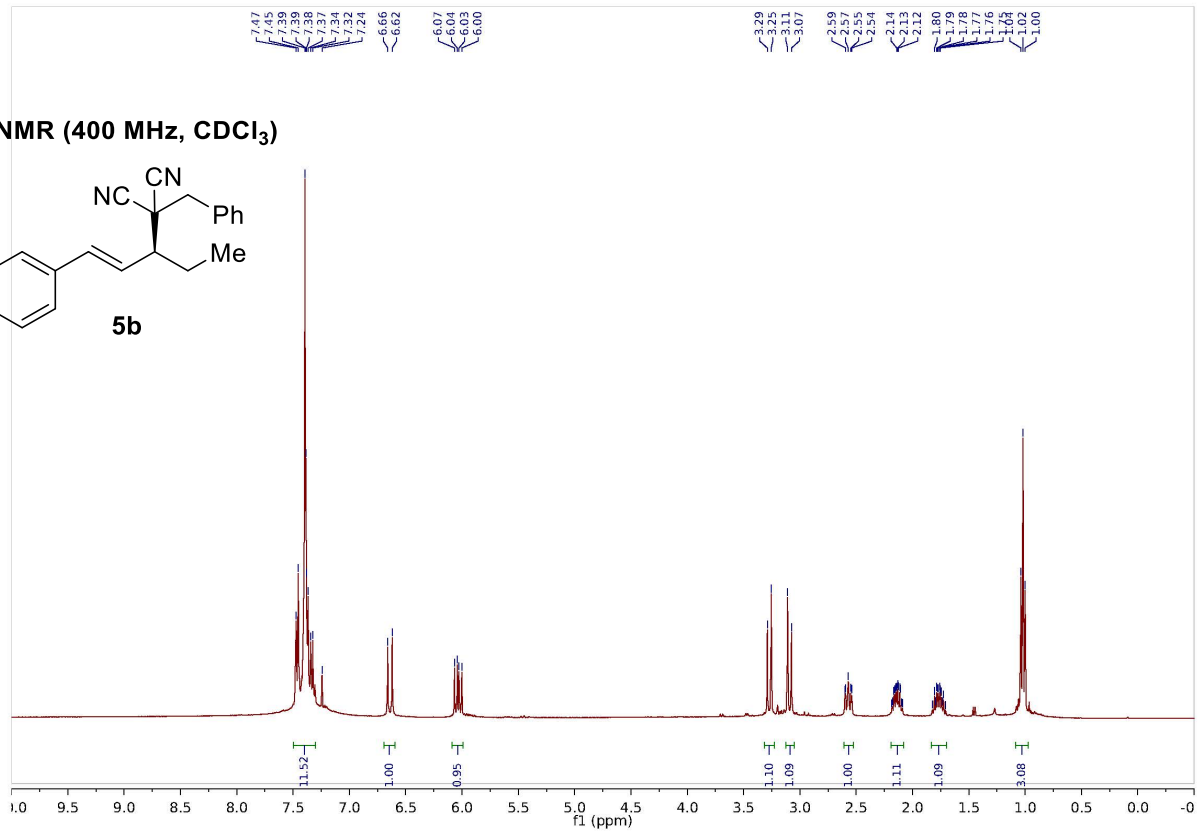**<sup>13</sup>C-NMR (125 MHz, CDCl<sub>3</sub>)**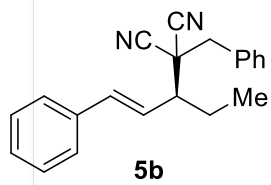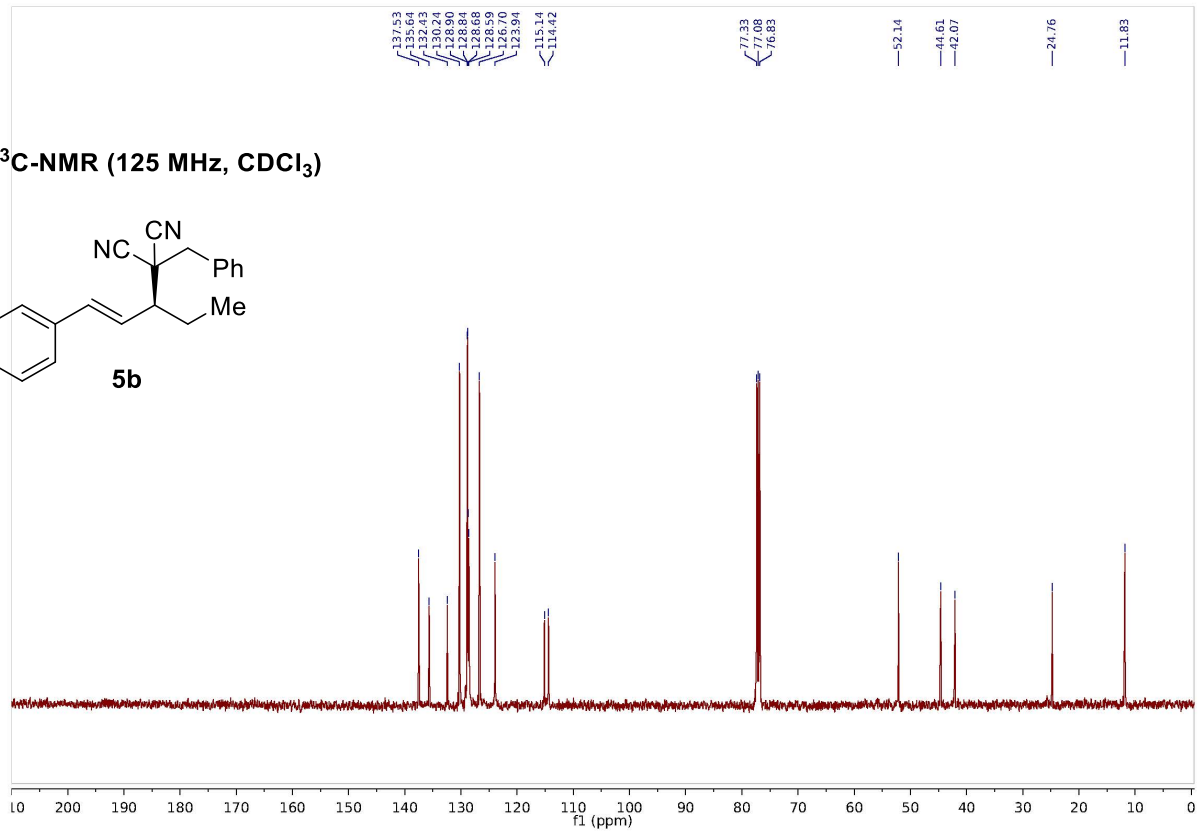

**<sup>1</sup>H-NMR (400 MHz, CDCl<sub>3</sub>)**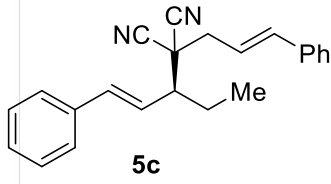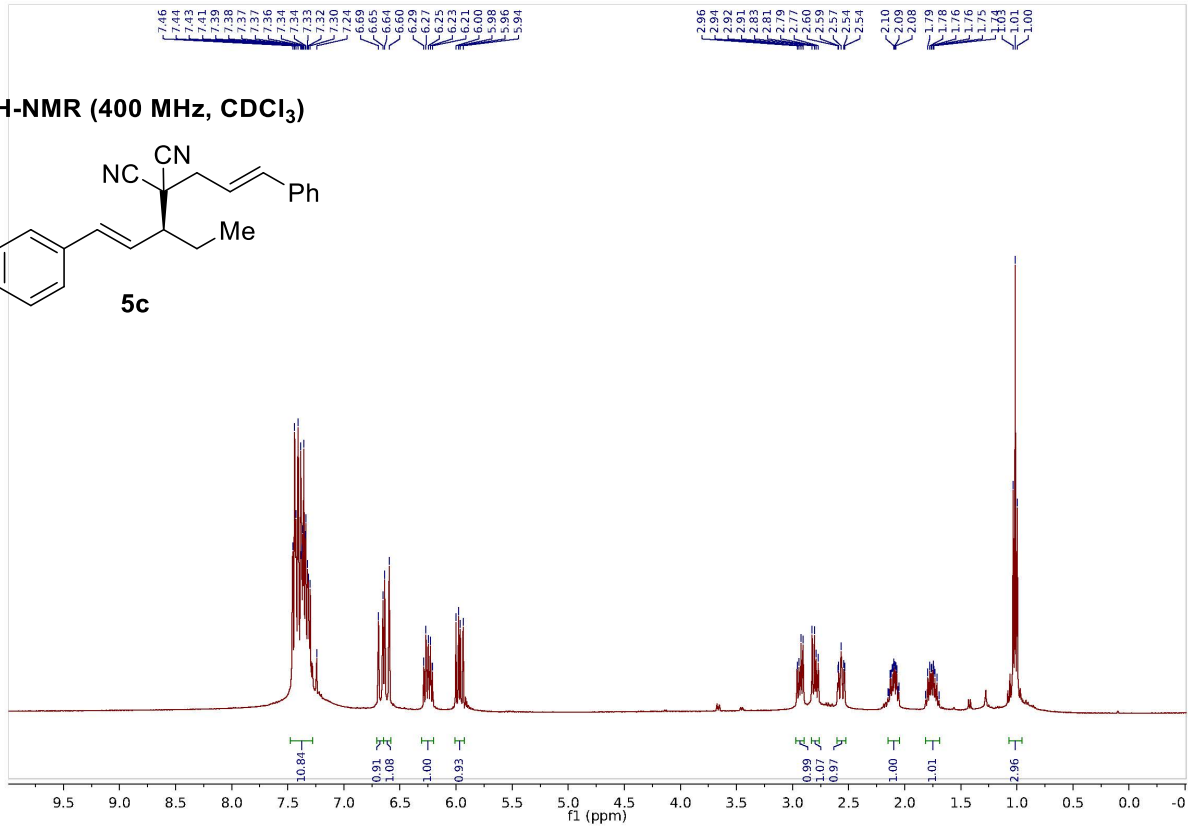**<sup>13</sup>C-NMR (125 MHz, CDCl<sub>3</sub>)**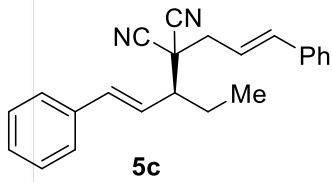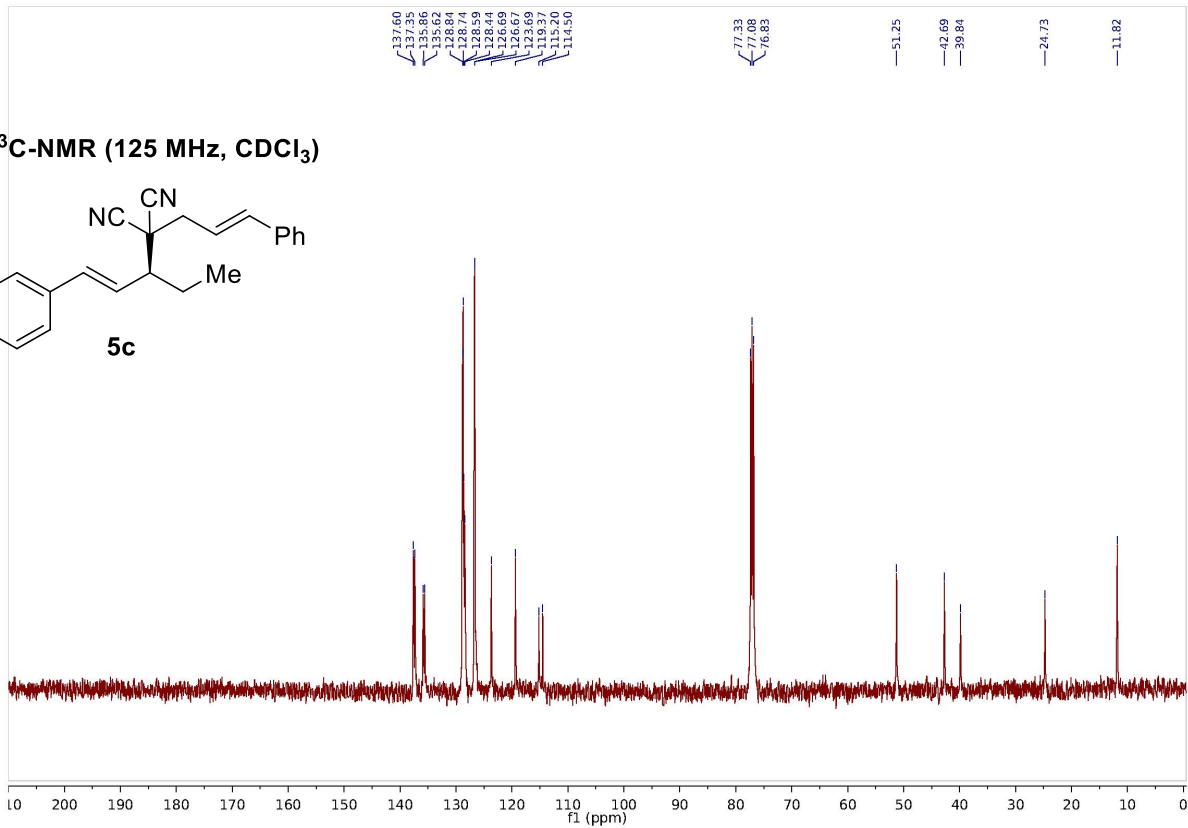



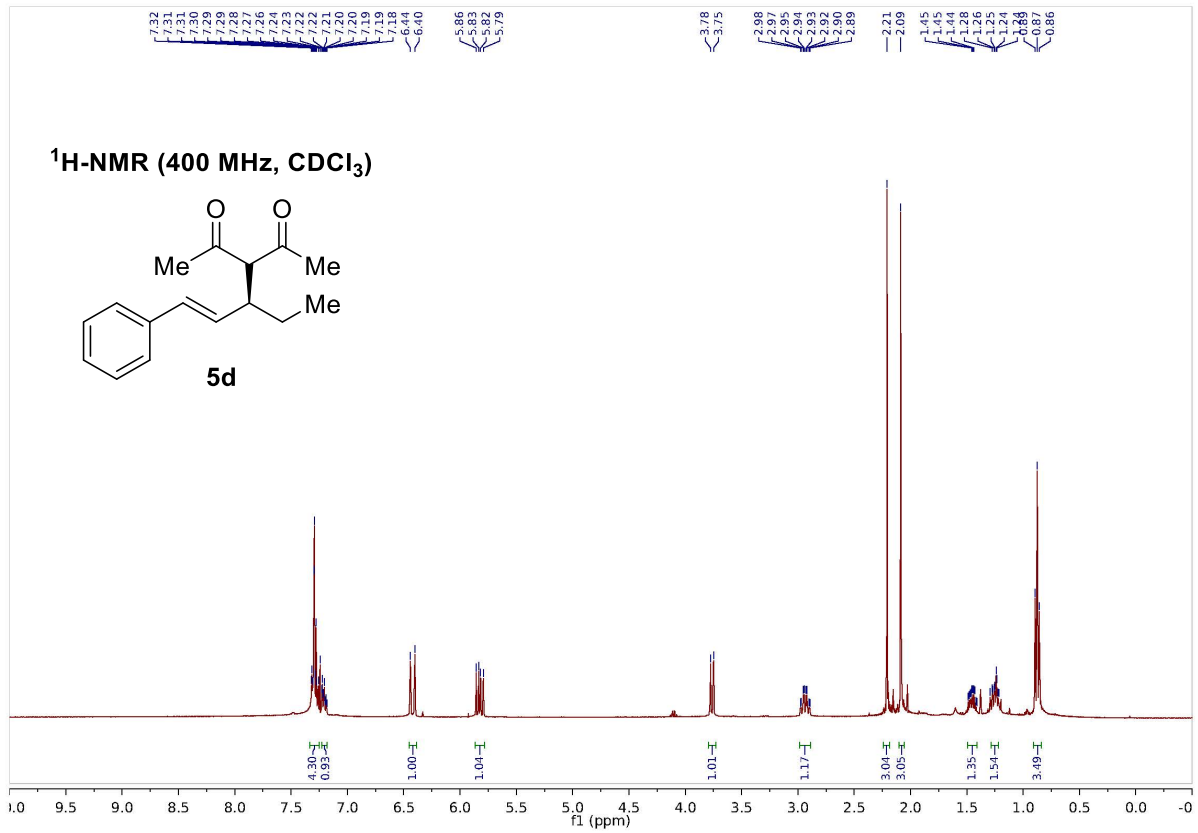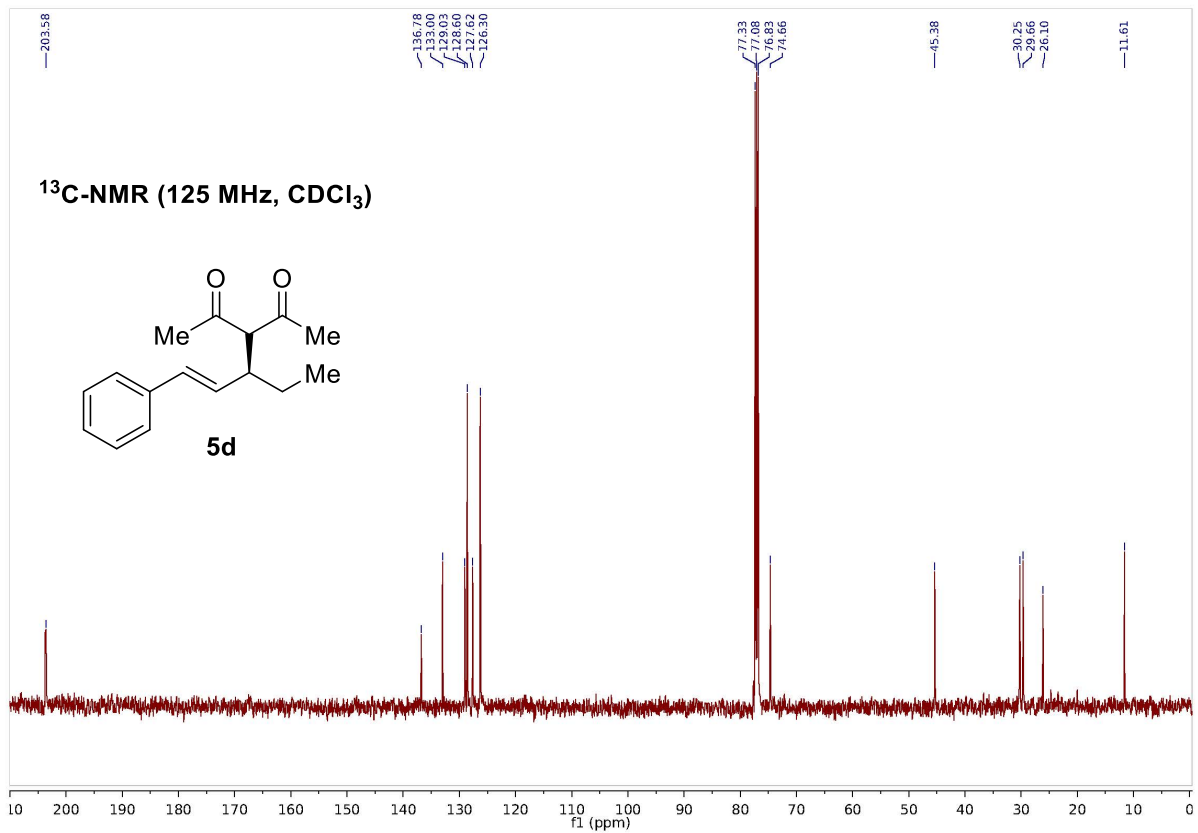

**<sup>1</sup>H-NMR (500 MHz, CDCl<sub>3</sub>)**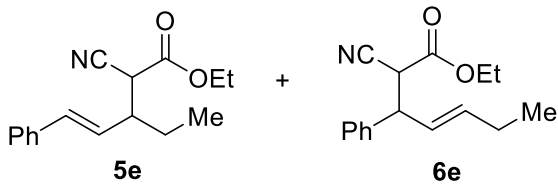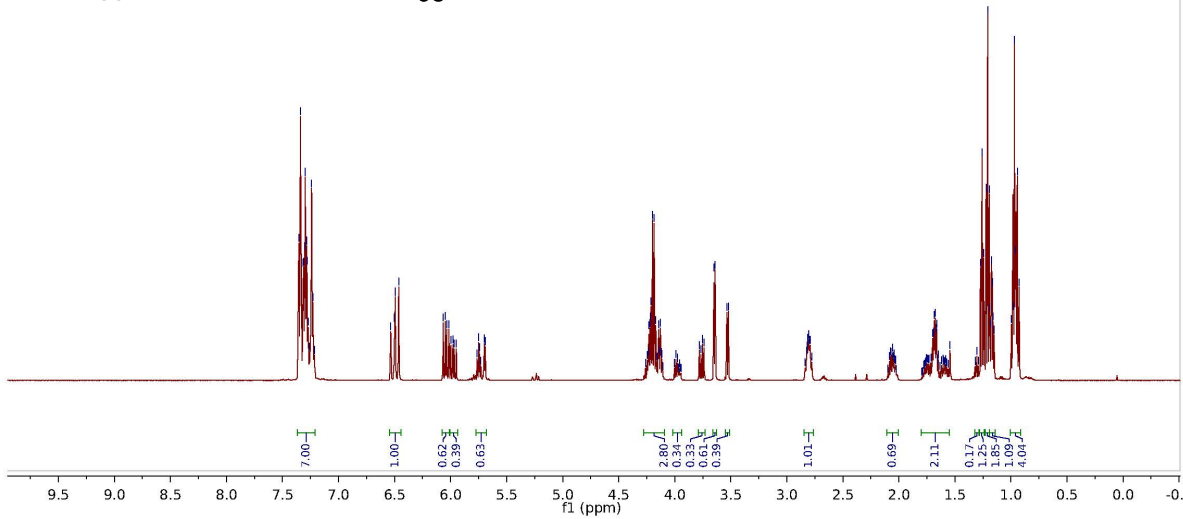**<sup>13</sup>C-NMR (125 MHz, CDCl<sub>3</sub>)**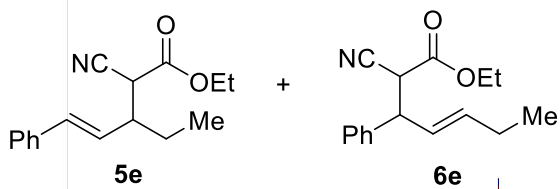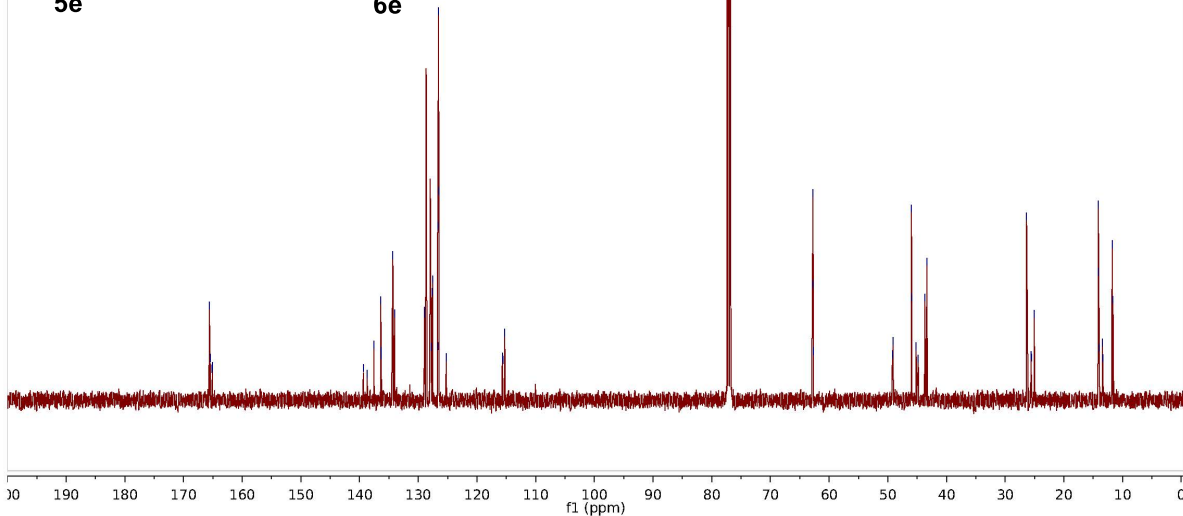

**<sup>1</sup>H-COSY-NMR (500 MHz, CDCl<sub>3</sub>)**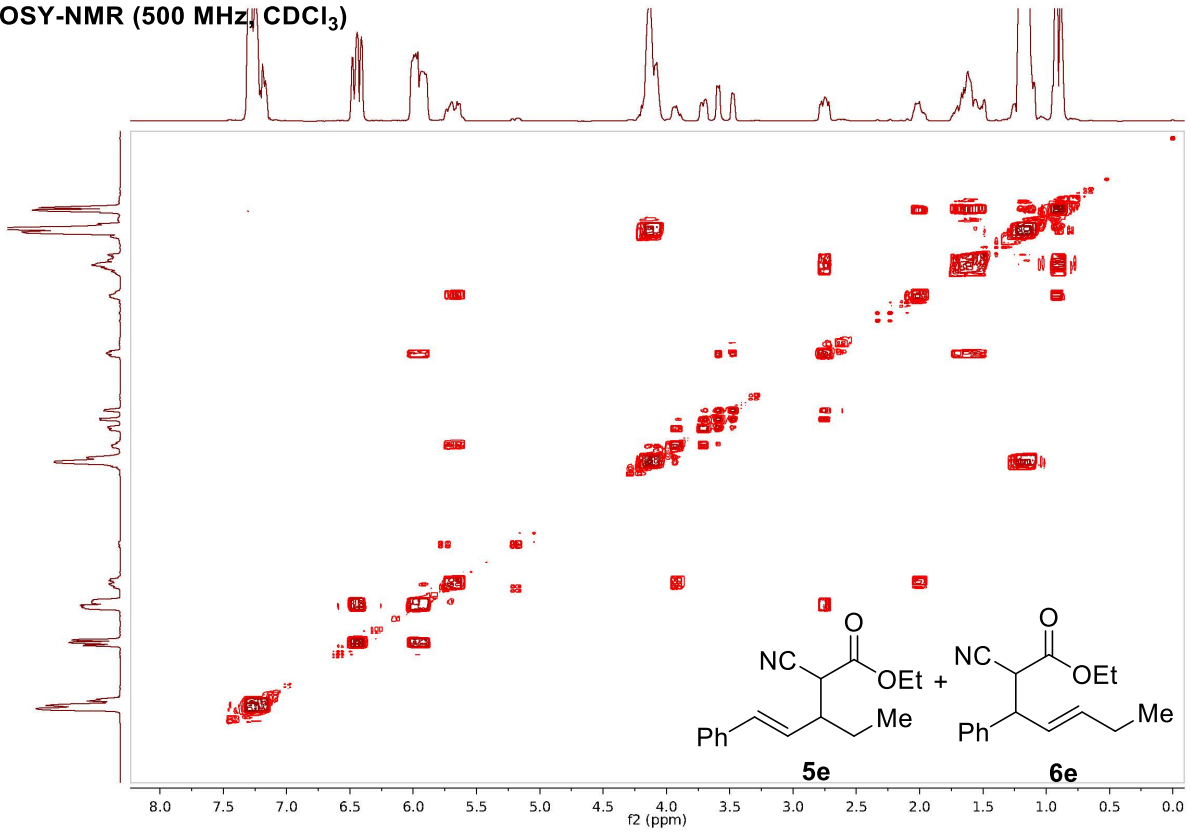**<sup>1</sup>H-NMR (500 MHz, CDCl<sub>3</sub>)**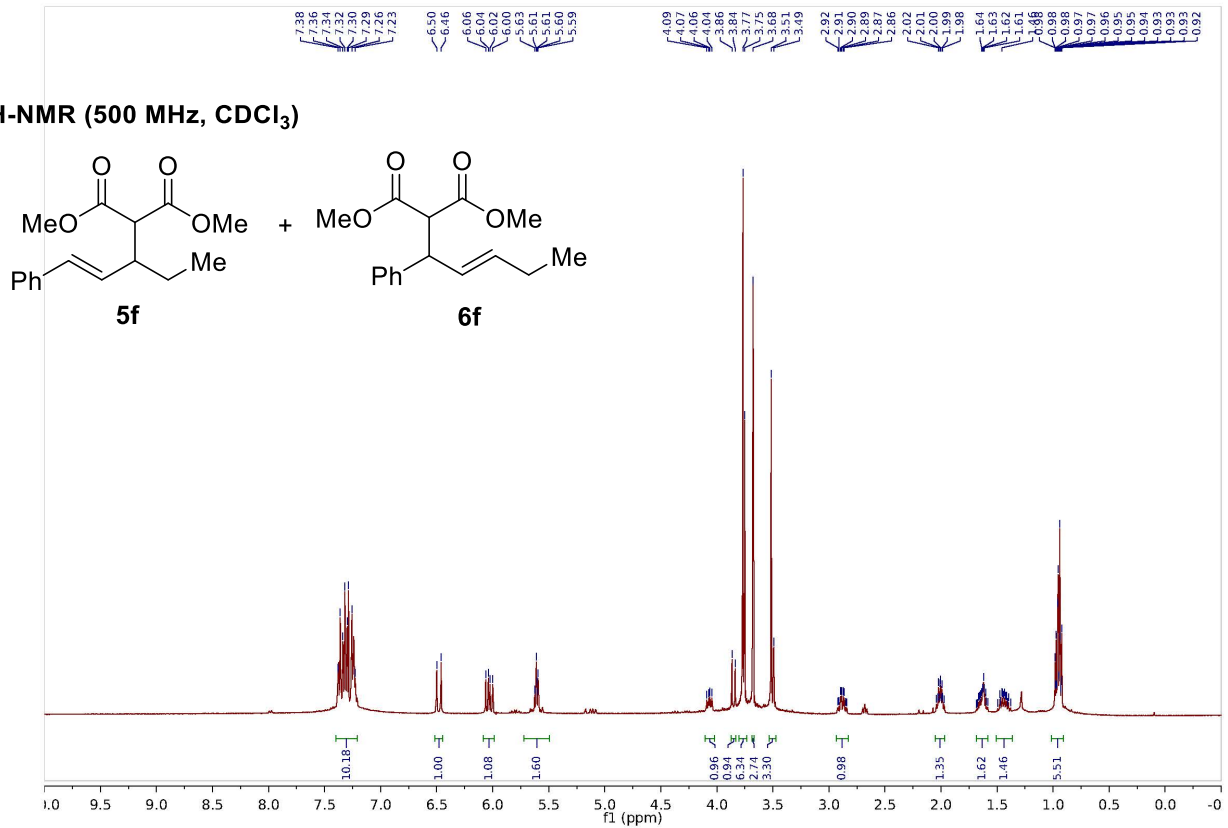

**<sup>1</sup>H-NMR (500 MHz, CDCl<sub>3</sub>)**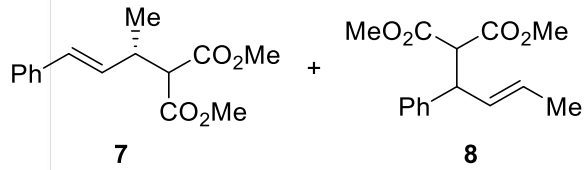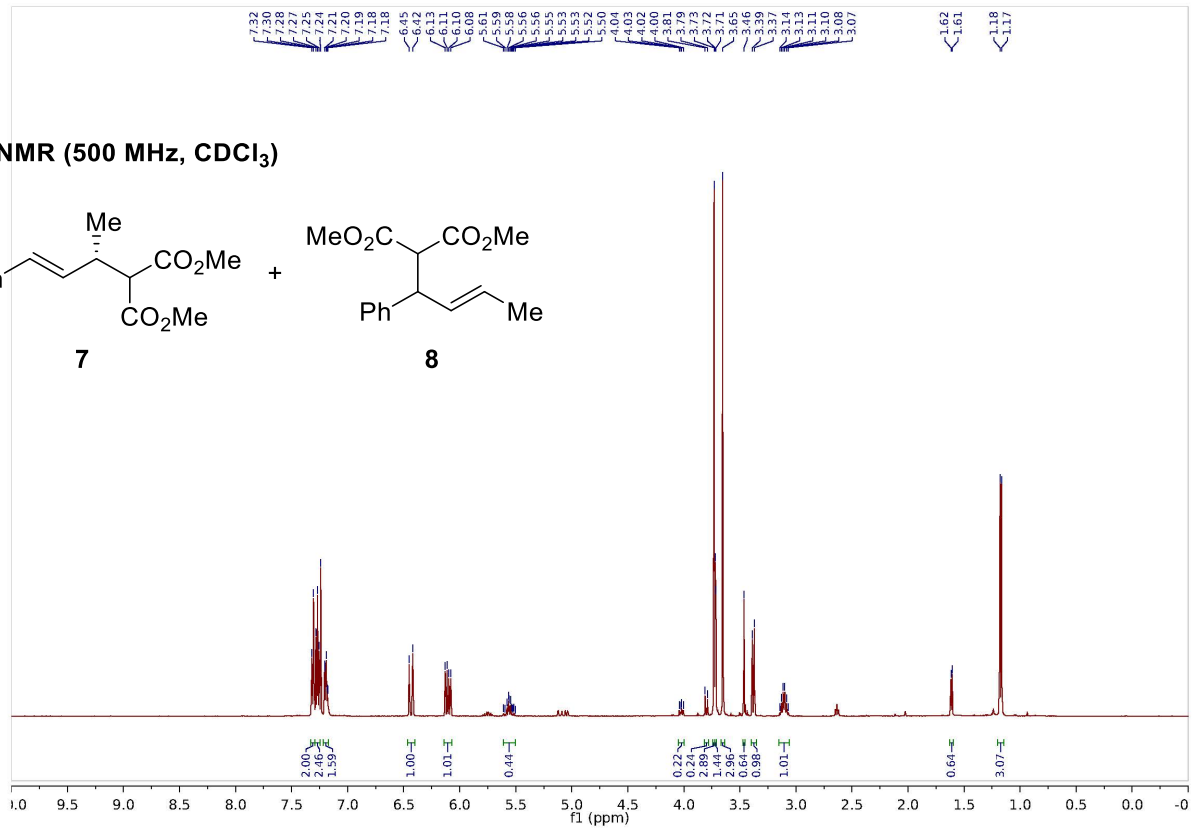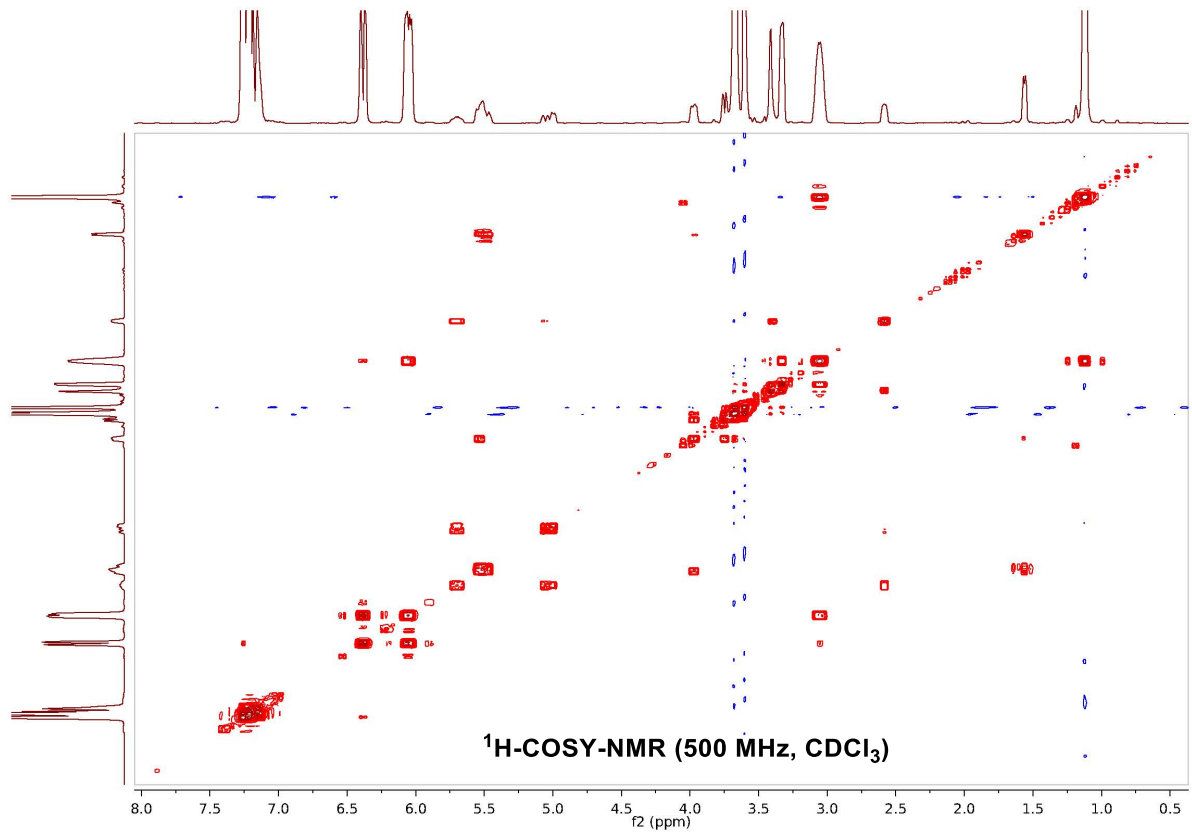

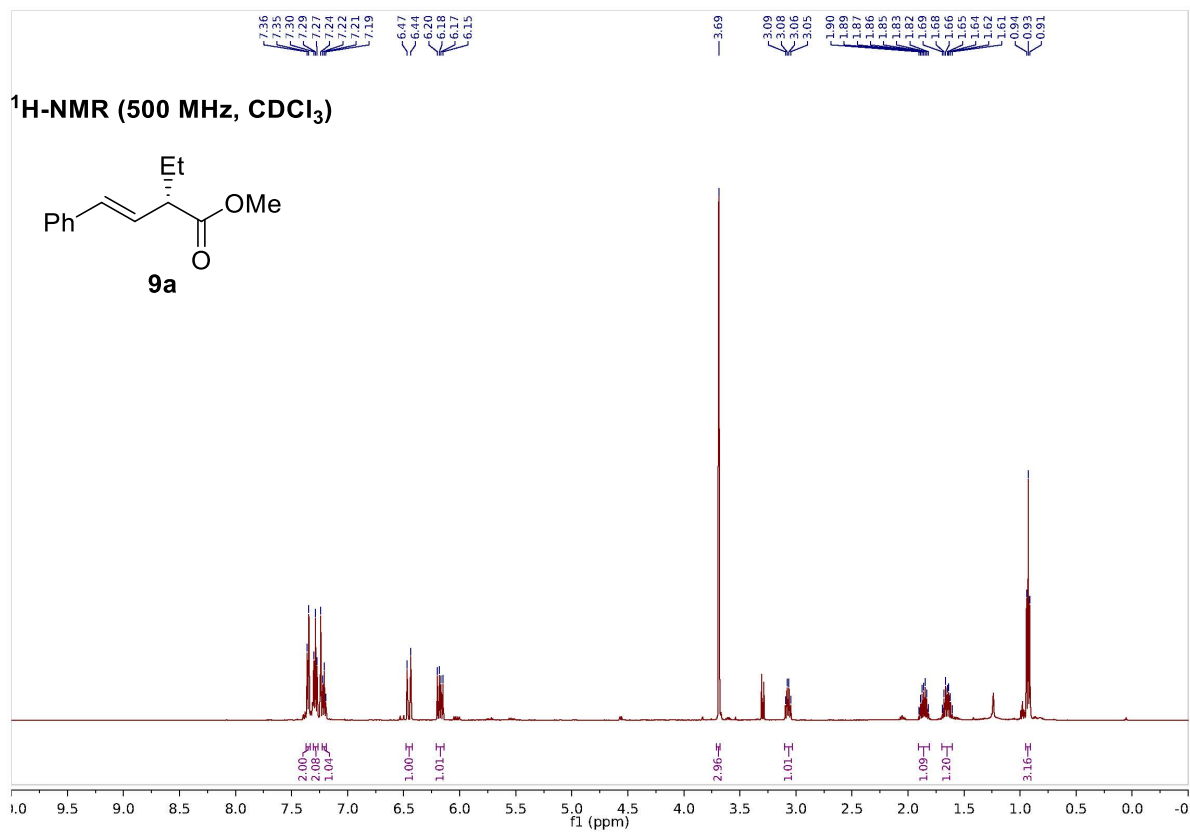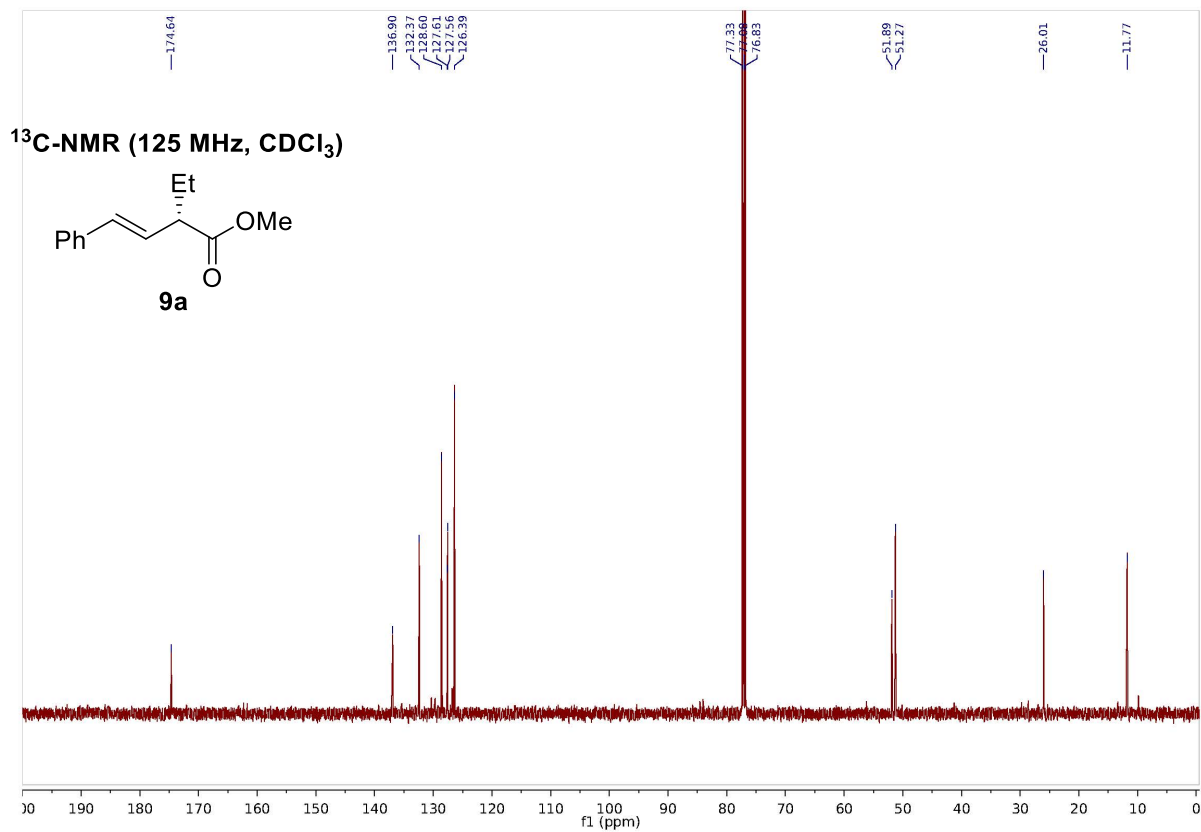

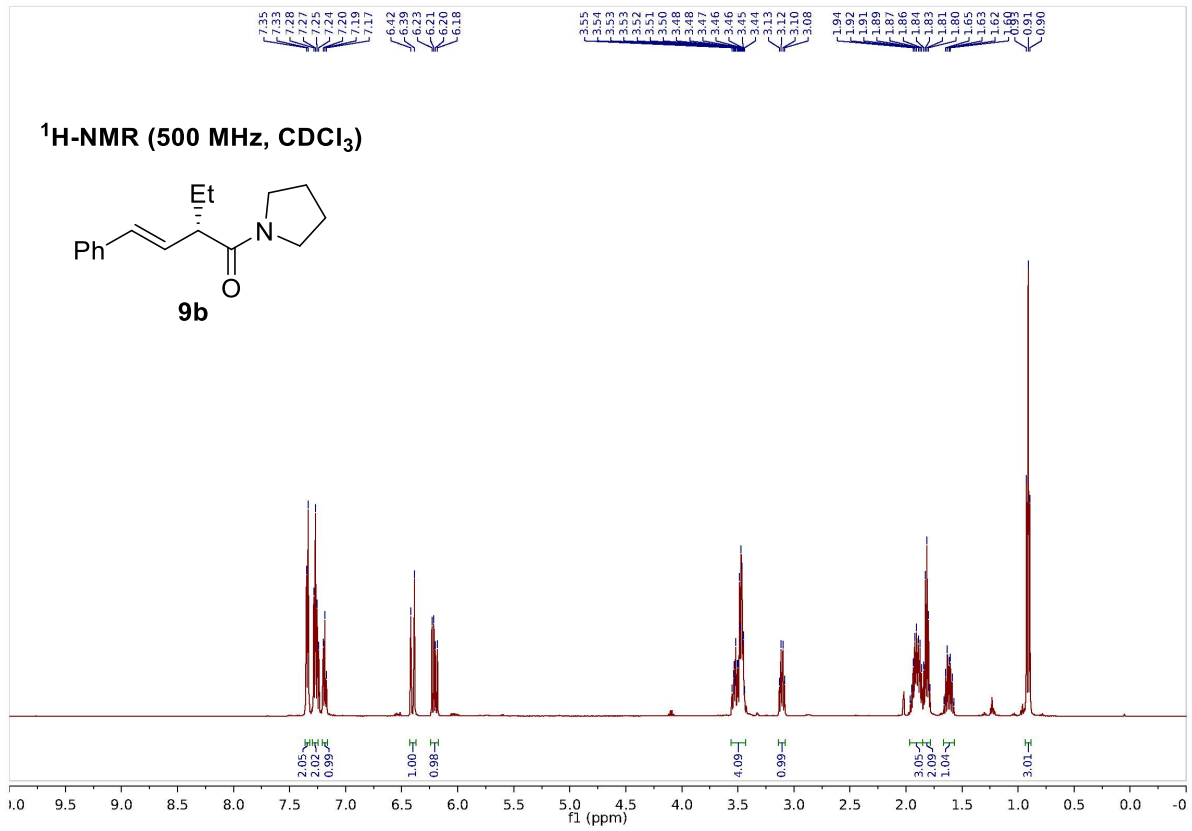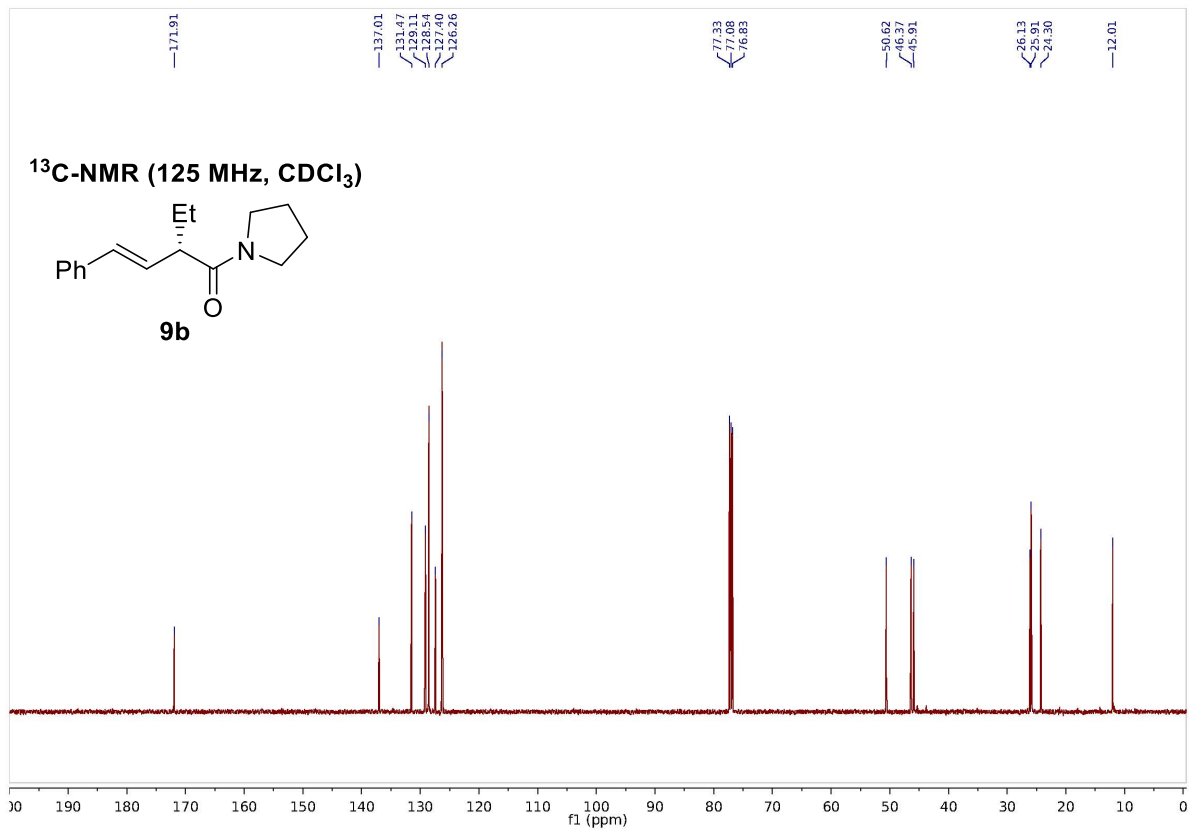

Supplement: SC-010-C9SC00633H-s001.pdf [file SC-010-C9SC00633H-s001.pdf]
